# Supplementary material for: Integration of the Connectivity Map and Pathway Analysis to Predict Plant Extract’s Medicinal Properties—The Study Case of Sarcopoterium spinosum L
Source: Plants (Basel). 2022 Aug 24;11(17):2195. doi: 10.3390/plants11172195 (PMC9460920; doi:10.3390/plants11172195)
Supplement: Supplementary file 1 [file plants-11-02195-s001.zip]

Archive with 6 entries (6 files):
- Original-blots.pdf
- Supplementary-Figures.pdf
- Supplementary-Table S1.xlsx
- Supplementary-Table S2.xlsx
- Supplementary-Table S3.xlsx
- Supplementary-Table S4.xlsx
