# Supplementary material for: Integration of the Connectivity Map and Pathway Analysis to Predict Plant Extract’s Medicinal Properties—The Study Case of Sarcopoterium spinosum L
Source: Plants (Basel). 2022 Aug 24;11(17):2195. doi: 10.3390/plants11172195 (PMC9460920; doi:10.3390/plants11172195)
Supplement: Supplementary file 1 [file plants-11-02195-s001.zip › Supplementary-Table S1.xlsx]

## Sheet: ssc2
	SYMBOLS	logFC	AveExpr	t	P.Value	adj.P.Val	B
ENSG00000186480	INSIG1	3.19885	6.05777	42.5382	1.05464e-31	1.44e-27	61.1138
ENSG00000167552	TUBA1A	1.93557	7.79365	37.1427	1.09432e-29	5.28802e-26	57.6493
ENSG00000161011	SQSTM1	1.55329	9.87989	36.8458	1.43898e-29	5.28802e-26	57.5373
ENSG00000167106	FAM102A	2.58763	6.7586	36.7662	1.54915e-29	5.28802e-26	57.0537
ENSG00000019186	CYP24A1	-1.92848	8.4974	-34.4538	1.41466e-28	3.86315e-25	55.0566
ENSG00000107984	DKK1	-1.75447	7.81897	-29.2693	3.51436e-26	7.99751e-23	49.6306
ENSG00000079459	FDFT1	1.72799	7.27353	28.8978	5.39928e-26	1.05317e-22	49.2776
ENSG00000087086	FTL	1.08286	12.6385	28.6964	6.8287e-26	1.16549e-22	48.8817
ENSG00000110092	CCND1	-1.96061	7.54395	-28.2547	1.14923e-25	1.74351e-22	48.409
ENSG00000168906	MAT2A	-1.40875	9.04258	-27.3951	3.23445e-25	4.41632e-22	47.5449
ENSG00000099194	SCD	1.05052	9.64254	27.1323	4.46476e-25	5.31665e-22	47.1966
ENSG00000189067	LITAF	1.28106	7.93424	27.0953	4.67261e-25	5.31665e-22	47.1757
ENSG00000140297	GCNT3	1.40381	7.90968	26.7879	6.84015e-25	7.18426e-22	46.7959
ENSG00000100201	DDX17	-1.63715	8.24012	-26.5049	9.7494e-25	9.50845e-22	46.422
ENSG00000137575	SDCBP	1.25481	8.56247	26.05	1.73589e-24	1.58012e-21	45.8661
ENSG00000171793	CTPS1	-1.7439	7.8831	-25.9284	2.02855e-24	1.73112e-21	45.6425
ENSG00000133030	MPRIP	-1.67178	8.39718	-25.7315	2.61397e-24	2.09948e-21	45.4501
ENSG00000147872	PLIN2	1.67836	6.17837	25.6801	2.79395e-24	2.11936e-21	45.2583
ENSG00000106366	SERPINE1	-1.29599	9.41928	-25.5113	3.47864e-24	2.49986e-21	45.1688
ENSG00000163435	ELF3	1.39585	7.2971	25.0318	6.53026e-24	4.45821e-21	44.5471
ENSG00000112096	SOD2	1.75027	6.07771	24.2374	1.89975e-23	1.2352e-20	43.3761
ENSG00000166197	RPLP0	0.91205	10.5671	23.96	2.77861e-23	1.72451e-20	42.9655
ENSG00000119707	NOLC1	-1.24515	8.51485	-23.6526	4.25401e-23	2.42252e-20	42.6797
ENSG00000171345	RBM25	-1.60267	7.57604	-23.6519	4.25813e-23	2.42252e-20	42.6251
ENSG00000118785	KRT19	1.31428	7.45334	23.4598	5.57081e-23	2.74084e-20	42.4114
ENSG00000130522	SPP1	1.30326	7.88338	23.4285	5.82132e-23	2.74084e-20	42.3614
ENSG00000104549	JUND	1.90366	5.84867	23.453	5.6243e-23	2.74084e-20	42.2961
ENSG00000124225	AKR1C3	1.03823	10.7859	23.4426	5.70714e-23	2.74084e-20	42.1956
ENSG00000133639	ANXA2	0.743574	12.312	23.4419	5.71291e-23	2.74084e-20	42.0657
ENSG00000196139	SQLE	1.25054	7.18226	23.33	6.68737e-23	3.04364e-20	42.2292
ENSG00000113645	PMEPA1	-1.2824	8.71319	-23.1745	8.33221e-23	3.66994e-20	42.0029
ENSG00000102804	BTG1	1.39058	6.84273	22.8159	1.39085e-22	5.64138e-20	41.4941
ENSG00000148773	WWC1	-2.18153	6.66211	-22.8354	1.35249e-22	5.64138e-20	41.2879
ENSG00000268621	THBS1	-2.39304	6.0941	-22.809	1.40477e-22	5.64138e-20	40.9011
ENSG00000108176	S100A6	0.939837	11.1385	22.6329	1.81133e-22	7.06624e-20	41.0048
ENSG00000137801	TSC22D1	1.27232	7.22913	22.5266	2.11373e-22	8.0169e-20	41.0836
ENSG00000101255	MKI67	-1.43336	8.92471	-22.4874	2.23794e-22	8.04355e-20	41.004
ENSG00000113552	DNAJC12	2.28168	4.83591	22.4872	2.23858e-22	8.04355e-20	40.6748
ENSG00000112972	AKR1C2	0.886944	10.7777	22.3201	2.85764e-22	1.00047e-19	40.5722
ENSG00000067064	TRIB3	2.00353	6.7196	22.2165	3.32771e-22	1.13591e-19	40.6018
ENSG00000112378	NA	1.86327	6.24619	22.1404	3.72291e-22	1.23982e-19	40.4957
ENSG00000167767	GNPDA1	1.4943	6.65343	22.1118	3.88354e-22	1.25105e-19	40.4723
ENSG00000142627	IDI1	1.50794	6.56565	22.1021	3.93988e-22	1.25105e-19	40.4521
ENSG00000221978	GAPDH	0.733436	11.745	22.0613	4.18505e-22	1.2987e-19	40.0976
ENSG00000052802	HMGCS1	1.27252	7.49476	22.0088	4.52368e-22	1.37258e-19	40.3203
ENSG00000165732	EEF1A1	0.875986	10.4829	21.8528	5.7066e-22	1.69387e-19	39.9078
ENSG00000142227	PERP	1.13434	8.53296	21.7007	7.16748e-22	2.08223e-19	39.8111
ENSG00000129474	KRT80	-1.31145	7.60675	-21.5563	8.90957e-22	2.48268e-19	39.6498
ENSG00000136068	CA12	0.926069	9.45516	21.5644	8.80238e-22	2.48268e-19	39.5464
ENSG00000166592	EPHA2	-1.67417	7.49754	-21.5418	9.1082e-22	2.48727e-19	39.6136
ENSG00000121039	MSMO1	1.97474	5.72061	21.2256	1.47365e-21	3.94532e-19	39.0791
ENSG00000102287	CCNL2	-1.98374	6.43612	-21.1192	1.73519e-21	4.5562e-19	38.7697
ENSG00000255717	DDX21	-1.07564	8.82487	-21.002	2.07885e-21	5.3556e-19	38.7695
ENSG00000167978	CD63	0.976148	9.14123	20.9075	2.40653e-21	6.08496e-19	38.5508
ENSG00000131981	RRAD	2.4588	4.73229	20.8442	2.65522e-21	6.5917e-19	38.1529
ENSG00000147459	EMP3	1.08909	8.21553	20.7601	3.02724e-21	7.38106e-19	38.3757
ENSG00000108312	TPM1	-0.887301	9.48792	-20.688	3.38841e-21	8.11674e-19	38.2148
ENSG00000163683	AJUBA	-1.72451	6.82876	-20.6214	3.76155e-21	8.8552e-19	38.1655
ENSG00000100906	FLNB	-1.30762	9.68682	-20.5754	4.04331e-21	9.20123e-19	38.0492
ENSG00000100941	GABRE	-2.4917	6.55599	-20.5835	3.99243e-21	9.20123e-19	37.8172
ENSG00000104419	RDH10	2.22713	5.07866	20.5503	4.20618e-21	9.41494e-19	37.9564
ENSG00000261786	SNHG1	-1.28203	7.74341	-20.2372	6.90936e-21	1.52162e-18	37.6115
ENSG00000131746	NOP56	-0.96245	8.85122	-20.0663	9.0842e-21	1.96882e-18	37.2738
ENSG00000160213	SRRM2	-1.34167	8.57419	-20.0489	9.34255e-21	1.99317e-18	37.2759
ENSG00000108828	UBC	0.792427	10.6838	19.8162	1.36073e-20	2.85838e-18	36.7152
ENSG00000122861	DOCK5	-1.6281	7.05228	-19.6631	1.74611e-20	3.61232e-18	36.6667
ENSG00000067082	UBTF	-1.28354	7.07486	-19.645	1.79867e-20	3.66554e-18	36.6594
ENSG00000029993	RPL10	0.775457	9.65258	19.6336	1.83252e-20	3.6796e-18	36.4615
ENSG00000109099	SMIM14	1.50062	5.57857	19.5658	2.04802e-20	4.05271e-18	36.4918
ENSG00000073008	LGALS3	1.05062	7.22097	19.4775	2.36802e-20	4.61898e-18	36.3685
ENSG00000114019	NFKBIA	1.2371	6.68737	19.4639	2.42167e-20	4.6571e-18	36.3623
ENSG00000100813	NDRG1	1.66186	5.72346	19.4218	2.59589e-20	4.92283e-18	36.2215
ENSG00000198796	RPS19	0.727205	11.1709	19.3481	2.93257e-20	5.48512e-18	35.8346
ENSG00000168398	NA	-2.30952	6.05824	-19.2965	3.19454e-20	5.89436e-18	35.7275
ENSG00000105856	PGD	0.727752	10.271	19.2577	3.40703e-20	6.20261e-18	35.7615
ENSG00000023445	PNN	-1.32448	7.85685	-19.145	4.11178e-20	7.38714e-18	35.8263
ENSG00000101384	TAGLN2	0.739785	9.88998	19.049	4.82889e-20	8.56282e-18	35.442
ENSG00000113161	KYNU	0.94497	8.64086	19.0174	5.09191e-20	8.91346e-18	35.5029
ENSG00000040275	CSTB	1.04943	7.61246	19.0037	5.21092e-20	9.00632e-18	35.5484
ENSG00000070814	TNS4	-2.04354	6.21013	-18.9801	5.42194e-20	9.25389e-18	35.443
ENSG00000173209	NQO1	0.652005	11.0224	18.9654	5.5578e-20	9.36867e-18	35.1946
ENSG00000168502	TPT1	0.887042	10.2086	18.9232	5.96766e-20	9.93688e-18	35.2172
ENSG00000108848	VAT1	1.08435	7.81884	18.8691	6.53854e-20	1.07563e-17	35.3028
ENSG00000090013	PLAU	1.01584	7.26656	18.7988	7.36615e-20	1.19735e-17	35.2135
ENSG00000122870	KLF6	1.16897	6.79229	18.7465	8.05014e-20	1.29314e-17	35.166
ENSG00000134318	TMBIM6	0.675608	10.2512	18.7226	8.38415e-20	1.33113e-17	34.8622
ENSG00000248527	ANXA1	0.765436	11.0223	18.7055	8.63226e-20	1.35477e-17	34.7555
ENSG00000142871	PMP22	1.31686	6.22825	18.638	9.68586e-20	1.48596e-17	34.9846
ENSG00000095752	HMGB3	1.02929	7.64325	18.6403	9.64853e-20	1.48596e-17	34.9154
ENSG00000064042	PVR	-1.28507	7.51205	-18.519	1.1876e-19	1.78192e-17	34.7767
ENSG00000143507	AMOTL2	-2.00198	6.27179	-18.5226	1.18037e-19	1.78192e-17	34.6497
ENSG00000159713	ALPK2	-1.8611	6.10155	-18.4574	1.32055e-19	1.95987e-17	34.4901
ENSG00000169991	ACIN1	-1.16871	7.6222	-18.4244	1.39786e-19	2.03047e-17	34.6079
ENSG00000147123	ENO1	0.643603	11.7615	18.4292	1.38634e-19	2.03047e-17	34.1795
ENSG00000138764	BDKRB2	2.07593	4.27434	18.3731	1.52715e-19	2.19491e-17	34.3169
ENSG00000197969	HBP1	1.78343	5.04443	18.3254	1.65861e-19	2.35902e-17	34.3532
ENSG00000130635	BIRC3	1.41664	6.99326	18.3135	1.69329e-19	2.38352e-17	34.41
ENSG00000187079	LDHA	0.636406	11.2731	18.2957	1.74653e-19	2.43337e-17	33.994
ENSG00000146278	SPDL1	-1.10896	7.71249	-18.2598	1.85874e-19	2.56356e-17	34.3156
ENSG00000137834	HMGCR	1.1359	6.69787	18.1921	2.09134e-19	2.85552e-17	34.2083
ENSG00000276550	RPLP1	0.884949	10.6987	18.1208	2.36825e-19	3.20159e-17	33.7542
ENSG00000073756	RPL27A	0.788089	9.64122	18.0819	2.53512e-19	3.39358e-17	33.796
ENSG00000139645	TCOF1	-1.36639	7.20007	-18.0536	2.6643e-19	3.53187e-17	33.9785
ENSG00000148843	JAG1	-1.4218	6.63961	-17.9781	3.04215e-19	3.95595e-17	33.8353
ENSG00000114270	LUC7L3	-1.30232	7.95357	-17.9827	3.01756e-19	3.95595e-17	33.821
ENSG00000226608	DAZAP2	0.829193	8.36853	17.9475	3.21075e-19	4.13582e-17	33.6596
ENSG00000153317	EIF3K	0.844506	8.87345	17.9415	3.24453e-19	4.14027e-17	33.6119
ENSG00000165105	CCN1	-2.98596	6.0298	-17.9293	3.31547e-19	4.19161e-17	33.1521
ENSG00000134324	CCNG2	3.38547	2.84931	17.9059	3.4548e-19	4.32769e-17	32.0668
ENSG00000064607	AHSA2P	-2.02573	6.14224	-17.8904	3.55116e-19	4.40796e-17	33.4965
ENSG00000128567	BLVRB	1.03264	7.83236	17.8295	3.95477e-19	4.86473e-17	33.5026
ENSG00000168209	MTCL1	-1.61545	6.90772	-17.794	4.21175e-19	5.08913e-17	33.5216
ENSG00000196950	RPL13A	0.695216	10.9918	17.7957	4.19942e-19	5.08913e-17	33.1457
ENSG00000163083	DUSP10	2.55024	3.41393	17.7305	4.71552e-19	5.64787e-17	32.5525
ENSG00000103978	IL11	-2.80417	5.58686	-17.7213	4.7932e-19	5.69099e-17	32.7355
ENSG00000123066	CRIM1	-0.965414	8.12506	-17.6951	5.02242e-19	5.91173e-17	33.2789
ENSG00000176153	RPS12	0.853009	9.59941	17.6813	5.14727e-19	6.00691e-17	33.0834
ENSG00000132669	BICC1	-1.15384	7.22478	-17.6624	5.32374e-19	6.1602e-17	33.2792
ENSG00000171552	RPS3	0.810803	10.2978	17.5687	6.29537e-19	7.22328e-17	32.8036
ENSG00000182253	S100A4	0.838088	10.1202	17.5518	6.48924e-19	7.38367e-17	32.7764
ENSG00000158417	NA	1.10859	10.0833	17.4456	7.85477e-19	8.86355e-17	32.5903
ENSG00000160818	HNRNPH1	-0.729598	9.71541	-17.4322	8.048e-19	9.00717e-17	32.6612
ENSG00000168461	ROCK2	-1.26715	7.16496	-17.3301	9.67864e-19	1.07441e-16	32.6932
ENSG00000118960	IFFO2	-1.85916	5.87255	-17.3234	9.79747e-19	1.07883e-16	32.5459
ENSG00000164949	LIMCH1	-1.25958	7.12383	-17.3156	9.93663e-19	1.0803e-16	32.6693
ENSG00000108021	RPS5	0.835829	9.97845	17.3138	9.96908e-19	1.0803e-16	32.3653
ENSG00000130816	TPPP3	1.94018	4.2576	17.2685	1.08253e-18	1.16385e-16	32.4432
ENSG00000006062	GALNT10	-0.853433	8.23807	-17.2368	1.14675e-18	1.22326e-16	32.4331
ENSG00000119655	RPS14	0.837565	9.71616	17.214	1.19544e-18	1.26532e-16	32.2089
ENSG00000005100	COL5A1	-1.49006	6.82362	-17.1688	1.29803e-18	1.36333e-16	32.4051
ENSG00000225630	VPS13A	-1.72066	6.69695	-17.1202	1.4187e-18	1.47869e-16	32.2989
ENSG00000145685	ATP6V0E1	0.966189	7.99204	17.1094	1.44715e-18	1.49693e-16	32.1773
ENSG00000150593	PLK2	-0.963752	8.2487	-17.0454	1.62741e-18	1.67073e-16	32.0844
ENSG00000172893	NRG1	-0.892868	8.48216	-17.0386	1.64762e-18	1.67634e-16	32.0646
ENSG00000122257	PNRC1	2.28093	4.29754	17.0354	1.65743e-18	1.67634e-16	31.7742
ENSG00000132357	STMN1	0.777562	8.61627	17.0131	1.72676e-18	1.72097e-16	31.9309
ENSG00000112576	SLC25A5	0.703754	9.57957	17.0149	1.72112e-18	1.72097e-16	31.8498
ENSG00000144560	S100A11	0.873873	9.37071	16.9685	1.87463e-18	1.84145e-16	31.7848
ENSG00000177084	HERC2P2	-2.6252	5.30896	-16.9691	1.87243e-18	1.84145e-16	31.2092
ENSG00000134186	RPL13	0.706163	9.93993	16.8324	2.41131e-18	2.35171e-16	31.4733
ENSG00000139112	RPS4X	0.757787	10.6438	16.8135	2.49708e-18	2.4181e-16	31.3687
ENSG00000134884	SLC2A1	0.948251	7.83208	16.7927	2.59562e-18	2.49582e-16	31.5889
ENSG00000134070	SMAD6	-1.36356	6.56139	-16.7735	2.6899e-18	2.54986e-16	31.6786
ENSG00000078401	NDUFB11	1.0648	6.95919	16.7699	2.70785e-18	2.54986e-16	31.6258
ENSG00000172175	RPL15	0.718054	9.38733	16.772	2.69733e-18	2.54986e-16	31.4183
ENSG00000137504	TEAD1	-1.10818	7.84223	-16.7597	2.75979e-18	2.58097e-16	31.6043
ENSG00000130513	RPLP2	0.741471	9.32843	16.7505	2.80761e-18	2.60783e-16	31.3828
ENSG00000171617	ANKRD52	-1.05814	7.49239	-16.7456	2.83338e-18	2.61398e-16	31.5862
ENSG00000120800	COL7A1	-1.3935	8.05267	-16.7412	2.85665e-18	2.61776e-16	31.5496
ENSG00000003436	PDCD11	-1.32905	6.70611	-16.7165	2.99137e-18	2.71302e-16	31.5759
ENSG00000125844	CTSL	0.767091	8.8061	16.7149	3.00034e-18	2.71302e-16	31.3721
ENSG00000144366	NA	1.11267	8.94198	16.6339	3.49041e-18	3.1354e-16	31.1947
ENSG00000166750	RPS11	0.825046	10.4913	16.617	3.60253e-18	3.21496e-16	31.0061
ENSG00000185262	ATP5MC2	0.875576	8.12828	16.6073	3.66895e-18	3.25298e-16	31.216
ENSG00000132382	PTGS2	1.46859	5.73153	16.5683	3.94747e-18	3.47734e-16	31.2952
ENSG00000239306	RPSA	0.773499	8.72062	16.5452	4.12286e-18	3.60856e-16	31.0496
ENSG00000233913	DSTN	0.70986	10.1335	16.4634	4.80994e-18	4.18312e-16	30.7633
ENSG00000144354	EPS8	0.995232	6.78359	16.4277	5.14482e-18	4.44604e-16	30.994
ENSG00000125968	ASAP1	-1.2557	7.17067	-16.4191	5.229e-18	4.46229e-16	31.0131
ENSG00000075651	ANXA4	0.741526	8.91377	16.4196	5.22486e-18	4.46229e-16	30.7858
ENSG00000146066	DDIT4	1.70126	5.50467	16.4058	5.36231e-18	4.54764e-16	30.9837
ENSG00000106462	NA	0.836325	8.21032	16.3952	5.47184e-18	4.61188e-16	30.807
ENSG00000179409	RPL8	0.759683	10.7655	16.3302	6.18923e-18	5.18453e-16	30.4214
ENSG00000153914	PODXL	-1.22654	7.10711	-16.3017	6.53343e-18	5.43948e-16	30.7804
ENSG00000196498	IDH1	0.920237	7.59797	16.2765	6.85503e-18	5.67264e-16	30.6416
ENSG00000134215	SUGP2	-1.39762	6.47234	-16.2487	7.22819e-18	5.94541e-16	30.6988
ENSG00000156804	PRDX4	0.847492	7.73024	16.2384	7.37081e-18	5.99054e-16	30.5513
ENSG00000148840	RPL19	0.662527	10.7294	16.2393	7.35892e-18	5.99054e-16	30.2582
ENSG00000140859	PRRC2C	-0.941466	8.11515	-16.2174	7.67223e-18	6.19862e-16	30.5449
ENSG00000175455	AGR2	0.988301	8.90941	16.2105	7.77499e-18	6.24469e-16	30.37
ENSG00000123595	RIN2	1.19294	6.05	16.2048	7.85905e-18	6.27529e-16	30.6061
ENSG00000133935	PRDX1	0.739201	10.0492	16.157	8.6126e-18	6.837e-16	30.171
ENSG00000153885	MED13L	-1.22197	6.65347	-16.1536	8.66792e-18	6.84114e-16	30.5196
ENSG00000116711	RPL27	0.80865	9.65135	16.1394	8.90815e-18	6.99034e-16	30.1804
ENSG00000143222	RASEF	1.18338	5.99182	16.1361	8.96442e-18	6.99139e-16	30.4843
ENSG00000120437	RPL11	0.735069	9.46309	16.1333	9.0119e-18	6.99139e-16	30.1943
ENSG00000157193	RACK1	0.664043	10.5418	16.1047	9.52097e-18	7.34459e-16	30.0159
ENSG00000214548	LGALS1	0.802819	8.90078	16.099	9.62478e-18	7.38296e-16	30.1645
ENSG00000104765	TMEM106C	0.844314	7.80438	16.0928	9.74052e-18	7.43001e-16	30.2597
ENSG00000154127	CYB5B	0.798473	8.37968	16.085	9.88793e-18	7.50054e-16	30.1914
ENSG00000169047	GPX2	1.03064	8.94621	15.9362	1.31744e-17	9.93833e-16	29.8238
ENSG00000119801	NA	0.888606	7.42447	15.9222	1.35379e-17	1.01564e-15	29.9661
ENSG00000276043	MYL6	0.808032	9.82859	15.9147	1.37361e-17	1.02488e-15	29.7105
ENSG00000147383	SLC39A10	1.15555	6.20951	15.8673	1.50564e-17	1.11125e-15	29.9332
ENSG00000090905	VIM	0.613399	9.99462	15.8686	1.50203e-17	1.11125e-15	29.6107
ENSG00000118508	GEM	2.32295	3.58992	15.8209	1.64785e-17	1.20966e-15	29.2954
ENSG00000163545	RPS8	0.692822	9.46496	15.8112	1.67921e-17	1.22609e-15	29.5578
ENSG00000187134	PTGES	0.903092	7.42545	15.7686	1.82485e-17	1.32535e-15	29.649
ENSG00000138166	SMC1A	-0.788054	8.41589	-15.7102	2.04521e-17	1.47753e-15	29.5068
ENSG00000157399	BCL2L1	-1.04134	7.39015	-15.6871	2.14004e-17	1.5379e-15	29.5657
ENSG00000105576	SYNM	-1.30265	6.12982	-15.6493	2.30466e-17	1.64753e-15	29.5425
ENSG00000153815	TMEM87A	1.30993	5.95211	15.6345	2.37247e-17	1.68718e-15	29.5145
ENSG00000198918	RAB31	1.21691	6.17387	15.557	2.76352e-17	1.95508e-15	29.3484
ENSG00000105810	NA	0.779255	8.69181	15.5422	2.84535e-17	2.0026e-15	29.0976
ENSG00000130164	EIF3A	-0.791716	8.93307	-15.5183	2.98275e-17	2.08853e-15	29.0796
ENSG00000138398	FKBP4	-0.845871	8.16364	-15.5127	3.01583e-17	2.10093e-15	29.1651
ENSG00000065328	BRK1	0.853883	7.81876	15.508	3.04425e-17	2.10996e-15	29.1076
ENSG00000198053	GPATCH4	-1.4008	6.62096	-15.4692	3.28654e-17	2.26639e-15	29.1965
ENSG00000176697	DDX5	-0.706516	10.2531	-15.4343	3.52224e-17	2.41671e-15	28.7656
ENSG00000164713	EIF5B	-1.2985	7.76286	-15.4088	3.70518e-17	2.52953e-15	29.0025
ENSG00000100577	HINT1	0.771667	8.92533	15.4056	3.72818e-17	2.53257e-15	28.8071
ENSG00000114796	FAU	0.91453	7.91133	15.3858	3.87829e-17	2.62149e-15	28.8507
ENSG00000183018	INHBB	-1.37805	5.86516	-15.3653	4.03929e-17	2.71687e-15	28.99
ENSG00000185963	RPL37A	0.803169	9.70505	15.3621	4.0654e-17	2.72103e-15	28.6327
ENSG00000115738	DNMT1	-1.14244	7.24043	-15.342	4.2311e-17	2.81203e-15	28.9008
ENSG00000103044	NA	1.04641	8.69367	15.3407	4.24256e-17	2.81203e-15	28.684
ENSG00000074047	HS1BP3	1.4494	5.04554	15.3285	4.34703e-17	2.86736e-15	28.912
ENSG00000110921	MAP3K14	-1.65725	6.10766	-15.2915	4.67969e-17	3.07195e-15	28.8345
ENSG00000163131	TASOR2	-1.17864	7.43744	-15.2689	4.89567e-17	3.19835e-15	28.754
ENSG00000064666	NA	0.74879	8.75085	15.2607	4.97671e-17	3.23581e-15	28.5229
ENSG00000103089	DHX33	-1.2216	6.43834	-15.2534	5.05e-17	3.25738e-15	28.7697
ENSG00000211448	EEF1B2	0.735259	8.72777	15.2527	5.0576e-17	3.25738e-15	28.5141
ENSG00000168264	PGK1	0.599295	10.0643	15.2468	5.11712e-17	3.28024e-15	28.3677
ENSG00000160712	NPC2	1.0769	6.78716	15.2413	5.17342e-17	3.30083e-15	28.6712
ENSG00000024862	TALDO1	0.703149	9.00075	15.2389	5.19894e-17	3.30169e-15	28.4566
ENSG00000186185	LHFPL2	1.00241	6.65685	15.2122	5.48392e-17	3.46655e-15	28.6304
ENSG00000110888	RPS21	0.863119	8.88675	15.2051	5.56279e-17	3.5002e-15	28.399
ENSG00000111266	DBI	0.986288	7.74817	15.1966	5.65891e-17	3.54435e-15	28.4869
ENSG00000077044	RPL18	0.732725	9.92218	15.1843	5.80061e-17	3.61651e-15	28.2421
ENSG00000125772	MDH1	0.810842	8.33977	15.1675	5.99921e-17	3.72333e-15	28.3746
ENSG00000112159	COX8A	0.870713	7.59711	15.1607	6.08119e-17	3.74286e-15	28.4235
ENSG00000153207	PRDX5	0.956494	8.04396	15.1604	6.0855e-17	3.74286e-15	28.3809
ENSG00000165271	ANXA5	0.669358	9.13614	15.1171	6.63932e-17	4.06517e-15	28.1918
ENSG00000137817	CARD6	1.71774	4.28412	15.0756	7.21814e-17	4.39984e-15	28.2667
ENSG00000175592	RPS16	0.830724	10.8359	15.0729	7.2589e-17	4.40502e-15	27.9029
ENSG00000189143	DHCR7	1.06349	6.57261	15.0382	7.78492e-17	4.70333e-15	28.2731
ENSG00000166710	PDCD4	1.41586	5.14527	15.034	7.85121e-17	4.71689e-15	28.3212
ENSG00000160949	TNS3	-0.836944	8.31362	-15.0324	7.87645e-17	4.71689e-15	28.1226
ENSG00000172602	LPIN1	1.34263	5.57231	15.0147	8.16379e-17	4.86762e-15	28.2931
ENSG00000197989	CCND3	-1.3358	6.65685	-14.9811	8.73933e-17	5.18812e-15	28.2123
ENSG00000179456	TSPAN14	-0.883142	7.65294	-14.964	9.04876e-17	5.34856e-15	28.0772
ENSG00000153714	CHCHD2	0.789541	8.70288	14.9313	9.66996e-17	5.6911e-15	27.8535
ENSG00000170412	NA	0.810625	7.44464	14.9263	9.76747e-17	5.72382e-15	27.9603
ENSG00000205155	CFL1	0.677395	10.475	14.8355	1.17539e-16	6.85843e-15	27.4579
ENSG00000196547	NA	0.830908	7.49289	14.8219	1.20853e-16	7.02182e-15	27.7505
ENSG00000172216	SLC7A5	-0.889658	10.2518	-14.8119	1.23342e-16	7.13608e-15	27.5102
ENSG00000107201	VGLL4	1.56987	4.62332	14.7967	1.27237e-16	7.33034e-15	27.8164
ENSG00000148346	CST3	0.797049	7.85689	14.7919	1.28498e-16	7.37189e-15	27.6434
ENSG00000178726	RBBP6	-1.12254	6.80773	-14.7597	1.37256e-16	7.83975e-15	27.7611
ENSG00000133466	TMEM147	0.854991	7.8418	14.7557	1.38376e-16	7.83975e-15	27.5649
ENSG00000126001	ATP5F1B	0.561856	10.2574	14.7566	1.3812e-16	7.83975e-15	27.3223
ENSG00000135821	IRAK2	1.39559	5.54486	14.7442	1.41678e-16	7.99369e-15	27.7472
ENSG00000227051	EDN1	-1.17258	6.59051	-14.7253	1.47305e-16	8.2444e-15	27.7012
ENSG00000130558	RPS4Y1	0.815601	7.67465	14.7252	1.47329e-16	8.2444e-15	27.5335
ENSG00000165757	COX5B	0.952662	6.82215	14.6706	1.64831e-16	9.18614e-15	27.5089
ENSG00000146678	RPL35	0.70592	8.95019	14.6532	1.70852e-16	9.483e-15	27.2518
ENSG00000080345	UBA52	0.774291	8.57489	14.6337	1.77858e-16	9.8319e-15	27.2509
ENSG00000183963	TXN	0.840423	9.60223	14.5965	1.92048e-16	1.05735e-14	27.0614
ENSG00000143158	CREBZF	-1.12601	6.8025	-14.5927	1.9355e-16	1.06134e-14	27.4114
ENSG00000111678	ARGLU1	-1.2034	7.09402	-14.5763	2.0024e-16	1.09363e-14	27.3639
ENSG00000124181	SLC25A3	0.605012	9.66458	14.5666	2.04307e-16	1.1114e-14	26.9932
ENSG00000206190	TPI1	0.66607	9.81303	14.5386	2.16516e-16	1.17314e-14	26.9079
ENSG00000157514	ENC1	-1.15418	6.45191	-14.5323	2.19351e-16	1.1838e-14	27.2978
ENSG00000142207	TFPI	1.33488	5.26547	14.5237	2.23299e-16	1.20037e-14	27.2975
ENSG00000167508	UTP20	-1.24823	6.54725	-14.5217	2.24223e-16	1.2006e-14	27.2862
ENSG00000169174	AKR1B1	0.618558	11.6133	14.5101	2.29672e-16	1.22497e-14	26.6333
ENSG00000130702	RPL3	0.595223	9.99167	14.4913	2.38852e-16	1.26899e-14	26.8007
ENSG00000104537	CDC42EP4	0.951203	6.6473	14.4881	2.40417e-16	1.27235e-14	27.1381
ENSG00000188549	PRPF38B	-1.44912	5.93471	-14.4842	2.42388e-16	1.27783e-14	27.2014
ENSG00000047346	MALT1	-1.28857	6.5059	-14.4709	2.49175e-16	1.30855e-14	27.1831
ENSG00000153029	UBB	0.879729	8.6928	14.4501	2.60221e-16	1.36132e-14	26.8709
ENSG00000132680	GDF15	1.48021	5.16378	14.4261	2.73538e-16	1.42553e-14	27.0864
ENSG00000183337	GABARAPL1	1.72679	4.92592	14.3997	2.88998e-16	1.49469e-14	26.9254
ENSG00000170385	SERF2	0.936246	7.57009	14.4012	2.88144e-16	1.49469e-14	26.8559
ENSG00000163629	RRBP1	-1.13674	7.28415	-14.3885	2.9585e-16	1.52435e-14	26.9504
ENSG00000105821	MYBBP1A	-1.27825	6.74854	-14.3426	3.25664e-16	1.67166e-14	26.8957
ENSG00000125657	PLOD2	-0.744865	8.26294	-14.337	3.29497e-16	1.685e-14	26.7314
ENSG00000124429	FBXO32	3.01203	2.91547	14.3286	3.35348e-16	1.70852e-14	26.0107
ENSG00000117305	RHOA	0.597183	9.357	14.2939	3.60672e-16	1.83071e-14	26.4524
ENSG00000138778	COX6B1	0.911687	8.6227	14.2787	3.72369e-16	1.88308e-14	26.4892
ENSG00000138834	BAG1	0.988303	6.443	14.2746	3.75575e-16	1.89229e-14	26.7134
ENSG00000223803	LARP1	-0.937006	8.14848	-14.2713	3.78138e-16	1.8982e-14	26.5996
ENSG00000149639	MGST3	0.982367	7.00751	14.2661	3.82293e-16	1.91202e-14	26.6396
ENSG00000179674	S100A16	0.721936	8.58451	14.2617	3.85889e-16	1.92297e-14	26.4455
ENSG00000151835	CYSTM1	0.964994	6.71251	14.2341	4.08932e-16	2.03038e-14	26.5997
ENSG00000175155	RPS13	0.760839	9.29645	14.229	4.13363e-16	2.04495e-14	26.3192
ENSG00000162772	NCL	-0.587683	10.328	-14.2226	4.18987e-16	2.06529e-14	26.2295
ENSG00000134815	UBALD2	1.49139	4.54229	14.2182	4.22862e-16	2.07689e-14	26.6328
ENSG00000215252	MICU1	0.835718	6.97295	14.2073	4.32685e-16	2.11752e-14	26.5153
ENSG00000172794	POLE	-1.24146	6.57657	-14.1991	4.40235e-16	2.14677e-14	26.6086
ENSG00000135241	COX4I1	0.716976	8.57395	14.1902	4.48534e-16	2.17173e-14	26.3109
ENSG00000198915	YWHAQ	0.530803	9.97882	14.1915	4.47334e-16	2.17173e-14	26.1658
ENSG00000123200	GULP1	1.21693	5.21134	14.1717	4.66465e-16	2.24509e-14	26.5677
ENSG00000116954	SLFN5	1.65825	4.43724	14.1711	4.66973e-16	2.24509e-14	26.49
ENSG00000135763	RBM14	-1.2884	6.31611	-14.1478	4.9056e-16	2.35021e-14	26.5027
ENSG00000113916	ID1	-1.24311	6.40467	-14.1404	4.98324e-16	2.37906e-14	26.4954
ENSG00000108773	CDCA7	-1.22146	5.99885	-14.1328	5.06393e-16	2.40916e-14	26.4831
ENSG00000114857	HIGD2A	1.04164	5.98452	14.1292	5.102e-16	2.41884e-14	26.4399
ENSG00000049249	PLD1	1.56438	4.40873	14.1246	5.15209e-16	2.43414e-14	26.4155
ENSG00000103034	GCN1	-0.927483	7.88562	-14.1211	5.19114e-16	2.44413e-14	26.2965
ENSG00000101412	TMSB4X	0.795413	10.3913	14.1093	5.32176e-16	2.49702e-14	25.9108
ENSG00000187800	EZH2	-1.12569	6.45995	-14.1065	5.35345e-16	2.50148e-14	26.4172
ENSG00000164855	PFKFB3	-0.729234	8.68765	-14.1052	5.3679e-16	2.50148e-14	26.1486
ENSG00000167740	LAMB1	-0.655792	8.86744	-14.0972	5.45987e-16	2.53568e-14	26.1164
ENSG00000092853	NA	1.01443	7.12347	14.0695	5.79064e-16	2.68018e-14	26.2047
ENSG00000166402	APRT	0.804405	7.56314	14.0624	5.87865e-16	2.71172e-14	26.1368
ENSG00000090615	SREK1	-1.28429	6.79405	-14.0555	5.9652e-16	2.74238e-14	26.2977
ENSG00000141542	OSGIN2	0.917361	6.79879	14.047	6.07344e-16	2.78029e-14	26.2115
ENSG00000119681	MMP7	0.822739	7.28883	14.0459	6.08838e-16	2.78029e-14	26.1364
ENSG00000132424	MYEOV	-0.903664	6.78523	-14.026	6.3517e-16	2.89087e-14	26.1667
ENSG00000171368	BHLHE40	0.808269	7.09318	14.0225	6.39794e-16	2.90224e-14	26.1159
ENSG00000258655	MORC4	-0.779159	8.65944	-14.0018	6.68647e-16	3.02308e-14	25.9441
ENSG00000198853	VAV3	1.45119	4.58537	13.9943	6.79429e-16	3.06169e-14	26.1933
ENSG00000107960	NCOR2	-1.35357	7.17484	-13.9835	6.95285e-16	3.12284e-14	26.0934
ENSG00000171346	NPC1	0.829752	7.00727	13.9613	7.2901e-16	3.25291e-14	25.9991
ENSG00000109511	RPL32	0.725336	9.54687	13.962	7.27834e-16	3.25291e-14	25.7196
ENSG00000105327	ATRAID	0.7953	6.94507	13.9537	7.40925e-16	3.29531e-14	25.9704
ENSG00000130844	HMOX1	0.99531	6.84204	13.9467	7.51997e-16	3.33369e-14	25.9855
ENSG00000175505	MTCH2	0.731067	7.56505	13.9422	7.59366e-16	3.35546e-14	25.8757
ENSG00000198837	KIFC3	-1.12966	7.54849	-13.9377	7.66631e-16	3.37664e-14	25.9519
ENSG00000065526	ELOB	0.857149	7.32191	13.9217	7.93252e-16	3.48266e-14	25.8653
ENSG00000232956	RAB9A	1.33512	5.40448	13.9172	8.00967e-16	3.50526e-14	26.0279
ENSG00000161647	MYH9	-0.865639	9.90021	-13.9134	8.07461e-16	3.52239e-14	25.6314
ENSG00000170500	TMSB10	0.696421	10.3157	13.9006	8.29883e-16	3.60867e-14	25.4806
ENSG00000106003	KCTD15	-1.44081	6.30227	-13.8364	9.52436e-16	4.12843e-14	25.8575
ENSG00000272333	MACF1	-0.918966	7.50973	-13.8317	9.61955e-16	4.1565e-14	25.7155
ENSG00000165724	ASAH1	0.750156	7.39472	13.8207	9.84993e-16	4.24262e-14	25.6477
ENSG00000198715	AKR1A1	0.953061	6.48324	13.7981	1.03403e-15	4.42592e-14	25.6888
ENSG00000129347	YWHAG	-0.66313	8.94165	-13.7985	1.03325e-15	4.42592e-14	25.4903
ENSG00000118523	GSTP1	0.757685	9.30111	13.7807	1.07358e-15	4.58084e-14	25.3398
ENSG00000257671	RPL10A	0.652473	9.03235	13.7759	1.0848e-15	4.61428e-14	25.3743
ENSG00000103335	AP2S1	0.829843	7.58422	13.7715	1.09505e-15	4.64341e-14	25.5098
ENSG00000085831	PDLIM1	0.78232	7.97431	13.7579	1.12768e-15	4.76698e-14	25.4324
ENSG00000139428	ATP5F1A	0.601515	9.09997	13.7555	1.13354e-15	4.77696e-14	25.306
ENSG00000150990	UFC1	1.06839	6.39233	13.7504	1.14608e-15	4.81495e-14	25.5972
ENSG00000110237	GEMIN4	-1.02908	6.89355	-13.7464	1.15602e-15	4.8418e-14	25.5894
ENSG00000102882	VCL	-0.666298	9.10506	-13.7294	1.19918e-15	5.0072e-14	25.2975
ENSG00000164938	CCDC14	-1.27264	6.90198	-13.7147	1.23776e-15	5.15253e-14	25.5569
ENSG00000102908	RPL12	0.722307	9.09139	13.7068	1.25915e-15	5.22566e-14	25.2123
ENSG00000130433	SEPHS2	0.855946	6.89571	13.6823	1.32771e-15	5.49351e-14	25.3888
ENSG00000223749	MEG3	-2.28145	5.55933	-13.6657	1.37628e-15	5.67728e-14	25.3102
ENSG00000141258	BNIP3L	1.28722	5.86821	13.6533	1.41357e-15	5.81352e-14	25.4436
ENSG00000028310	PPRC1	-1.32491	6.2205	-13.6429	1.44575e-15	5.92802e-14	25.4429
ENSG00000171163	ACAT2	1.11573	5.62661	13.639	1.45819e-15	5.96111e-14	25.4129
ENSG00000204682	UBASH3B	-1.05653	6.95194	-13.6353	1.46992e-15	5.99112e-14	25.373
ENSG00000139437	RPL7A	0.576825	9.93914	13.6334	1.47599e-15	5.99798e-14	24.949
ENSG00000196739	PLA2G4A	1.19441	5.84623	13.613	1.54289e-15	6.2512e-14	25.3462
ENSG00000133858	ERG28	1.17928	5.47155	13.6007	1.58469e-15	6.4016e-14	25.338
ENSG00000165030	WDR43	-0.879796	7.45474	-13.5963	1.59969e-15	6.44312e-14	25.2237
ENSG00000158092	LRP8	-1.24324	6.07754	-13.5762	1.67132e-15	6.71181e-14	25.3001
ENSG00000188158	GSTO1	0.781249	7.30914	13.5722	1.68572e-15	6.73006e-14	25.1064
ENSG00000167280	PSMB4	0.652157	8.44069	13.5733	1.68193e-15	6.73006e-14	24.9972
ENSG00000103326	ETS2	0.685841	7.65516	13.544	1.79253e-15	7.13563e-14	24.9984
ENSG00000145979	SRSF2	-0.722794	8.34327	-13.5347	1.82958e-15	7.26193e-14	24.959
ENSG00000158825	NRP2	-0.825082	7.31917	-13.5154	1.90797e-15	7.55112e-14	25.0247
ENSG00000176953	LIPA	0.84854	6.97565	13.5067	1.94476e-15	7.6745e-14	24.9963
ENSG00000121716	CLTA	0.63977	8.31279	13.4858	2.03533e-15	8.00874e-14	24.809
ENSG00000159167	CTSB	0.559921	9.23775	13.4412	2.24393e-15	8.80419e-14	24.6038
ENSG00000164045	SPNS2	3.6156	2.26961	13.4385	2.25726e-15	8.83112e-14	23.2692
ENSG00000135211	YPEL5	1.14322	5.86074	13.4365	2.26718e-15	8.84461e-14	24.9722
ENSG00000145220	COX7C	0.788326	8.19864	13.4296	2.30213e-15	8.95536e-14	24.6942
ENSG00000125726	BAZ1B	-0.809742	7.89327	-13.4221	2.34014e-15	9.07733e-14	24.7811
ENSG00000163565	NSDHL	1.04218	6.10898	13.4153	2.37531e-15	9.18768e-14	24.8943
ENSG00000103540	PLAAT3	0.937041	6.37852	13.4103	2.40161e-15	9.23706e-14	24.8493
ENSG00000056558	HP1BP3	-0.730084	7.70634	-13.4107	2.3994e-15	9.23706e-14	24.7624
ENSG00000196700	AKR1C1	1.03882	8.78424	13.3829	2.5502e-15	9.78101e-14	24.4962
ENSG00000185697	HADHB	0.744869	7.44749	13.3738	2.60205e-15	9.95192e-14	24.6556
ENSG00000103064	C1orf43	0.656835	8.25023	13.3692	2.62832e-15	1.00243e-13	24.5544
ENSG00000173064	SOD1	0.712529	8.24406	13.3563	2.70424e-15	1.02851e-13	24.5457
ENSG00000136603	CDKN1A	0.849624	7.42631	13.3533	2.7217e-15	1.03228e-13	24.647
ENSG00000254004	IRS1	-1.11348	6.27883	-13.3486	2.75028e-15	1.04023e-13	24.7757
ENSG00000087448	RPL4	0.472592	11.0535	13.3178	2.94298e-15	1.11004e-13	24.1199
ENSG00000013573	UHRF1	-1.7839	5.12879	-13.3148	2.96288e-15	1.11447e-13	24.668
ENSG00000179913	RPS27A	0.762333	9.72792	13.2862	3.15603e-15	1.18386e-13	24.2078
ENSG00000154237	VPS25	0.819081	7.04966	13.2838	3.17238e-15	1.18673e-13	24.4973
ENSG00000171159	SSR2	0.708504	7.70743	13.2699	3.27119e-15	1.22035e-13	24.3881
ENSG00000264112	TSG101	0.806399	6.95087	13.2322	3.55587e-15	1.32294e-13	24.3969
ENSG00000110274	EZR	-0.568909	9.26106	-13.2238	3.62283e-15	1.34419e-13	24.152
ENSG00000167548	BANF1	0.710961	7.57262	13.212	3.71836e-15	1.37589e-13	24.274
ENSG00000125398	TNIP1	0.83964	7.07234	13.1831	3.96483e-15	1.46313e-13	24.2859
ENSG00000173727	HTATIP2	0.731332	7.67393	13.1671	4.10818e-15	1.51194e-13	24.1607
ENSG00000280435	TNRC6A	-1.03931	6.82745	-13.1645	4.13174e-15	1.51653e-13	24.3433
ENSG00000130695	SLC25A37	-0.878352	6.82476	-13.1388	4.37506e-15	1.60153e-13	24.2769
ENSG00000177034	ACTN4	-0.601726	10.7997	-13.1139	4.62494e-15	1.68847e-13	23.7155
ENSG00000196584	ARSE	1.05353	5.56865	13.1074	4.69189e-15	1.70835e-13	24.2504
ENSG00000146232	RAB27B	0.93057	6.48099	13.0959	4.81334e-15	1.74791e-13	24.1313
ENSG00000169129	NA	0.768072	7.31437	13.0934	4.84053e-15	1.75312e-13	24.0484
ENSG00000105204	NUAK2	-1.62972	5.54619	-13.0916	4.86063e-15	1.75574e-13	24.2333
ENSG00000164211	PFN1	0.655691	10.5959	13.0828	4.95687e-15	1.78578e-13	23.6264
ENSG00000125351	SARAF	0.640503	8.18527	13.0664	5.14123e-15	1.84732e-13	23.8904
ENSG00000104859	EIF4G1	-0.740693	8.54359	-13.0473	5.36545e-15	1.92283e-13	23.8375
ENSG00000061273	CMIP	-1.05766	6.84822	-13.0317	5.55634e-15	1.98603e-13	24.0415
ENSG00000174327	CAVIN1	-0.589668	9.19481	-13.0193	5.71192e-15	2.03631e-13	23.6749
ENSG00000125652	TNPO2	-1.32407	5.99914	-13.0051	5.89731e-15	2.09692e-13	24.0534
ENSG00000077092	GHITM	0.574285	8.88368	13.0035	5.91768e-15	2.0987e-13	23.6743
ENSG00000281398	RPL39	1.0034	7.05212	12.9934	6.05381e-15	2.14142e-13	23.8558
ENSG00000165861	ENAH	-0.946162	7.17137	-12.9921	6.07118e-15	2.14201e-13	23.9139
ENSG00000149782	KLHL24	2.59181	2.51827	12.9879	6.12842e-15	2.15663e-13	23.071
ENSG00000068079	BTF3	0.645402	9.27865	12.9867	6.14505e-15	2.15693e-13	23.5857
ENSG00000110104	OCIAD2	0.91265	6.61473	12.9844	6.17766e-15	2.16282e-13	23.8752
ENSG00000107938	DUSP5	1.09151	5.43801	12.9509	6.65993e-15	2.3257e-13	23.9115
ENSG00000137486	ANAPC11	0.848336	7.03245	12.9302	6.97698e-15	2.42401e-13	23.6963
ENSG00000100290	BCAP31	0.688561	8.50042	12.9304	6.97407e-15	2.42401e-13	23.5367
ENSG00000144583	RAB32	1.07857	5.57783	12.9195	7.14632e-15	2.47654e-13	23.834
ENSG00000131002	SIRPA	-1.09381	6.23551	-12.9171	7.18512e-15	2.48369e-13	23.8326
ENSG00000253227	SPG21	0.665045	7.67606	12.9152	7.21652e-15	2.48824e-13	23.5923
ENSG00000197355	CETN2	0.921523	6.92005	12.9035	7.40853e-15	2.54801e-13	23.6517
ENSG00000160299	KIRREL1	-0.879881	7.09052	-12.8895	7.64662e-15	2.62329e-13	23.6687
ENSG00000128159	RPS29	0.772474	8.6006	12.8785	7.8375e-15	2.68204e-13	23.4086
ENSG00000140451	ARPC3	0.71837	7.86016	12.8703	7.98356e-15	2.72519e-13	23.4685
ENSG00000144452	BDNF	-2.71554	4.18504	-12.8672	8.04011e-15	2.73765e-13	22.8597
ENSG00000049130	ARL6IP5	0.788737	6.94245	12.8637	8.10458e-15	2.75273e-13	23.5497
ENSG00000102870	COX7A2L	0.712694	7.2778	12.8507	8.34472e-15	2.82727e-13	23.5019
ENSG00000148677	FKBP1A	0.625489	8.39921	12.8472	8.41105e-15	2.84269e-13	23.3556
ENSG00000223959	SRSF6	-0.775098	7.5128	-12.8426	8.49962e-15	2.86553e-13	23.5251
ENSG00000178773	PPIG	-1.31433	6.3021	-12.8315	8.71478e-15	2.93083e-13	23.6533
ENSG00000215041	MCM10	-1.2421	6.22372	-12.8254	8.83593e-15	2.96427e-13	23.6367
ENSG00000164124	CAPNS1	0.563618	9.62835	12.8234	8.87569e-15	2.97031e-13	23.1593
ENSG00000163993	PLP2	0.748157	7.75207	12.8016	9.32421e-15	3.11278e-13	23.3152
ENSG00000136826	SNRPD2	0.734408	8.41167	12.7997	9.36487e-15	3.11873e-13	23.2392
ENSG00000173156	LDLR	1.10073	6.02312	12.7941	9.48579e-15	3.15131e-13	23.523
ENSG00000025039	CDK6	-1.10489	6.20033	-12.7734	9.9406e-15	3.29439e-13	23.5253
ENSG00000180537	TRMT112	0.811122	7.1682	12.7708	9.99975e-15	3.30597e-13	23.3296
ENSG00000137203	PUM3	-0.914597	6.71278	-12.761	1.02232e-14	3.37169e-13	23.4421
ENSG00000214530	HADHA	0.648861	7.98012	12.7575	1.03048e-14	3.3904e-13	23.2021
ENSG00000101104	SRRT	-0.97298	7.22068	-12.7444	1.06152e-14	3.48414e-13	23.3312
ENSG00000257698	SEMA3C	-0.741972	7.78943	-12.7319	1.09214e-14	3.57603e-13	23.2236
ENSG00000119917	BRI3	1.07364	5.68066	12.705	1.16096e-14	3.78324e-13	23.3389
ENSG00000088899	PSMB5	0.643586	8.34127	12.7055	1.15974e-14	3.78324e-13	23.0431
ENSG00000197774	COPZ1	0.627285	8.35702	12.7037	1.16456e-14	3.78593e-13	23.0325
ENSG00000115363	LAPTM4A	0.651288	8.18659	12.6985	1.17827e-14	3.8214e-13	23.038
ENSG00000099860	GLI2	-2.05606	4.69097	-12.6968	1.18288e-14	3.82727e-13	23.0883
ENSG00000084710	POLR1A	-0.892981	6.82357	-12.6846	1.21615e-14	3.9256e-13	23.2447
ENSG00000135124	NBR1	0.702148	7.28447	12.6804	1.22809e-14	3.95481e-13	23.1084
ENSG00000099326	ALDH1A1	0.351246	13.2402	12.6788	1.23248e-14	3.95958e-13	22.3779
ENSG00000225614	EIF1	0.624274	9.07016	12.6713	1.25366e-14	4.01818e-13	22.8996
ENSG00000184916	ITM2B	0.644709	7.68762	12.6671	1.26568e-14	4.04722e-13	23.032
ENSG00000113369	AXL	-0.648274	8.30158	-12.6502	1.31545e-14	4.19653e-13	22.9432
ENSG00000099814	ATP6V1F	0.879476	6.43599	12.6355	1.36026e-14	4.32937e-13	23.103
ENSG00000148400	RRP1B	-0.936593	6.51299	-12.6214	1.405e-14	4.46138e-13	23.1279
ENSG00000152766	SSR4	0.780756	7.74879	12.6022	1.46789e-14	4.65024e-13	22.856
ENSG00000171246	CIB1	0.679289	7.88276	12.5886	1.51442e-14	4.78654e-13	22.8101
ENSG00000186469	RPS20	0.808034	9.09699	12.5811	1.54044e-14	4.85756e-13	22.6649
ENSG00000175197	ID2	-1.1585	6.1814	-12.5783	1.55059e-14	4.8783e-13	23.0768
ENSG00000168646	MVK	1.65118	4.13632	12.5696	1.58154e-14	4.95282e-13	23.0584
ENSG00000124067	SEC61B	0.795812	7.22169	12.5696	1.5815e-14	4.95282e-13	22.8615
ENSG00000010322	KPNB1	-0.546367	9.44325	-12.5569	1.62828e-14	5.08755e-13	22.6016
ENSG00000101665	RPS6	0.623671	10.5995	12.5517	1.64808e-14	5.13765e-13	22.4157
ENSG00000100034	FA2H	1.01447	5.87318	12.514	1.79701e-14	5.58887e-13	22.8763
ENSG00000136999	RPL31	0.724701	8.9927	12.513	1.80101e-14	5.58887e-13	22.5203
ENSG00000168016	GSTZ1	1.19274	4.97722	12.5077	1.82316e-14	5.64477e-13	22.94
ENSG00000174130	PLPP2	0.963042	6.68202	12.5021	1.84673e-14	5.69336e-13	22.7432
ENSG00000149970	TMEM14C	0.757198	7.42112	12.502	1.84719e-14	5.69336e-13	22.6817
ENSG00000161996	CTSS	1.05361	5.5132	12.4838	1.92612e-14	5.92324e-13	22.8466
ENSG00000184465	RPL36	0.679834	8.06658	12.4758	1.96168e-14	6.01907e-13	22.5364
ENSG00000217801	TIMP1	0.795889	7.59782	12.468	1.99751e-14	6.11523e-13	22.5636
ENSG00000056972	HAS3	-1.07138	5.5529	-12.451	2.07703e-14	6.34447e-13	22.7948
ENSG00000160953	IL6R	1.4636	4.38589	12.4324	2.16829e-14	6.59372e-13	22.7596
ENSG00000063587	DIO2	-2.09079	4.6456	-12.4328	2.1662e-14	6.59372e-13	22.5624
ENSG00000123933	BICD2	-1.19738	5.98523	-12.4036	2.31754e-14	7.03193e-13	22.6926
ENSG00000163898	KIF18B	-1.11861	6.11486	-12.4002	2.33571e-14	7.07135e-13	22.6586
ENSG00000132613	SAT2	0.998382	5.72861	12.3933	2.3733e-14	7.16925e-13	22.6302
ENSG00000019144	SRSF1	-0.930465	7.02539	-12.3889	2.39759e-14	7.22663e-13	22.5385
ENSG00000269343	CNN2	-1.13345	6.0724	-12.3734	2.48494e-14	7.47342e-13	22.6139
ENSG00000198743	EGFR	-0.713909	8.20212	-12.3707	2.50068e-14	7.50423e-13	22.3356
ENSG00000158286	PDZD11	0.860468	6.24567	12.3688	2.51145e-14	7.52002e-13	22.5136
ENSG00000184402	WBP2	0.935684	6.69555	12.3592	2.56811e-14	7.67285e-13	22.4549
ENSG00000104936	RPL37	0.733288	9.67869	12.3512	2.61583e-14	7.79837e-13	22.0626
ENSG00000135111	EIF3L	0.699021	7.51837	12.3354	2.71378e-14	8.0552e-13	22.2793
ENSG00000259120	PSAP	0.476736	10.5406	12.3356	2.71229e-14	8.0552e-13	21.9267
ENSG00000135541	CCDC28A	1.71231	3.99534	12.3308	2.74259e-14	8.12307e-13	22.4357
ENSG00000176155	CEACAM6	0.748469	7.35042	12.3252	2.77875e-14	8.21234e-13	22.2605
ENSG00000140265	DAD1	0.791987	7.66217	12.312	2.86506e-14	8.44915e-13	22.1916
ENSG00000135409	DUSP16	1.14438	5.37608	12.311	2.87209e-14	8.45161e-13	22.4652
ENSG00000114541	CLDN4	2.27906	3.00587	12.3094	2.88256e-14	8.4642e-13	22.1318
ENSG00000265763	MDN1	-1.55539	5.79971	-12.2846	3.05334e-14	8.94641e-13	22.4326
ENSG00000162714	SEC11A	0.662743	8.53359	12.2719	3.14509e-14	9.1955e-13	22.0054
ENSG00000127586	CD276	0.992343	5.65005	12.2634	3.20763e-14	9.35832e-13	22.3252
ENSG00000128039	SETD2	-0.996591	6.37679	-12.2595	3.23702e-14	9.42394e-13	22.3261
ENSG00000179750	MPDU1	0.694889	7.37611	12.2584	3.24542e-14	9.42828e-13	22.1019
ENSG00000166311	CAPRIN2	-1.37573	5.71116	-12.2434	3.36071e-14	9.7425e-13	22.3373
ENSG00000244879	NDUFA4	0.837378	8.10553	12.2387	3.39758e-14	9.82852e-13	21.983
ENSG00000162105	IRF2BP2	1.01062	6.18128	12.2363	3.4167e-14	9.86291e-13	22.1942
ENSG00000117877	GPCPD1	1.07499	5.50944	12.2287	3.47763e-14	1.00176e-12	22.2653
ENSG00000229119	NSD2	-0.719021	7.52891	-12.2211	3.53999e-14	1.01758e-12	22.0655
ENSG00000132196	AHCTF1	-1.19802	5.96255	-12.22	3.54926e-14	1.0181e-12	22.276
ENSG00000169242	FBN2	-0.89342	6.87439	-12.2133	3.60523e-14	1.03199e-12	22.1293
ENSG00000133624	FGFR1	-0.999308	6.81568	-12.2096	3.63667e-14	1.03881e-12	22.1531
ENSG00000169220	CAPG	0.862672	6.39049	12.2062	3.66493e-14	1.0447e-12	22.1111
ENSG00000188807	B2M	1.03402	5.80697	12.1995	3.72326e-14	1.05911e-12	22.1733
ENSG00000219507	GOLGA4	-0.983034	7.36887	-12.1909	3.79895e-14	1.0784e-12	22.0392
ENSG00000057294	MVP	0.749824	7.45624	12.1879	3.82512e-14	1.08357e-12	21.8988
ENSG00000185219	ATP5PD	0.880463	7.46927	12.1723	3.96731e-14	1.12152e-12	21.8942
ENSG00000215908	RND1	1.41111	4.74213	12.1566	4.11587e-14	1.16112e-12	22.1328
ENSG00000142089	NA	0.686462	7.64718	12.1398	4.28089e-14	1.20518e-12	21.7843
ENSG00000186166	DGKD	-1.05028	6.73975	-12.136	4.31958e-14	1.21357e-12	21.9914
ENSG00000197905	SMC4	-0.764475	8.30253	-12.1271	4.40988e-14	1.2364e-12	21.7468
ENSG00000099904	TNFRSF12A	-0.751078	8.09318	-12.1221	4.46208e-14	1.24847e-12	21.7562
ENSG00000174233	BCL2L13	0.897989	6.36884	12.12	4.48461e-14	1.25221e-12	21.9182
ENSG00000070540	NA	0.664239	8.40052	12.1169	4.51741e-14	1.25879e-12	21.6564
ENSG00000186567	PARP6	-1.02834	6.1317	-12.1152	4.53471e-14	1.26104e-12	22.0077
ENSG00000198517	RPL38	0.82159	9.05584	12.1101	4.58973e-14	1.27374e-12	21.559
ENSG00000164463	NOL6	-1.0183	6.78107	-12.1071	4.62219e-14	1.28015e-12	21.9092
ENSG00000130517	SNHG12	-1.72092	5.15831	-12.1043	4.65277e-14	1.28536e-12	21.9716
ENSG00000165171	SEC16A	-0.924918	7.43124	-12.1036	4.65984e-14	1.28536e-12	21.8167
ENSG00000161642	COX6A1	0.840562	6.66235	12.0892	4.82044e-14	1.32698e-12	21.8085
ENSG00000166920	PARK7	0.696783	8.19684	12.0834	4.8864e-14	1.34243e-12	21.5911
ENSG00000156983	CD9	0.787548	7.25284	12.0731	5.00669e-14	1.37272e-12	21.6573
ENSG00000260401	BEX3	0.687488	7.21174	12.0599	5.16388e-14	1.41298e-12	21.6498
ENSG00000176046	GPRC5C	1.1181	6.09563	12.0354	5.47117e-14	1.49407e-12	21.731
ENSG00000204271	PHB	0.647732	7.92035	12.0321	5.5137e-14	1.50268e-12	21.5055
ENSG00000108465	CPPED1	0.704139	6.83497	12.0243	5.6164e-14	1.52762e-12	21.6076
ENSG00000273297	PSMB6	0.601441	8.18867	12.018	5.70031e-14	1.54736e-12	21.4434
ENSG00000173281	XRCC6	0.493142	9.28528	12.0162	5.7244e-14	1.55081e-12	21.3129
ENSG00000171316	NSD1	-0.816593	6.95976	-12.0144	5.74791e-14	1.55383e-12	21.6647
ENSG00000129173	NDUFB9	0.824541	6.94095	12.0137	5.75831e-14	1.55383e-12	21.5951
ENSG00000149716	WWTR1	-0.66305	7.76782	-12.0079	5.83695e-14	1.57195e-12	21.5104
ENSG00000187605	PHLDA1	-0.960253	6.05507	-12.0053	5.87288e-14	1.57851e-12	21.745
ENSG00000162601	TONSL	-1.49432	5.20237	-11.9907	6.0787e-14	1.63062e-12	21.7457
ENSG00000120549	ZBTB18	-1.3561	5.05498	-11.9888	6.1063e-14	1.63481e-12	21.7396
ENSG00000020577	FOSL1	-1.44256	6.11363	-11.9772	6.27606e-14	1.67697e-12	21.7156
ENSG00000183729	ZFR	-0.761407	7.36805	-11.9756	6.30022e-14	1.68014e-12	21.5177
ENSG00000213903	LURAP1L	1.66384	4.16329	11.9746	6.31473e-14	1.68073e-12	21.6574
ENSG00000079257	CDK12	-0.915267	6.9275	-11.9684	6.40784e-14	1.70219e-12	21.5697
ENSG00000140678	DDX58	1.27697	4.50217	11.9459	6.75852e-14	1.78663e-12	21.6484
ENSG00000185875	DHCR24	0.887561	6.2847	11.9455	6.76496e-14	1.78663e-12	21.5033
ENSG00000187185	S100A3	0.862389	6.20743	11.9456	6.76315e-14	1.78663e-12	21.4979
ENSG00000234771	RPS7	0.637859	8.51465	11.942	6.8202e-14	1.79774e-12	21.2232
ENSG00000118412	VKORC1L1	-0.865517	6.50499	-11.9384	6.87911e-14	1.80978e-12	21.5359
ENSG00000104951	SMG1	-0.950756	7.35286	-11.9346	6.94136e-14	1.82264e-12	21.4538
ENSG00000137266	THBD	-1.27502	5.27872	-11.9156	7.26105e-14	1.90292e-12	21.5729
ENSG00000273117	PPIA	0.696637	9.24063	11.9136	7.29482e-14	1.90811e-12	21.0638
ENSG00000134030	MTA2	-0.849957	6.72314	-11.9097	7.36251e-14	1.92214e-12	21.431
ENSG00000152348	SERPINH1	-0.848833	7.63295	-11.9076	7.39924e-14	1.92804e-12	21.3549
ENSG00000110852	TSPO	0.886628	6.47631	11.9066	7.41777e-14	1.92919e-12	21.3727
ENSG00000227471	MBP	0.863242	5.87949	11.9033	7.47518e-14	1.94042e-12	21.4649
ENSG00000087510	MAN2A2	-1.36931	5.74634	-11.8869	7.77144e-14	2.0135e-12	21.5082
ENSG00000170786	GLUL	1.24567	4.92747	11.8749	7.99756e-14	2.06816e-12	21.4772
ENSG00000204946	SNHG29	0.643837	8.66162	11.8673	8.14154e-14	2.10141e-12	21.0324
ENSG00000135549	C14orf132	1.357	4.0096	11.8536	8.41096e-14	2.16668e-12	21.4216
ENSG00000159263	LCN2	1.05177	5.37508	11.8527	8.43022e-14	2.16668e-12	21.3838
ENSG00000186832	SMG5	-0.899593	7.00943	-11.8521	8.44202e-14	2.16668e-12	21.2876
ENSG00000134508	NCOR1	-0.810896	7.67604	-11.8482	8.52128e-14	2.18292e-12	21.1751
ENSG00000156966	SNX12	0.727119	6.85243	11.8382	8.72583e-14	2.23113e-12	21.1714
ENSG00000142303	ATP13A3	-0.957912	6.98405	-11.8296	8.90604e-14	2.27295e-12	21.2265
ENSG00000205476	PSENEN	1.00973	6.22006	11.8274	8.95377e-14	2.28087e-12	21.218
ENSG00000162645	NOP10	0.736126	7.51812	11.8258	8.98693e-14	2.28506e-12	21.0548
ENSG00000135441	C1QTNF6	1.38994	4.33936	11.8226	9.05515e-14	2.29386e-12	21.3586
ENSG00000188566	RRP12	-0.948294	6.53152	-11.8229	9.05031e-14	2.29386e-12	21.2685
ENSG00000005187	OLFM1	1.52068	4.30896	11.8113	9.30368e-14	2.35245e-12	21.3257
ENSG00000073737	ATP6V0B	0.810534	6.82567	11.8092	9.34944e-14	2.35965e-12	21.1113
ENSG00000165684	CDK4	0.730966	7.07434	11.8064	9.41185e-14	2.37102e-12	21.0586
ENSG00000227619	MPC2	1.03221	6.25565	11.796	9.64909e-14	2.4248e-12	21.1469
ENSG00000247271	DDX42	-0.613802	8.08756	-11.7955	9.66084e-14	2.4248e-12	20.9801
ENSG00000139618	CEBPB	1.26136	5.53778	11.7933	9.70979e-14	2.43261e-12	21.2358
ENSG00000198707	MAP1B	-0.700828	8.1082	-11.7886	9.81963e-14	2.45563e-12	20.9956
ENSG00000286451	COMMD4	0.770737	7.17768	11.7846	9.91486e-14	2.47491e-12	20.9997
ENSG00000142279	PTGR1	0.653203	8.34477	11.7837	9.9357e-14	2.47559e-12	20.86
ENSG00000227671	JCAD	-1.34208	5.35922	-11.7623	1.04563e-13	2.60056e-12	21.2181
ENSG00000273760	TMEM59	0.71451	7.13739	11.742	1.09775e-13	2.72522e-12	20.9115
ENSG00000133805	SAT1	0.735831	7.60483	11.7361	1.11322e-13	2.75861e-12	20.8739
ENSG00000167378	C12orf57	1.0157	5.63728	11.7299	1.12997e-13	2.79504e-12	21.0618
ENSG00000164086	UXT	0.829568	6.14227	11.7163	1.16722e-13	2.88197e-12	20.9747
ENSG00000012124	ATP6V1B2	0.72172	6.91524	11.7076	1.19198e-13	2.93248e-12	20.8608
ENSG00000188878	LMNB2	-0.765257	7.91563	-11.7077	1.19165e-13	2.93248e-12	20.7635
ENSG00000162065	SETD5	-0.926797	6.66336	-11.7055	1.19776e-13	2.94141e-12	20.9885
ENSG00000244649	CEP250	-1.10711	5.86982	-11.6906	1.24147e-13	3.04328e-12	21.0249
ENSG00000119922	TSKU	0.675241	7.84786	11.6897	1.24403e-13	3.04408e-12	20.674
ENSG00000236753	GBE1	0.797718	6.46953	11.68	1.27334e-13	3.11024e-12	20.8563
ENSG00000157741	RPS27L	0.782092	8.32849	11.6786	1.27761e-13	3.1151e-12	20.6156
ENSG00000214274	UQCRQ	0.754178	7.61346	11.6708	1.30184e-13	3.16852e-12	20.6719
ENSG00000260565	TSC22D3	1.29928	5.01175	11.6618	1.33016e-13	3.23166e-12	20.9793
ENSG00000146411	URB1	-1.15483	5.70392	-11.661	1.33285e-13	3.23245e-12	20.9691
ENSG00000155324	COX5A	0.720915	7.78147	11.657	1.34578e-13	3.25226e-12	20.6208
ENSG00000146067	TUBA1B	0.646028	9.24917	11.6576	1.34384e-13	3.25226e-12	20.428
ENSG00000206538	FUS	-0.637718	8.99057	-11.6555	1.35053e-13	3.25796e-12	20.5279
ENSG00000188818	PEBP1	0.544116	8.38984	11.648	1.37493e-13	3.31099e-12	20.5168
ENSG00000165215	MVD	1.23046	4.73235	11.6434	1.39034e-13	3.34221e-12	20.9336
ENSG00000196544	RPL34	0.730649	7.75056	11.6364	1.414e-13	3.3931e-12	20.578
ENSG00000177854	COX6C	0.797322	7.31261	11.6339	1.4223e-13	3.40704e-12	20.6341
ENSG00000279806	TMEM50A	0.693708	6.98527	11.6288	1.43996e-13	3.44329e-12	20.6618
ENSG00000267519	RIF1	-1.02535	6.71596	-11.6277	1.44394e-13	3.44678e-12	20.7848
ENSG00000104885	TRIM28	-0.678375	9.02927	-11.6134	1.49438e-13	3.56094e-12	20.4004
ENSG00000166261	ODF2	-0.828455	6.61397	-11.611	1.50306e-13	3.56933e-12	20.7284
ENSG00000155034	GRN	0.774738	7.92852	11.611	1.50312e-13	3.56933e-12	20.4794
ENSG00000076351	IGFBP1	1.29514	4.3783	11.6063	1.52013e-13	3.60345e-12	20.8477
ENSG00000235587	PRKDC	-0.64963	9.04546	-11.6017	1.53725e-13	3.6377e-12	20.3839
ENSG00000169429	FAM214A	1.64285	3.81742	11.5969	1.55508e-13	3.67354e-12	20.7424
ENSG00000100425	IGBP1	0.864907	6.30714	11.5956	1.56002e-13	3.67886e-12	20.6836
ENSG00000247134	QPCT	0.829247	6.25438	11.5865	1.59458e-13	3.75387e-12	20.6615
ENSG00000186577	NINJ1	0.952851	6.01132	11.5847	1.60121e-13	3.76297e-12	20.675
ENSG00000102901	CCDC9B	-1.63817	5.00358	-11.581	1.61557e-13	3.79021e-12	20.7733
ENSG00000103995	NA	0.89854	6.41509	11.5557	1.71747e-13	4.02235e-12	20.561
ENSG00000102780	ARL14	3.04081	2.04507	11.5448	1.76319e-13	4.12237e-12	19.2681
ENSG00000164080	WNK1	-0.69366	7.71921	-11.5403	1.78255e-13	4.15339e-12	20.4162
ENSG00000158062	MRPL51	0.747766	7.70617	11.5407	1.78087e-13	4.15339e-12	20.3363
ENSG00000158805	ANXA13	1.23563	4.94837	11.5329	1.81461e-13	4.2209e-12	20.6417
ENSG00000155265	HEXA	0.810986	6.29582	11.5237	1.85533e-13	4.30827e-12	20.5013
ENSG00000223573	KIF1C	-0.783297	7.48015	-11.5158	1.89133e-13	4.38442e-12	20.3852
ENSG00000131094	AGPAT2	0.942404	6.31987	11.5127	1.90545e-13	4.4022e-12	20.4371
ENSG00000175938	RPS2	0.609923	9.23259	11.5131	1.9038e-13	4.4022e-12	20.087
ENSG00000233476	ATP10A	-2.10171	4.18416	-11.5096	1.91978e-13	4.42431e-12	20.2985
ENSG00000251129	SRSF7	-0.656907	8.1865	-11.5093	1.9215e-13	4.42431e-12	20.2623
ENSG00000138658	SRSF11	-0.905833	7.2174	-11.5082	1.92648e-13	4.42831e-12	20.4176
ENSG00000157214	KHDC4	-1.08589	5.94409	-11.5072	1.93119e-13	4.43168e-12	20.5795
ENSG00000126106	ATP6V1E1	0.739089	6.90048	11.4979	1.97507e-13	4.51719e-12	20.3668
ENSG00000137496	PHPT1	0.745715	6.89953	11.4983	1.97304e-13	4.51719e-12	20.3393
ENSG00000102098	ECHS1	0.615957	7.72357	11.4897	2.01488e-13	4.60054e-12	20.2106
ENSG00000119771	NA	0.864441	6.76125	11.485	2.03766e-13	4.64477e-12	20.3255
ENSG00000214826	SMTN	-1.37794	5.35621	-11.4794	2.06554e-13	4.70047e-12	20.5463
ENSG00000139718	ATP6V0D1	0.864224	6.57717	11.474	2.093e-13	4.75505e-12	20.3333
ENSG00000134533	LAMA5	-1.04644	8.33565	-11.4707	2.1097e-13	4.78502e-12	20.1537
ENSG00000118689	RAB37	2.55495	2.62705	11.4677	2.12488e-13	4.81145e-12	19.9544
ENSG00000164117	CLUH	-0.896289	7.28083	-11.4637	2.14573e-13	4.85062e-12	20.2908
ENSG00000158106	ERP29	0.69659	7.43371	11.4605	2.16242e-13	4.88027e-12	20.1969
ENSG00000171984	MGST1	0.602458	9.47699	11.4457	2.24176e-13	5.051e-12	19.8959
ENSG00000155287	NME1	0.656904	7.68315	11.4427	2.25792e-13	5.07903e-12	20.1023
ENSG00000198270	FBXO7	0.731064	7.055	11.4396	2.27519e-13	5.10945e-12	20.1889
ENSG00000204174	YLPM1	-0.953112	6.23026	-11.4377	2.28548e-13	5.12414e-12	20.3707
ENSG00000057704	NDUFA1	0.857668	7.43262	11.4287	2.33627e-13	5.22942e-12	20.1086
ENSG00000229809	PRDX6	0.562786	8.42642	11.4262	2.35047e-13	5.25258e-12	19.9804
ENSG00000264538	ATP5MC1	0.676805	7.75119	11.4177	2.39966e-13	5.35376e-12	20.0162
ENSG00000250899	PLCG1	-1.00319	5.82043	-11.4112	2.4378e-13	5.42998e-12	20.3555
ENSG00000167702	OPTN	0.920135	6.4297	11.4085	2.45388e-13	5.45688e-12	20.1989
ENSG00000175265	MYO10	-0.758962	7.65053	-11.4075	2.45985e-13	5.46127e-12	20.0999
ENSG00000111696	PTPN13	-1.131	5.61417	-11.4007	2.50075e-13	5.5393e-12	20.3445
ENSG00000228502	UQCRFS1	0.592149	8.18877	11.4003	2.50311e-13	5.5393e-12	19.9358
ENSG00000196247	TUBB	0.632064	7.52442	11.3995	2.50794e-13	5.54101e-12	20.0115
ENSG00000140326	RIPK2	0.895466	5.86286	11.3971	2.52305e-13	5.56538e-12	20.245
ENSG00000075461	DNAJC2	-1.08371	6.58709	-11.3903	2.56487e-13	5.64447e-12	20.2569
ENSG00000128000	ECH1	0.789545	7.15207	11.3899	2.56717e-13	5.64447e-12	20.0245
ENSG00000169169	BCOR	-1.53341	5.1909	-11.3867	2.58741e-13	5.67983e-12	20.3225
ENSG00000068024	LSM4	0.694099	7.31339	11.3843	2.60264e-13	5.69495e-12	19.9926
ENSG00000125266	H2AFZ	0.540102	8.93277	11.3848	2.59943e-13	5.69495e-12	19.7993
ENSG00000163945	NOP58	-0.70551	7.26075	-11.3788	2.63786e-13	5.76279e-12	20.0918
ENSG00000108370	BLVRA	0.806293	6.13209	11.3711	2.68755e-13	5.86194e-12	20.1329
ENSG00000169372	CCDC137	-0.937511	6.4142	-11.3699	2.6955e-13	5.86992e-12	20.1677
ENSG00000008710	UQCRH	0.765757	7.41347	11.3593	2.76605e-13	6.01396e-12	19.941
ENSG00000151150	MR1	1.59787	4.03992	11.3471	2.84959e-13	6.18573e-12	20.2153
ENSG00000284946	MSH6	-0.71926	7.33142	-11.3411	2.89191e-13	6.26765e-12	19.957
ENSG00000140057	HCFC1	-0.976216	6.55503	-11.34	2.89941e-13	6.27393e-12	20.0898
ENSG00000136842	FTSJ3	-0.799405	7.29531	-11.3356	2.93069e-13	6.33159e-12	19.9664
ENSG00000234420	SLC30A1	-1.37164	5.73536	-11.3337	2.94451e-13	6.35141e-12	20.1946
ENSG00000249915	COX7B	0.820813	7.72149	11.3282	2.98434e-13	6.42716e-12	19.8249
ENSG00000074370	TDP2	0.807381	6.34446	11.3237	3.0176e-13	6.47836e-12	20.019
ENSG00000176749	ABHD12	0.670546	7.20091	11.3242	3.01396e-13	6.47836e-12	19.8697
ENSG00000217027	TNFSF9	1.51488	4.33192	11.3155	3.07886e-13	6.59948e-12	20.1467
ENSG00000134827	SOGA1	-1.1098	6.30156	-11.3143	3.08735e-13	6.60732e-12	20.0641
ENSG00000172183	EWSR1	-0.60796	8.3064	-11.3088	3.12944e-13	6.68691e-12	19.7627
ENSG00000183579	MAPK8IP3	-1.61026	5.35843	-11.3038	3.16804e-13	6.75881e-12	20.1229
ENSG00000203705	PCSK9	1.74715	3.78867	11.2875	3.29692e-13	7.0228e-12	20.0604
ENSG00000174125	HNRNPU	-0.48213	9.74918	-11.2861	3.30845e-13	7.03639e-12	19.5095
ENSG00000054690	PSME1	0.628477	7.46251	11.2827	3.33605e-13	7.08404e-12	19.7413
ENSG00000090238	RPL28	0.591617	9.53914	11.2816	3.34449e-13	7.09095e-12	19.4821
ENSG00000184792	SACS	-1.00059	6.60631	-11.2794	3.36276e-13	7.09662e-12	19.9416
ENSG00000140519	ERGIC3	0.554423	8.01372	11.2798	3.35919e-13	7.09662e-12	19.662
ENSG00000177943	TSPAN3	0.480966	8.92349	11.2801	3.35667e-13	7.09662e-12	19.5486
ENSG00000172159	GNL3	-0.751517	7.20074	-11.2696	3.44471e-13	7.25835e-12	19.8134
ENSG00000184675	ARL6IP1	0.517043	9.43119	11.267	3.46667e-13	7.29336e-12	19.4479
ENSG00000164877	PPP1R14B	0.768002	6.45277	11.2608	3.51926e-13	7.38125e-12	19.7949
ENSG00000110171	CTTN	-0.699465	8.48485	-11.2609	3.51837e-13	7.38125e-12	19.6118
ENSG00000236144	DHX34	-1.37773	5.31066	-11.2484	3.62806e-13	7.59777e-12	19.992
ENSG00000104899	ATF3	2.79683	2.85752	11.2449	3.66002e-13	7.65297e-12	18.9872
ENSG00000139182	RTRAF	0.627081	7.94067	11.2386	3.71657e-13	7.75933e-12	19.5754
ENSG00000161277	SERINC5	0.999704	5.20728	11.231	3.78658e-13	7.89342e-12	19.904
ENSG00000135596	GPRC5A	-0.618007	8.44661	-11.2177	3.91208e-13	8.1426e-12	19.5106
ENSG00000153933	RPS15	0.714209	8.19437	11.214	3.94826e-13	8.2054e-12	19.4676
ENSG00000160298	CDC42EP3	-0.962625	6.55799	-11.2046	4.04061e-13	8.38458e-12	19.7621
ENSG00000223891	RPL5	0.546772	9.54175	11.1901	4.18693e-13	8.67502e-12	19.2637
ENSG00000119950	H3F3A	0.811709	6.82143	11.1813	4.27928e-13	8.85292e-12	19.5627
ENSG00000158321	GOLGA8B	-2.40815	4.71512	-11.1786	4.30779e-13	8.89841e-12	19.5882
ENSG00000106829	PRPF4B	-0.844502	7.05938	-11.1623	4.48341e-13	9.2472e-12	19.5753
ENSG00000110455	DKC1	-0.630153	8.19173	-11.1607	4.50134e-13	9.27019e-12	19.394
ENSG00000053254	TXNDC17	0.655184	7.40325	11.1599	4.5106e-13	9.27525e-12	19.4415
ENSG00000090339	NSUN2	-0.758155	7.56226	-11.1526	4.59284e-13	9.43017e-12	19.4768
ENSG00000231767	PSMB7	0.588065	8.08508	11.1448	4.68095e-13	9.59666e-12	19.3332
ENSG00000198089	PDE4D	-0.724729	7.48842	-11.1378	4.7628e-13	9.74981e-12	19.4493
ENSG00000137699	ATP5PB	0.599803	7.46964	11.1228	4.94206e-13	1.01016e-11	19.3475
ENSG00000275180	ITPA	0.747102	6.76146	11.1197	4.98093e-13	1.01659e-11	19.4225
ENSG00000087076	NA	1.15339	4.96848	11.1131	5.06291e-13	1.02871e-11	19.6468
ENSG00000133321	ATP6V1C1	0.704051	6.86812	11.1135	5.05809e-13	1.02871e-11	19.4225
ENSG00000130827	TNFRSF9	2.53535	2.76968	11.1142	5.04883e-13	1.02871e-11	19.1477
ENSG00000233006	ZC3H13	-1.18606	6.18878	-11.1124	5.07089e-13	1.02879e-11	19.607
ENSG00000171227	BCL6	2.13254	3.06403	11.1078	5.12904e-13	1.03905e-11	19.4127
ENSG00000080031	UCHL1	0.461311	9.97982	11.1069	5.14128e-13	1.03999e-11	19.0061
ENSG00000142102	PEAR1	-2.29011	3.99138	-11.1017	5.20778e-13	1.05188e-11	19.1645
ENSG00000118503	CPSF7	-0.884798	6.69916	-11.0972	5.26491e-13	1.06028e-11	19.4777
ENSG00000105289	PCBD1	0.63136	7.81744	11.0973	5.26466e-13	1.06028e-11	19.2376
ENSG00000187961	AFAP1	-0.972853	6.59544	-11.0874	5.39508e-13	1.0849e-11	19.4617
ENSG00000258282	NA	0.856906	6.30757	11.0863	5.40989e-13	1.08627e-11	19.4188
ENSG00000256663	URB2	-1.17153	5.81739	-11.0822	5.46408e-13	1.09554e-11	19.5534
ENSG00000081181	PFDN5	0.596976	8.05641	11.081	5.48073e-13	1.09727e-11	19.1634
ENSG00000162614	SLC35C2	0.914821	6.08743	11.0777	5.52587e-13	1.10469e-11	19.4292
ENSG00000178409	ALDH3A1	0.552994	11.0786	11.0762	5.54628e-13	1.10715e-11	18.7816
ENSG00000127220	RPL24	0.627509	8.94579	11.0751	5.56187e-13	1.10864e-11	19.0416
ENSG00000176532	USP36	-0.955162	6.37736	-11.0609	5.76011e-13	1.14481e-11	19.439
ENSG00000107719	BOD1L1	-0.953537	6.65243	-11.061	5.7589e-13	1.14481e-11	19.399
ENSG00000070182	SAFB	-0.794947	6.58472	-11.0598	5.77579e-13	1.14626e-11	19.3801
ENSG00000118495	YPEL2	2.3386	2.73165	11.0528	5.87684e-13	1.16462e-11	19.1173
ENSG00000108840	CENPE	-1.10648	6.4019	-11.0433	6.01697e-13	1.19066e-11	19.3735
ENSG00000164403	TCERG1	-0.745539	7.18916	-11.0408	6.05502e-13	1.19646e-11	19.2594
ENSG00000112365	TRAPPC1	0.694969	6.70697	11.0388	6.08478e-13	1.2006e-11	19.2211
ENSG00000199753	HPGD	0.559776	8.05057	11.0377	6.10061e-13	1.20199e-11	19.0317
ENSG00000159184	KAT2A	-1.10009	6.50254	-11.0364	6.12081e-13	1.20423e-11	19.3569
ENSG00000165507	COPRS	0.718372	6.87026	11.0337	6.16221e-13	1.21063e-11	19.199
ENSG00000173898	RRAGC	1.42954	4.33339	11.0001	6.69833e-13	1.31407e-11	19.3884
ENSG00000143473	RPL35A	0.724669	8.41358	10.9948	6.78714e-13	1.32958e-11	18.9046
ENSG00000107872	TSR1	-0.699736	7.45101	-10.9939	6.8019e-13	1.33056e-11	19.0911
ENSG00000104881	PSMB1	0.64066	7.69674	10.9891	6.88454e-13	1.3448e-11	18.9873
ENSG00000278828	RPL23	0.684819	9.90553	10.9856	6.94349e-13	1.35438e-11	18.7045
ENSG00000105516	ATP5F1E	0.762807	8.3673	10.9772	7.09062e-13	1.3811e-11	18.8618
ENSG00000284976	HMGCL	1.29191	4.26302	10.9717	7.18774e-13	1.39803e-11	19.3188
ENSG00000012504	MRPL37	0.655828	6.85069	10.9666	7.28032e-13	1.41402e-11	19.0425
ENSG00000120458	PEG10	-0.694306	6.91748	-10.9615	7.37412e-13	1.4302e-11	19.0419
ENSG00000280385	NKTR	-1.16265	6.17248	-10.937	7.83726e-13	1.51787e-11	19.1729
ENSG00000214021	ROMO1	0.81885	6.02293	10.929	7.99543e-13	1.54631e-11	19.0539
ENSG00000099251	CHMP2A	0.771547	6.90883	10.9284	8.00752e-13	1.54646e-11	18.9223
ENSG00000127616	FTH1	0.826883	8.29974	10.9215	8.14682e-13	1.57114e-11	18.7063
ENSG00000105427	RPL18A	0.753514	6.54873	10.9181	8.21491e-13	1.57981e-11	18.9593
ENSG00000185730	FLNA	-0.749182	11.2694	-10.9181	8.21492e-13	1.57981e-11	18.4032
ENSG00000130751	SEM1	0.76707	7.41864	10.9101	8.38214e-13	1.6097e-11	18.8276
ENSG00000270069	COX7A2	0.878007	7.23096	10.9031	8.52952e-13	1.63341e-11	18.8229
ENSG00000251322	RAC1	0.481558	8.85403	10.9032	8.52795e-13	1.63341e-11	18.6224
ENSG00000141314	RTN3	0.568584	8.10398	10.8983	8.63261e-13	1.65084e-11	18.7072
ENSG00000172594	GOLGA3	-1.20034	6.32491	-10.894	8.72512e-13	1.66619e-11	19.0421
ENSG00000206530	PNPLA8	1.18725	5.37663	10.8906	8.79866e-13	1.67789e-11	19.0615
ENSG00000163638	GPATCH8	-0.990936	6.21052	-10.8876	8.86571e-13	1.68832e-11	19.0472
ENSG00000166046	CYBA	0.817335	7.41505	10.8802	9.03034e-13	1.71727e-11	18.7204
ENSG00000143578	TXLNA	-0.894218	6.6928	-10.8705	9.25426e-13	1.75741e-11	18.91
ENSG00000003147	UBAC2	0.741667	6.6332	10.8639	9.40615e-13	1.78377e-11	18.812
ENSG00000277534	ATP5MC3	0.644383	7.78597	10.862	9.45165e-13	1.78991e-11	18.6369
ENSG00000056277	NA	0.81329	6.99574	10.8586	9.53398e-13	1.803e-11	18.7396
ENSG00000139174	KPNA2	0.4236	9.96327	10.8562	9.59061e-13	1.81121e-11	18.3367
ENSG00000240509	RAB40B	1.64386	3.57627	10.8528	9.67301e-13	1.81928e-11	18.9871
ENSG00000235501	AKAP12	-0.741394	7.28323	-10.8535	9.65477e-13	1.81928e-11	18.7753
ENSG00000186132	TOMM40	-0.761396	7.35794	-10.8528	9.67334e-13	1.81928e-11	18.7453
ENSG00000180758	OST4	0.793963	6.76182	10.8486	9.77368e-13	1.83562e-11	18.7498
ENSG00000121858	NDRG4	1.47155	4.34864	10.8451	9.86114e-13	1.8495e-11	19.0079
ENSG00000139880	TMEM230	0.61411	7.3014	10.8424	9.92813e-13	1.85952e-11	18.6534
ENSG00000267530	PNISR	-1.19324	6.54124	-10.8412	9.95856e-13	1.86266e-11	18.8826
ENSG00000227218	CLSPN	-1.21377	5.52184	-10.8396	9.99756e-13	1.8674e-11	18.9836
ENSG00000110427	PLAUR	0.895386	5.87396	10.8349	1.01151e-12	1.88677e-11	18.8464
ENSG00000235194	RASGEF1A	1.85844	3.32232	10.8317	1.01976e-12	1.89956e-11	18.8816
ENSG00000184227	MAGED2	0.615728	7.20204	10.8241	1.03937e-12	1.93346e-11	18.6226
ENSG00000154309	RUSC2	-1.32452	5.566	-10.8214	1.04644e-12	1.94395e-11	18.9414
ENSG00000169891	POMP	0.726463	7.49598	10.8197	1.05087e-12	1.94954e-11	18.5962
ENSG00000168389	RAB5B	0.698722	6.62408	10.8171	1.05784e-12	1.9598e-11	18.6856
ENSG00000172375	THOC2	-0.787665	7.06143	-10.8053	1.08962e-12	2.01595e-11	18.6875
ENSG00000187678	TMEM184A	-1.56729	4.63067	-10.804	1.09309e-12	2.01962e-11	18.8747
ENSG00000215012	DICER1	-0.957578	6.25737	-10.7996	1.10533e-12	2.03948e-11	18.799
ENSG00000164362	TUB	-1.6107	4.65079	-10.7822	1.15458e-12	2.12749e-11	18.8132
ENSG00000163637	RBCK1	0.806656	7.03299	10.781	1.15817e-12	2.13123e-11	18.5557
ENSG00000279821	TPPP	1.74563	3.22062	10.7798	1.16168e-12	2.1348e-11	18.7338
ENSG00000142623	MORF4L2	0.521743	9.12668	10.7788	1.16448e-12	2.13707e-11	18.2727
ENSG00000073282	PSMD8	0.482512	9.0656	10.7742	1.17817e-12	2.1593e-11	18.2728
ENSG00000073605	UGDH	0.446161	8.84331	10.7678	1.19725e-12	2.19132e-11	18.251
ENSG00000258441	ACTN1	-0.59108	8.50389	-10.7672	1.19902e-12	2.19163e-11	18.3524
ENSG00000185453	LTBP2	-1.33293	5.27577	-10.765	1.20567e-12	2.20083e-11	18.8078
ENSG00000196123	SAE1	0.522348	8.71404	10.7627	1.2127e-12	2.20776e-11	18.2764
ENSG00000167524	AHNAK	-0.73568	9.63891	-10.7632	1.21112e-12	2.20776e-11	18.1988
ENSG00000160182	ETFB	0.891676	5.48865	10.7568	1.23087e-12	2.23787e-11	18.684
ENSG00000115267	NEDD8	0.816656	6.94152	10.7557	1.23426e-12	2.24104e-11	18.4859
ENSG00000180626	CYB5D2	1.22578	4.5135	10.7453	1.26686e-12	2.29692e-11	18.7476
ENSG00000254531	RRS1	-0.93075	6.22463	-10.7448	1.2684e-12	2.29692e-11	18.6333
ENSG00000234975	MIR503HG	-3.06888	3.44225	-10.7425	1.27603e-12	2.30768e-11	17.4275
ENSG00000169914	STN1	1.13782	4.83434	10.7382	1.28982e-12	2.32953e-11	18.7072
ENSG00000152117	ANKLE2	-0.720245	7.4908	-10.7275	1.32499e-12	2.38988e-11	18.431
ENSG00000167550	SNHG15	-1.22777	5.54767	-10.7227	1.34129e-12	2.41609e-11	18.6922
ENSG00000140379	KRT7-AS	-2.97269	3.70347	-10.721	1.34675e-12	2.42274e-11	17.5451
ENSG00000198934	SQOR	0.947296	5.6011	10.7144	1.36944e-12	2.46031e-11	18.5785
ENSG00000198466	POF1B	1.08135	4.97984	10.7113	1.38016e-12	2.47306e-11	18.63
ENSG00000147799	TMEM219	0.793721	6.05859	10.7116	1.37906e-12	2.47306e-11	18.502
ENSG00000104081	ATP1B3	0.52797	8.06902	10.7061	1.39836e-12	2.50239e-11	18.2069
ENSG00000197381	COL4A1	-0.822692	6.91597	-10.7054	1.40105e-12	2.50391e-11	18.457
ENSG00000176343	KRT15	1.77602	3.2857	10.6977	1.42832e-12	2.54932e-11	18.5824
ENSG00000251169	NA	2.11933	2.63547	10.6802	1.49314e-12	2.65807e-11	18.3969
ENSG00000185745	POLR2G	0.636049	6.98511	10.6805	1.49168e-12	2.65807e-11	18.2901
ENSG00000185684	SRRM1	-0.885565	6.16916	-10.6756	1.51038e-12	2.68524e-11	18.496
ENSG00000100100	ZNF331	-1.49718	5.04901	-10.6717	1.52524e-12	2.70814e-11	18.5682
ENSG00000132793	TENT4A	-0.969593	5.85742	-10.6648	1.55208e-12	2.75221e-11	18.4986
ENSG00000100739	NDUFAB1	0.658426	6.90684	10.6635	1.55721e-12	2.75773e-11	18.2707
ENSG00000198744	BBC3	1.70717	3.67956	10.6548	1.59197e-12	2.81564e-11	18.4984
ENSG00000166813	OSBPL9	0.723424	6.63686	10.6523	1.60197e-12	2.82967e-11	18.2824
ENSG00000117472	BIRC6	-0.856783	7.12665	-10.6499	1.6118e-12	2.84335e-11	18.2954
ENSG00000180787	TPR	-0.697387	8.12795	-10.6448	1.63286e-12	2.87678e-11	18.1211
ENSG00000166436	DENND4B	-1.20966	5.43718	-10.6398	1.6534e-12	2.90921e-11	18.4903
ENSG00000242294	DYNLL2	-0.815733	7.11178	-10.6366	1.66696e-12	2.9293e-11	18.26
ENSG00000213070	EI24	0.563394	7.57505	10.6267	1.70921e-12	2.99969e-11	18.0649
ENSG00000185986	CUEDC1	-0.811231	6.56907	-10.624	1.72094e-12	3.01639e-11	18.275
ENSG00000239830	SPEN	-1.08503	6.111	-10.6181	1.74683e-12	3.05785e-11	18.3744
ENSG00000062282	SPG7	-0.769928	6.8362	-10.6113	1.77737e-12	3.10732e-11	18.212
ENSG00000139631	RPN2	0.478626	8.95661	10.6084	1.79057e-12	3.1264e-11	17.854
ENSG00000196793	E2F1	-1.13531	5.5644	-10.6067	1.79807e-12	3.13548e-11	18.3936
ENSG00000119772	CLCF1	-1.152	5.42349	-10.6036	1.81257e-12	3.15673e-11	18.3907
ENSG00000238105	XPO6	-0.749814	7.13694	-10.5952	1.85151e-12	3.21636e-11	18.1355
ENSG00000278864	CSGALNACT1	0.656577	6.95937	10.5955	1.84977e-12	3.21636e-11	18.0514
ENSG00000108932	FDPS	0.812822	6.2896	10.5894	1.87907e-12	3.26007e-11	18.1597
ENSG00000167994	ZC3H18	-0.962059	5.99829	-10.5844	1.90292e-12	3.29457e-11	18.2779
ENSG00000228315	PRXL2A	0.659399	6.63578	10.5842	1.90378e-12	3.29457e-11	18.0914
ENSG00000232188	RNF181	0.929736	6.05241	10.5807	1.92068e-12	3.31124e-11	18.189
ENSG00000166589	RPL29	0.678855	7.98964	10.5812	1.91826e-12	3.31124e-11	17.8938
ENSG00000260404	RPL14	0.532351	8.27075	10.5811	1.91889e-12	3.31124e-11	17.8674
ENSG00000052850	LFNG	1.26082	3.9515	10.5753	1.94746e-12	3.35316e-11	18.3361
ENSG00000160345	ANXA10	1.38553	4.2936	10.5734	1.9567e-12	3.36483e-11	18.3336
ENSG00000170175	KMT2B	-1.07656	6.18139	-10.5691	1.97845e-12	3.39796e-11	18.2226
ENSG00000204172	STX3	0.905485	5.61479	10.5669	1.98911e-12	3.41198e-11	18.2027
ENSG00000170160	CCN2	-2.78085	3.71703	-10.5616	2.01637e-12	3.45439e-11	17.4407
ENSG00000182950	HSPA12A	-0.907681	6.35667	-10.5507	2.07284e-12	3.54669e-11	18.1546
ENSG00000198125	GLMP	1.10284	4.91617	10.5424	2.11694e-12	3.61761e-11	18.2132
ENSG00000105499	MYL12B	0.520634	8.5133	10.5235	2.22168e-12	3.79185e-11	17.6916
ENSG00000256073	AKR1B10	0.383927	11.6723	10.52	2.24151e-12	3.82093e-11	17.2692
ENSG00000254166	NA	0.564658	7.57499	10.5192	2.24621e-12	3.82415e-11	17.7981
ENSG00000162078	NA	0.498932	8.2047	10.5185	2.24974e-12	3.82541e-11	17.7204
ENSG00000075826	COPS8	0.725117	6.61747	10.5097	2.30101e-12	3.9077e-11	17.9247
ENSG00000148143	DHX37	-1.00653	6.32354	-10.5076	2.31337e-12	3.92382e-11	18.0316
ENSG00000153363	MPP3	-1.75645	4.46214	-10.5026	2.34311e-12	3.96933e-11	18.0433
ENSG00000173614	ELF1	0.797204	5.82014	10.5009	2.35342e-12	3.98187e-11	18.007
ENSG00000111788	HNRNPH2	0.670059	6.60374	10.4977	2.37261e-12	4.00936e-11	17.8748
ENSG00000287263	ZMYND19	-1.39979	4.91326	-10.4893	2.42392e-12	4.09101e-11	18.12
ENSG00000008735	DCBLD2	-0.376101	10.3765	-10.4832	2.46209e-12	4.15029e-11	17.3785
ENSG00000164125	TP53INP1	1.87555	3.33418	10.4722	2.53176e-12	4.25916e-11	17.9441
ENSG00000245522	PIEZO1	-1.05058	6.69722	-10.4721	2.53291e-12	4.25916e-11	17.9067
ENSG00000151117	PFKP	-0.551359	8.72575	-10.4714	2.53712e-12	4.26099e-11	17.5657
ENSG00000112183	NACA	0.52269	9.12742	10.47	2.54605e-12	4.27073e-11	17.4801
ENSG00000279789	ABHD4	0.735678	6.69071	10.4694	2.54994e-12	4.27201e-11	17.8315
ENSG00000255874	MYH10	-0.824304	6.46746	-10.4556	2.6416e-12	4.42014e-11	17.8587
ENSG00000285517	ARHGEF17	-1.70124	4.55837	-10.4537	2.6543e-12	4.43597e-11	17.9908
ENSG00000225462	OAZ1	0.53678	8.50955	10.4523	2.66375e-12	4.44631e-11	17.5111
ENSG00000164342	MRPS15	0.734338	6.23329	10.4435	2.72486e-12	4.54277e-11	17.812
ENSG00000223797	DYNC1H1	-0.684166	9.36509	-10.4354	2.78129e-12	4.63119e-11	17.4336
ENSG00000162692	MTHFD2	-0.697725	7.42899	-10.4199	2.89409e-12	4.81315e-11	17.6973
ENSG00000112299	SLTM	-0.667376	7.89093	-10.3981	3.06047e-12	5.08366e-11	17.5115
ENSG00000139800	DHRS7	0.798948	6.33376	10.3951	3.08385e-12	5.11627e-11	17.6637
ENSG00000267121	LTA4H	0.604213	7.57193	10.3903	3.12185e-12	5.17303e-11	17.4587
ENSG00000089250	TTC39A	1.83703	3.25031	10.3874	3.14575e-12	5.20631e-11	17.6791
ENSG00000151743	PHYH	0.807506	5.97381	10.3852	3.16302e-12	5.22224e-11	17.7029
ENSG00000177283	MAVS	-0.626105	7.42528	-10.3857	3.15935e-12	5.22224e-11	17.5247
ENSG00000179348	RSL1D1	-0.629193	8.15134	-10.3847	3.16701e-12	5.22251e-11	17.4336
ENSG00000116668	GAS5	-0.660513	7.47431	-10.3809	3.19855e-12	5.26816e-11	17.5508
ENSG00000196705	CCAR1	-0.665069	7.67354	-10.3795	3.20963e-12	5.28004e-11	17.4843
ENSG00000251369	EIF3H	0.634253	8.28942	10.3751	3.24668e-12	5.33455e-11	17.3389
ENSG00000159899	SLC4A7	-0.921573	6.40306	-10.3725	3.26798e-12	5.36311e-11	17.6909
ENSG00000221990	RNF213	-0.743415	8.38057	-10.3664	3.31933e-12	5.44083e-11	17.3422
ENSG00000111664	TM7SF3	0.552842	7.35211	10.3641	3.33958e-12	5.46746e-11	17.43
ENSG00000198443	LONRF2	-1.64594	4.82085	-10.3622	3.35585e-12	5.48752e-11	17.7809
ENSG00000163121	SGSM2	-1.14834	5.47323	-10.3607	3.3687e-12	5.50193e-11	17.7708
ENSG00000127423	DPM2	0.922951	5.8438	10.3588	3.38486e-12	5.52173e-11	17.6243
ENSG00000121454	KRI1	-1.41301	4.79649	-10.3555	3.41421e-12	5.56296e-11	17.7833
ENSG00000105997	PIR	0.810604	6.14163	10.3495	3.46663e-12	5.64164e-11	17.5715
ENSG00000159433	TBCB	0.575735	7.97031	10.3485	3.47538e-12	5.64914e-11	17.2957
ENSG00000230590	ZNF692	-1.65162	4.25194	-10.3443	3.51305e-12	5.70359e-11	17.6701
ENSG00000225791	ADGRG6	-0.704967	7.72024	-10.3353	3.59548e-12	5.82605e-11	17.3604
ENSG00000259802	TXNRD1	0.335812	11.0982	10.3352	3.59701e-12	5.82605e-11	16.8836
ENSG00000196787	ASXL1	-0.760543	6.68048	-10.3324	3.62243e-12	5.86027e-11	17.5199
ENSG00000180229	BRD9	-1.22798	5.50624	-10.3313	3.63286e-12	5.87018e-11	17.7036
ENSG00000175874	HEXB	0.606961	7.47098	10.3289	3.65527e-12	5.89942e-11	17.324
ENSG00000221821	NA	0.866606	8.05364	10.3283	3.66066e-12	5.90114e-11	17.2309
ENSG00000141540	SLC7A1	-0.919778	6.71626	-10.3263	3.67945e-12	5.92443e-11	17.5674
ENSG00000223705	PHLDB2	-0.748693	6.65574	-10.3194	3.74578e-12	6.02413e-11	17.4871
ENSG00000119042	ANXA7	0.547375	7.86268	10.3135	3.80316e-12	6.10922e-11	17.2478
ENSG00000161960	CYBRD1	0.796395	6.24382	10.3115	3.82245e-12	6.13299e-11	17.4613
ENSG00000175305	CTDSP2	0.710834	6.13444	10.3059	3.8777e-12	6.21433e-11	17.4461
ENSG00000006283	TM4SF1	-0.452092	9.51027	-10.2916	4.02371e-12	6.44077e-11	16.987
ENSG00000282936	CACNG6	1.29044	3.93949	10.2885	4.05624e-12	6.48523e-11	17.6174
ENSG00000172575	ARF5	0.712126	6.23009	10.2853	4.08957e-12	6.53088e-11	17.3864
ENSG00000172197	CPSF1	-0.862047	6.39389	-10.28	4.14545e-12	6.61239e-11	17.4272
ENSG00000164741	ORC6	-0.980042	5.81042	-10.2787	4.15984e-12	6.62759e-11	17.5473
ENSG00000170049	INPPL1	-0.944887	6.50659	-10.2773	4.17482e-12	6.64371e-11	17.4109
ENSG00000213918	HEXIM1	-0.692687	7.23866	-10.2761	4.18822e-12	6.65728e-11	17.2549
ENSG00000183889	BABAM2	0.725493	6.20036	10.2729	4.22284e-12	6.7045e-11	17.3542
ENSG00000244128	MIR1915HG	-2.02847	4.056	-10.2723	4.22875e-12	6.70608e-11	17.5099
ENSG00000228649	SERINC1	0.608464	7.32408	10.2692	4.26259e-12	6.75191e-11	17.2114
ENSG00000111348	CHD1	-0.898436	6.42323	-10.2655	4.30349e-12	6.80879e-11	17.4182
ENSG00000267541	NA	0.617265	7.59443	10.2647	4.31257e-12	6.81526e-11	17.1194
ENSG00000072195	PAIP2	0.882308	5.97196	10.2635	4.32559e-12	6.82793e-11	17.3888
ENSG00000262902	NDUFS6	0.718659	6.4078	10.2604	4.36029e-12	6.87476e-11	17.298
ENSG00000196668	ZFC3H1	-1.01233	5.95703	-10.2502	4.47742e-12	7.05117e-11	17.4365
ENSG00000196689	NA	0.956812	5.38348	10.2497	4.48251e-12	7.05117e-11	17.4209
ENSG00000127415	ASNA1	0.754819	6.38238	10.2441	4.54869e-12	7.14705e-11	17.246
ENSG00000145040	SFN	0.675665	6.89579	10.2404	4.59171e-12	7.20634e-11	17.1546
ENSG00000232931	COL27A1	-1.44855	5.54261	-10.2395	4.60225e-12	7.21459e-11	17.4816
ENSG00000250397	LAMTOR4	0.751568	6.00757	10.2273	4.75016e-12	7.43792e-11	17.2481
ENSG00000268043	ITPRID2	-0.621609	7.63394	-10.2262	4.76329e-12	7.44993e-11	17.0818
ENSG00000154358	MMAB	1.00691	5.03074	10.2246	4.78376e-12	7.47339e-11	17.3862
ENSG00000260852	PIP5K1A	-0.834869	6.42692	-10.2237	4.79469e-12	7.48191e-11	17.2956
ENSG00000114859	PILRB	-2.58949	3.76734	-10.212	4.94205e-12	7.70306e-11	16.7392
ENSG00000246898	PBX1	-0.729895	6.36948	-10.2103	4.96408e-12	7.72858e-11	17.2242
ENSG00000079385	MYADM	0.550332	7.28104	10.2055	5.02541e-12	7.81515e-11	17.0004
ENSG00000255031	NCK1	1.08022	4.90987	10.2029	5.05936e-12	7.85899e-11	17.3547
ENSG00000213906	LAPTM4B	0.507606	7.96636	10.2018	5.07335e-12	7.87177e-11	16.9228
ENSG00000157368	MAPK3	1.01218	5.12317	10.1972	5.13477e-12	7.95802e-11	17.3134
ENSG00000227473	H2AFJ	0.792727	6.08323	10.1948	5.16654e-12	7.99817e-11	17.137
ENSG00000170561	TOMM7	0.811187	7.09921	10.1924	5.19906e-12	8.03941e-11	17.0145
ENSG00000274180	ILF3	-0.571951	8.27194	-10.1912	5.21526e-12	8.05534e-11	16.9019
ENSG00000155792	NA	0.83404	5.94941	10.1792	5.37962e-12	8.2998e-11	17.1464
ENSG00000107796	POLR2L	0.584549	8.07122	10.1732	5.46362e-12	8.4199e-11	16.8024
ENSG00000257285	IGFBP6	0.809916	6.08026	10.1628	5.61286e-12	8.64014e-11	17.0902
ENSG00000269929	NFIL3	1.40934	4.10527	10.1581	5.68236e-12	8.73727e-11	17.2843
ENSG00000253210	NFAT5	-1.16856	5.48688	-10.1424	5.91862e-12	9.08009e-11	17.2217
ENSG00000204186	SNRPB	0.546617	9.0891	10.1426	5.91521e-12	9.08009e-11	16.6147
ENSG00000228328	SNRNP70	-0.677369	8.05078	-10.1378	5.98898e-12	9.17772e-11	16.7954
ENSG00000198064	DST	-0.787503	7.67059	-10.1329	6.0667e-12	9.28641e-11	16.8567
ENSG00000136002	ARFGAP1	-0.979255	6.35641	-10.1315	6.08891e-12	9.30996e-11	17.0694
ENSG00000117461	TMEM205	0.870375	5.49188	10.1242	6.205e-12	9.47685e-11	17.0645
ENSG00000224420	NAA40	-0.894077	5.67923	-10.1201	6.27062e-12	9.56637e-11	17.1127
ENSG00000104368	PRCP	0.614384	6.87361	10.1174	6.31512e-12	9.6235e-11	16.8599
ENSG00000261652	RETSAT	0.662351	6.58645	10.1166	6.32866e-12	9.63338e-11	16.9034
ENSG00000254837	NA	0.755261	7.25134	10.1157	6.34391e-12	9.64586e-11	16.7982
ENSG00000280383	FADS2	0.458319	8.82393	10.1108	6.42434e-12	9.75727e-11	16.5559
ENSG00000119547	GPX4	0.736141	6.90965	10.1068	6.49272e-12	9.85017e-11	16.8011
ENSG00000117525	RPN1	0.471704	8.36294	10.1054	6.51626e-12	9.87492e-11	16.6181
ENSG00000241343	NHS	-1.68465	4.70592	-10.1027	6.56211e-12	9.93338e-11	17.1113
ENSG00000180071	GUK1	0.822082	6.55239	10.0975	6.6504e-12	1.00559e-10	16.8339
ENSG00000155816	CDA	1.31893	4.09077	10.0881	6.8158e-12	1.02946e-10	17.1069
ENSG00000099725	MAP1LC3B	0.715648	6.44179	10.0854	6.86442e-12	1.03566e-10	16.8796
ENSG00000250067	CAPN15	-1.17862	5.39414	-10.0826	6.91423e-12	1.04202e-10	17.0661
ENSG00000171790	NAA38	0.731684	6.36425	10.0814	6.93522e-12	1.04403e-10	16.8267
ENSG00000231131	NECAP2	0.809915	5.78626	10.0801	6.95991e-12	1.04659e-10	16.9306
ENSG00000260853	ENGASE	-1.87839	5.06855	-10.0672	7.19658e-12	1.08099e-10	17.0343
ENSG00000286067	NFATC2IP	-1.00662	5.87454	-10.0601	7.33135e-12	1.10002e-10	16.953
ENSG00000189212	PPP1CA	0.521554	7.86659	10.0594	7.34529e-12	1.10091e-10	16.5404
ENSG00000251474	ADIPOR1	0.603568	7.08467	10.0529	7.47055e-12	1.11845e-10	16.6594
ENSG00000066735	TOB1	0.710756	6.26733	10.0494	7.5387e-12	1.12742e-10	16.7498
ENSG00000230551	SLC26A2	-0.840506	6.16323	-10.0438	7.65039e-12	1.14287e-10	16.8235
ENSG00000065361	NPLOC4	-0.647957	7.92428	-10.0393	7.73977e-12	1.15496e-10	16.5852
ENSG00000253616	UPF1	-0.839442	6.47307	-10.0377	7.77328e-12	1.15869e-10	16.7966
ENSG00000261713	TMED10	0.489472	8.16376	10.0341	7.84586e-12	1.16824e-10	16.4603
ENSG00000185467	KRT7	-0.462714	10.8287	-10.0323	7.88389e-12	1.17262e-10	16.1481
ENSG00000243302	NUP153	-0.781159	7.04141	-10.0274	7.98448e-12	1.18629e-10	16.681
ENSG00000279759	NDUFB4	0.783597	6.93993	10.0212	8.11535e-12	1.20442e-10	16.594
ENSG00000102174	LAMTOR1	0.661225	6.82123	10.0167	8.21107e-12	1.21731e-10	16.5823
ENSG00000255014	RRAGA	0.648562	6.73511	10.0137	8.27486e-12	1.22543e-10	16.5792
ENSG00000269858	NAA15	-0.732732	7.23518	-10.0122	8.30848e-12	1.22908e-10	16.6046
ENSG00000265018	TESC	0.806922	6.15107	10.009	8.37726e-12	1.23791e-10	16.6588
ENSG00000139946	PPP1R12C	-0.872412	6.49975	-10.0046	8.47527e-12	1.25104e-10	16.7043
ENSG00000179841	IFI16	1.69249	3.46113	10.0012	8.55083e-12	1.26083e-10	16.8263
ENSG00000026036	TMEM60	1.14589	4.67283	10	8.5769e-12	1.26331e-10	16.8321
ENSG00000203896	UPF2	-0.792606	6.41086	-9.99302	8.73498e-12	1.28521e-10	16.6799
ENSG00000243970	TCHP	-1.04762	5.41523	-9.98845	8.84001e-12	1.29926e-10	16.8294
ENSG00000126778	TMEM258	0.799742	6.38083	9.98681	8.87796e-12	1.30344e-10	16.5803
ENSG00000101670	TBC1D7	1.17993	4.49374	9.98594	8.89838e-12	1.30503e-10	16.8309
ENSG00000246273	ISCU	0.66742	6.77046	9.98548	8.90894e-12	1.30518e-10	16.5364
ENSG00000132522	CCP110	-1.07618	5.41972	-9.98041	9.02793e-12	1.32119e-10	16.8012
ENSG00000248383	MTA1	-0.962292	5.71229	-9.96983	9.28161e-12	1.35686e-10	16.7345
ENSG00000196569	PTTG1	0.603912	7.57428	9.9694	9.29201e-12	1.35693e-10	16.3377
ENSG00000246922	SUCLG1	0.667978	7.0245	9.96294	9.45058e-12	1.37861e-10	16.4337
ENSG00000232445	CD70	1.02803	4.81505	9.96116	9.49471e-12	1.3829e-10	16.7257
ENSG00000230074	TK1	0.550401	8.28911	9.96094	9.5002e-12	1.3829e-10	16.2296
ENSG00000130810	NDUFS5	0.75085	7.40104	9.95824	9.56768e-12	1.39124e-10	16.3483
ENSG00000117009	MRPL27	0.66119	6.71325	9.95333	9.69147e-12	1.40774e-10	16.4439
ENSG00000150627	NUFIP2	-0.62387	7.92941	-9.9488	9.80727e-12	1.42304e-10	16.337
ENSG00000184949	KLF3	0.760222	5.76507	9.94458	9.91629e-12	1.43734e-10	16.5705
ENSG00000272645	ZNF260	-1.17591	5.38293	-9.943	9.9576e-12	1.44179e-10	16.7145
ENSG00000175294	GOLGA2	-0.946169	6.01332	-9.94161	9.9939e-12	1.44552e-10	16.632
ENSG00000198838	TRAF1	1.2124	4.4704	9.93334	1.02129e-11	1.47563e-10	16.7037
ENSG00000273143	ARPC2	0.487944	8.47454	9.92336	1.0484e-11	1.5132e-10	16.1241
ENSG00000165312	LYAR	-1.20285	5.13614	-9.91572	1.06964e-11	1.54223e-10	16.6583
ENSG00000162004	PSMA7	0.531081	8.82052	9.91379	1.07507e-11	1.54842e-10	16.056
ENSG00000261556	HSD17B4	0.548291	7.19803	9.90699	1.09446e-11	1.57468e-10	16.262
ENSG00000223764	MYBL1	-1.07378	5.92763	-9.90007	1.11454e-11	1.60189e-10	16.5324
ENSG00000233594	BTAF1	-0.953871	6.66961	-9.89753	1.12199e-11	1.61089e-10	16.4308
ENSG00000273576	PXN	-0.798689	6.36316	-9.88855	1.14878e-11	1.64763e-10	16.3983
ENSG00000188766	DDX11	-1.05729	5.58054	-9.88502	1.1595e-11	1.66126e-10	16.5383
ENSG00000253982	ZCRB1	0.76492	6.23907	9.87865	1.17911e-11	1.68758e-10	16.3248
ENSG00000108375	ATG13	0.646635	6.45408	9.8717	1.20087e-11	1.71692e-10	16.2819
ENSG00000100068	VDAC3	0.533722	8.25065	9.86912	1.20903e-11	1.72679e-10	16.0012
ENSG00000207547	CFDP1	0.828639	5.57787	9.86546	1.22074e-11	1.74169e-10	16.4009
ENSG00000234460	SYNPO	-0.955356	5.92284	-9.86425	1.22463e-11	1.74542e-10	16.4056
ENSG00000157653	HSD17B11	0.740512	5.94	9.86274	1.2295e-11	1.75053e-10	16.3272
ENSG00000213199	RPS24	0.62774	10.0245	9.86063	1.23635e-11	1.75844e-10	15.7679
ENSG00000182685	TMEM14B	0.650762	6.79455	9.85977	1.23918e-11	1.76064e-10	16.1805
ENSG00000228451	RABAC1	0.965259	5.01883	9.85935	1.24053e-11	1.76072e-10	16.4283
ENSG00000179361	TMEM208	0.753937	6.08725	9.85754	1.24648e-11	1.7655e-10	16.2846
ENSG00000151611	RPL23A	0.797826	6.2572	9.85778	1.24568e-11	1.7655e-10	16.2616
ENSG00000111641	PSEN1	0.582259	7.19314	9.8568	1.2489e-11	1.7671e-10	16.1283
ENSG00000127324	GLOD4	0.591349	7.29421	9.85335	1.26028e-11	1.78135e-10	16.0837
ENSG00000273230	KDELR3	0.786501	5.58798	9.8469	1.28188e-11	1.81001e-10	16.3407
ENSG00000131797	EIF3I	0.497189	8.16413	9.8441	1.29138e-11	1.82154e-10	15.9501
ENSG00000225434	SKIL	-1.09021	5.55467	-9.84348	1.2935e-11	1.82264e-10	16.4408
ENSG00000264920	CCT7	0.420514	9.553	9.83901	1.30881e-11	1.84232e-10	15.7708
ENSG00000145416	SDHC	0.638988	6.67006	9.83812	1.31191e-11	1.84478e-10	16.1529
ENSG00000141933	STC1	1.5984	3.30841	9.83548	1.32105e-11	1.85572e-10	16.434
ENSG00000162755	MRPS21	0.645853	6.74237	9.83499	1.32276e-11	1.85621e-10	16.1287
ENSG00000169184	CD55	0.691565	6.52359	9.82564	1.35579e-11	1.90062e-10	16.1664
ENSG00000185245	SLC7A6	-1.3715	5.17556	-9.81282	1.40243e-11	1.96197e-10	16.398
ENSG00000134207	AP1S1	0.63101	6.66379	9.81308	1.40148e-11	1.96197e-10	16.0562
ENSG00000127129	RPL36AL	0.588438	7.94797	9.81232	1.40428e-11	1.96254e-10	15.8842
ENSG00000135976	EPB41L2	-0.571207	7.63657	-9.80845	1.4187e-11	1.98067e-10	15.9686
ENSG00000109063	ALG8	0.593183	6.96259	9.80651	1.42596e-11	1.98877e-10	16.0164
ENSG00000189410	TPP1	0.617602	6.97071	9.80287	1.43973e-11	2.00593e-10	16.0158
ENSG00000184481	RBM26	-0.898303	5.99193	-9.80234	1.44177e-11	2.00673e-10	16.2635
ENSG00000269028	RPL6	0.496097	8.7634	9.79803	1.45825e-11	2.0276e-10	15.749
ENSG00000182511	ESD	0.666119	6.93651	9.79606	1.46587e-11	2.03611e-10	15.996
ENSG00000232368	ALDH7A1	0.571688	6.94613	9.7929	1.47817e-11	2.05111e-10	15.9744
ENSG00000125744	SKP1	0.597946	8.20948	9.78801	1.49739e-11	2.07567e-10	15.8006
ENSG00000149596	HECTD4	-1.2972	5.53803	-9.78589	1.5058e-11	2.08521e-10	16.3054
ENSG00000266401	AMZ2	0.609387	7.1256	9.77944	1.53168e-11	2.1189e-10	15.9178
ENSG00000243716	NA	-2.39548	4.11253	-9.77443	1.55211e-11	2.14499e-10	15.9793
ENSG00000216775	S100A10	0.514115	9.67075	9.76838	1.57714e-11	2.17738e-10	15.5421
ENSG00000255248	NDUFA8	0.75533	6.26465	9.76606	1.58683e-11	2.18854e-10	16.019
ENSG00000178338	LRRK1	-1.09011	5.67318	-9.76528	1.59011e-11	2.19085e-10	16.2049
ENSG00000175564	NA	-1.89441	4.03174	-9.76209	1.60358e-11	2.20719e-10	16.0792
ENSG00000171121	TGOLN2	-0.516762	8.77288	-9.76164	1.60552e-11	2.20763e-10	15.6968
ENSG00000215417	NENF	0.716131	6.34801	9.75109	1.65098e-11	2.26786e-10	15.9683
ENSG00000185485	EPAS1	-0.710704	6.73967	-9.74804	1.66436e-11	2.28394e-10	15.9489
ENSG00000274925	ATP5MG	0.755169	6.12437	9.74504	1.67762e-11	2.29983e-10	15.9994
ENSG00000261326	FNBP4	-0.832527	6.44858	-9.74357	1.68419e-11	2.30651e-10	16.0344
ENSG00000263004	NA	0.789055	7.6952	9.74159	1.69304e-11	2.31631e-10	15.7465
ENSG00000189423	SFPQ	-0.432206	8.90193	-9.73988	1.70073e-11	2.32451e-10	15.6041
ENSG00000130684	EAPP	0.852216	5.93628	9.73947	1.70254e-11	2.32465e-10	16.0314
ENSG00000287104	CTSD	0.729048	7.2979	9.73883	1.70544e-11	2.32628e-10	15.7777
ENSG00000168490	ATP5MPL	0.679552	7.26963	9.73636	1.71665e-11	2.33923e-10	15.7834
ENSG00000121104	MGAT4B	0.582655	7.03429	9.72872	1.75173e-11	2.38466e-10	15.7772
ENSG00000235847	LMO4	-0.935145	5.86289	-9.72695	1.75996e-11	2.39284e-10	16.0522
ENSG00000021300	ETFA	0.455163	8.33568	9.72668	1.76125e-11	2.39284e-10	15.6199
ENSG00000273151	TCTN3	0.611564	6.8928	9.72437	1.77205e-11	2.40513e-10	15.794
ENSG00000214135	ACO1	0.592889	6.82382	9.72145	1.78583e-11	2.42142e-10	15.8118
ENSG00000230267	MICAL2	-0.711483	6.79188	-9.72065	1.78963e-11	2.42417e-10	15.8933
ENSG00000102053	NEAT1	-0.846844	7.99127	-9.7196	1.79461e-11	2.4285e-10	15.7279
ENSG00000161791	TRIML2	0.975728	5.32656	9.71578	1.81289e-11	2.45081e-10	16.0629
ENSG00000170458	SON	-0.552889	8.02602	-9.70864	1.84756e-11	2.49521e-10	15.6561
ENSG00000064932	PPIB	0.61779	6.84267	9.70295	1.87562e-11	2.53061e-10	15.7585
ENSG00000203761	C9orf16	1.04331	4.77983	9.69795	1.90068e-11	2.56188e-10	16.0394
ENSG00000274471	TRRAP	-0.862983	6.66755	-9.69491	1.91611e-11	2.58014e-10	15.8661
ENSG00000283959	ZNF512B	-1.3252	4.67531	-9.68927	1.945e-11	2.61388e-10	16.0804
ENSG00000076356	NCAPD3	-0.756595	6.49991	-9.68957	1.94348e-11	2.61388e-10	15.855
ENSG00000204767	MIF4GD	0.942407	5.18685	9.68531	1.96557e-11	2.63633e-10	15.9552
ENSG00000184937	WDR62	-0.840486	6.36059	-9.68535	1.96536e-11	2.63633e-10	15.8748
ENSG00000216624	FIS1	0.695478	6.26891	9.68365	1.97425e-11	2.64537e-10	15.7929
ENSG00000169330	OXA1L	0.575097	7.63099	9.67639	2.01271e-11	2.69427e-10	15.5665
ENSG00000111319	KMT2D	-1.11764	6.57225	-9.66537	2.07249e-11	2.77157e-10	15.8459
ENSG00000175311	NDST1	-0.911319	6.77672	-9.65771	2.11517e-11	2.82588e-10	15.7302
ENSG00000283341	SOX9	1.03026	4.52189	9.6541	2.13558e-11	2.85036e-10	15.9349
ENSG00000182993	UNG	-0.634268	6.86979	-9.65163	2.14966e-11	2.86635e-10	15.6603
ENSG00000242308	ZDHHC12	0.835569	5.75666	9.64036	2.21506e-11	2.9504e-10	15.7188
ENSG00000159763	MRPL11	0.652787	6.34193	9.64003	2.21701e-11	2.9504e-10	15.6676
ENSG00000246334	CEP85	-1.1074	5.29439	-9.63762	2.2313e-11	2.96652e-10	15.9269
ENSG00000247627	PKP4	-0.886358	6.30227	-9.63686	2.23584e-11	2.96966e-10	15.7473
ENSG00000237310	SRP14	0.57057	7.71756	9.6321	2.26434e-11	3.0046e-10	15.4513
ENSG00000103449	MCU	0.556495	7.06777	9.62029	2.33666e-11	3.09755e-10	15.4963
ENSG00000139194	NA	0.610982	6.80837	9.61893	2.34515e-11	3.10579e-10	15.5268
ENSG00000196208	EP400	-0.886912	6.24849	-9.61333	2.38044e-11	3.14947e-10	15.7229
ENSG00000183578	RBM47	0.669088	6.36898	9.60929	2.4062e-11	3.18047e-10	15.5642
ENSG00000167193	ICE1	-0.812358	6.95693	-9.60371	2.44227e-11	3.22485e-10	15.5742
ENSG00000260279	GTPBP4	-0.595136	7.55554	-9.60337	2.4445e-11	3.22485e-10	15.4617
ENSG00000167646	RNASEH1	-0.934392	5.99175	-9.59986	2.46749e-11	3.25204e-10	15.7175
ENSG00000259516	TRIM44	-0.629919	7.25422	-9.59659	2.4891e-11	3.27736e-10	15.4956
ENSG00000145358	PFAS	-0.809443	6.64101	-9.58472	2.56917e-11	3.37952e-10	15.5467
ENSG00000206503	SART3	-0.692897	6.61343	-9.58015	2.60072e-11	3.41773e-10	15.5486
ENSG00000189120	SSH1	-0.869566	6.25169	-9.57894	2.60912e-11	3.42213e-10	15.65
ENSG00000138109	GOLPH3L	0.820134	5.63407	9.57889	2.6095e-11	3.42213e-10	15.6236
ENSG00000132517	HERPUD1	0.749198	6.59718	9.57859	2.61159e-11	3.42213e-10	15.5265
ENSG00000197182	MRPL10	0.624322	6.65002	9.57782	2.61693e-11	3.42585e-10	15.4644
ENSG00000189337	NA	1.6713	3.01476	9.57739	2.61994e-11	3.4265e-10	15.7421
ENSG00000141668	XRCC2	-1.30605	4.86293	-9.5686	2.68214e-11	3.49995e-10	15.7652
ENSG00000171388	B3GNT3	1.22964	4.13435	9.56881	2.68064e-11	3.49995e-10	15.7505
ENSG00000166405	TSPAN6	0.70126	6.47327	9.56837	2.68379e-11	3.49995e-10	15.4674
ENSG00000078804	DYRK1B	1.53131	3.76618	9.56741	2.69068e-11	3.50559e-10	15.7591
ENSG00000273329	NDUFB6	0.629766	6.7581	9.56379	2.71688e-11	3.53634e-10	15.3975
ENSG00000137462	MRPS33	0.784413	6.33619	9.56153	2.73334e-11	3.55438e-10	15.4697
ENSG00000119138	NFKBIE	1.07565	4.87981	9.55181	2.80527e-11	3.64445e-10	15.641
ENSG00000137070	SPTAN1	-0.604554	8.66585	-9.55022	2.81721e-11	3.65648e-10	15.1582
ENSG00000236921	LAMB2	-0.849323	6.21781	-9.54796	2.83428e-11	3.67515e-10	15.5106
ENSG00000204869	CEP164	-1.00063	5.28353	-9.54082	2.88888e-11	3.74119e-10	15.6516
ENSG00000244161	KLHL42	-1.01527	5.46231	-9.54059	2.89069e-11	3.74119e-10	15.6358
ENSG00000278989	UBL7	0.832055	5.2924	9.53695	2.91896e-11	3.77419e-10	15.5574
ENSG00000280213	CCNG1	0.64109	6.9435	9.53548	2.93049e-11	3.78551e-10	15.3129
ENSG00000146094	ACBD5	0.608732	6.60897	9.53448	2.9383e-11	3.79202e-10	15.3263
ENSG00000165879	CDH17	0.890276	5.04077	9.53254	2.95365e-11	3.80822e-10	15.5795
ENSG00000278600	ADGRE5	0.667147	6.24369	9.53003	2.97354e-11	3.83025e-10	15.3575
ENSG00000256967	NA	0.90247	6.32893	9.52784	2.991e-11	3.84912e-10	15.385
ENSG00000287024	SUCLG2	0.625862	6.62226	9.52221	3.0364e-11	3.90023e-10	15.3012
ENSG00000100918	NA	0.867817	6.97068	9.52221	3.03643e-11	3.90023e-10	15.2519
ENSG00000227403	AFAP1L2	-1.03329	5.48549	-9.52072	3.04856e-11	3.91213e-10	15.5764
ENSG00000231369	ACAT1	0.657338	6.47262	9.51993	3.05499e-11	3.91669e-10	15.3283
ENSG00000250251	ALKBH7	1.37031	3.97885	9.51187	3.12169e-11	3.99471e-10	15.6149
ENSG00000260007	FAR1	-0.773518	7.08043	-9.5119	3.12142e-11	3.99471e-10	15.3089
ENSG00000213398	FZD2	-0.866668	5.52323	-9.50876	3.14775e-11	4.02428e-10	15.478
ENSG00000181754	SF3B5	0.723233	6.30151	9.50666	3.16553e-11	4.04324e-10	15.2914
ENSG00000276529	UTP14A	-0.888394	5.93503	-9.50131	3.2112e-11	4.09773e-10	15.4493
ENSG00000204316	HDAC7	-1.06915	5.64271	-9.50095	3.21433e-11	4.0979e-10	15.5033
ENSG00000222009	DECR1	0.839729	5.78444	9.48855	3.32293e-11	4.2324e-10	15.3544
ENSG00000241764	NUTF2	0.588112	7.44224	9.47176	3.4761e-11	4.42336e-10	15.0444
ENSG00000271870	CCDC86	-1.03974	5.89377	-9.46375	3.55163e-11	4.51526e-10	15.3655
ENSG00000255135	CAT	0.710603	6.27398	9.45664	3.62011e-11	4.59805e-10	15.1899
ENSG00000262580	EPS8L2	-0.881764	6.71043	-9.45351	3.65062e-11	4.62818e-10	15.1987
ENSG00000132801	BIK	3.03994	1.17143	9.45376	3.64819e-11	4.62818e-10	14.3825
ENSG00000228742	EDRF1	-1.10701	5.34703	-9.43784	3.80762e-11	4.82275e-10	15.3923
ENSG00000163376	AGO2	-0.940789	6.17711	-9.43734	3.81272e-11	4.82474e-10	15.2768
ENSG00000264717	ZFYVE1	1.21929	4.19741	9.43643	3.82206e-11	4.83207e-10	15.4099
ENSG00000223551	NA	0.846243	5.93439	9.43594	3.82716e-11	4.83405e-10	15.2034
ENSG00000269821	UPF3B	-1.15746	5.47139	-9.42947	3.89433e-11	4.91434e-10	15.3683
ENSG00000160781	MYC	-0.755161	6.62086	-9.42362	3.95604e-11	4.98761e-10	15.1376
ENSG00000236947	SUPT6H	-0.636996	7.74562	-9.42139	3.97987e-11	5.01302e-10	14.9466
ENSG00000275895	ITGB4	-0.80694	7.2745	-9.41699	4.02724e-11	5.06801e-10	14.9877
ENSG00000170915	NA	-1.05752	5.06837	-9.41099	4.09277e-11	5.14574e-10	15.3205
ENSG00000278023	STIP1	-0.445967	9.08253	-9.40982	4.10571e-11	5.15725e-10	14.7211
ENSG00000280347	LAMTOR2	0.790301	5.95034	9.40891	4.11571e-11	5.16506e-10	15.0932
ENSG00000261490	SF1	-0.564549	7.69731	-9.40783	4.12771e-11	5.17537e-10	14.8932
ENSG00000133134	NIN	-0.895404	6.15406	-9.40627	4.14507e-11	5.18902e-10	15.1782
ENSG00000237506	CELSR1	-0.736783	6.74577	-9.40617	4.1462e-11	5.18902e-10	15.0466
ENSG00000229152	LAMTOR5	0.663802	6.38361	9.40479	4.16164e-11	5.20358e-10	15.0313
ENSG00000180592	ZDHHC4	0.948688	5.13888	9.40162	4.19738e-11	5.24346e-10	15.2013
ENSG00000102385	ZNF770	-0.933876	6.06049	-9.39629	4.25801e-11	5.31434e-10	15.1996
ENSG00000270959	GTF3C1	-0.791948	6.90341	-9.39279	4.29832e-11	5.35676e-10	15.0023
ENSG00000109107	SYNGR2	0.557	7.97661	9.39266	4.29985e-11	5.35676e-10	14.739
ENSG00000213020	EPHX1	0.514241	7.66636	9.38829	4.35081e-11	5.41531e-10	14.7895
ENSG00000196104	PSME2	0.644926	7.3659	9.38197	4.42549e-11	5.50324e-10	14.8095
ENSG00000004139	JUP	0.772801	6.58346	9.3806	4.44196e-11	5.5187e-10	14.8803
ENSG00000214290	EHBP1	-0.69866	6.4849	-9.37995	4.44968e-11	5.52326e-10	15.0234
ENSG00000275464	NDUFB7	0.904357	5.90682	9.37902	4.4609e-11	5.53071e-10	15.027
ENSG00000173805	LAMP2	0.56541	7.29716	9.37878	4.46378e-11	5.53071e-10	14.8304
ENSG00000255624	PHLPP2	-0.966293	5.433	-9.37788	4.47458e-11	5.53906e-10	15.2087
ENSG00000140807	CDC42	0.540489	8.06053	9.36186	4.67215e-11	5.77839e-10	14.6547
ENSG00000155657	NDUFS2	0.595122	7.31582	9.36109	4.68182e-11	5.78512e-10	14.7539
ENSG00000138185	CYTH3	-0.879287	5.71251	-9.35346	4.77925e-11	5.90017e-10	15.0928
ENSG00000179698	MAPRE1	0.416683	8.77023	9.35237	4.7934e-11	5.91229e-10	14.5438
ENSG00000114200	ZBED5	-0.670837	6.58022	-9.34951	4.83046e-11	5.95262e-10	14.9141
ENSG00000148513	MDH2	0.465971	8.44561	9.3478	4.85283e-11	5.9748e-10	14.5654
ENSG00000204758	NA	0.76059	6.27079	9.34699	4.86343e-11	5.98245e-10	14.878
ENSG00000245275	KLHL12	0.684509	6.12677	9.34606	4.87568e-11	5.99213e-10	14.9173
ENSG00000089692	LETM1	-0.87789	5.81708	-9.34551	4.88296e-11	5.99568e-10	15.056
ENSG00000266278	MLPH	-0.529789	7.91826	-9.34263	4.921e-11	6.03696e-10	14.6586
ENSG00000279382	NBDY	0.908152	5.55446	9.33521	5.02072e-11	6.15376e-10	14.9702
ENSG00000185760	PDE10A	-0.923906	5.31207	-9.3258	5.15003e-11	6.30659e-10	15.0656
ENSG00000198933	POLE4	0.830989	5.91017	9.32149	5.21034e-11	6.37472e-10	14.8788
ENSG00000261505	CCNDBP1	0.771591	5.50877	9.31912	5.24374e-11	6.40874e-10	14.9327
ENSG00000197872	UBE2G2	-0.874322	6.15338	-9.31853	5.25222e-11	6.40874e-10	14.9294
ENSG00000287431	PSMB2	0.552848	7.9577	9.31882	5.24811e-11	6.40874e-10	14.5713
ENSG00000263826	CCNE1	-0.947962	5.2339	-9.31519	5.29978e-11	6.461e-10	15.0467
ENSG00000155961	CLASRP	-1.23111	5.11142	-9.31091	5.36154e-11	6.53046e-10	15.0711
ENSG00000106689	SELENOI	-0.719588	6.95007	-9.30785	5.40611e-11	6.57888e-10	14.7824
ENSG00000236969	ELAC2	-0.586457	7.44007	-9.30387	5.46463e-11	6.64417e-10	14.6338
ENSG00000140465	SLC41A1	-0.796527	6.02767	-9.30215	5.49007e-11	6.66541e-10	14.9165
ENSG00000145990	NA	0.796109	5.40429	9.3017	5.49675e-11	6.66541e-10	14.9005
ENSG00000151651	CHORDC1	-0.625244	7.36032	-9.30173	5.49633e-11	6.66541e-10	14.7271
ENSG00000137393	C1GALT1C1	0.731012	5.82264	9.28341	5.77577e-11	6.99754e-10	14.7755
ENSG00000279041	MARCKS	0.667148	6.53588	9.27428	5.92043e-11	7.16645e-10	14.6026
ENSG00000141665	2020-03-04	-1.5561	4.42979	-9.27237	5.95111e-11	7.1972e-10	14.9451
ENSG00000280195	RPL26	0.572585	8.51137	9.26677	6.04216e-11	7.30085e-10	14.3512
ENSG00000149927	TXLNGY	-1.24657	5.34772	-9.26627	6.05033e-11	7.30427e-10	14.9395
ENSG00000108352	HSD17B10	0.585491	7.02601	9.25916	6.16806e-11	7.43982e-10	14.5217
ENSG00000087884	DCTN3	0.757458	6.16643	9.2565	6.21265e-11	7.48698e-10	14.6693
ENSG00000226287	MTX3	-1.25468	4.88316	-9.25424	6.25086e-11	7.52638e-10	14.9377
ENSG00000090661	ARRB1	1.25789	4.18392	9.25312	6.2699e-11	7.54267e-10	14.9184
ENSG00000164616	KAT6A	-0.746101	6.2484	-9.24833	6.35181e-11	7.63447e-10	14.7148
ENSG00000178977	CDC6	-0.591048	7.22594	-9.248	6.35758e-11	7.63468e-10	14.5396
ENSG00000100060	CTNND1	0.412948	8.40187	9.24409	6.42534e-11	7.70928e-10	14.2914
ENSG00000263272	MICOS13	0.882102	5.03405	9.23478	6.58976e-11	7.89962e-10	14.7668
ENSG00000196275	SLC16A13	1.35683	3.80398	9.23006	6.67481e-11	7.99455e-10	14.8737
ENSG00000270012	SMARCC2	-0.753645	6.17828	-9.22651	6.73945e-11	8.0649e-10	14.6559
ENSG00000160285	VAV2	-0.987277	5.9247	-9.22596	6.74946e-11	8.06981e-10	14.7374
ENSG00000141337	CNBP	-0.438672	8.6551	-9.21192	7.0118e-11	8.37613e-10	14.2115
ENSG00000132141	PLCB4	-0.934631	5.52937	-9.21017	7.04519e-11	8.40681e-10	14.7321
ENSG00000095059	ANKFY1	-0.590179	7.17522	-9.20993	7.0498e-11	8.40681e-10	14.4452
ENSG00000235655	RARB	1.33115	3.75498	9.20918	7.06417e-11	8.40979e-10	14.813
ENSG00000065621	CHMP5	0.663325	6.82361	9.20916	7.06461e-11	8.40979e-10	14.4507
ENSG00000245149	ABCE1	-0.533661	7.4499	-9.20516	7.14184e-11	8.49431e-10	14.3775
ENSG00000266967	PCNT	-1.08455	5.78619	-9.19931	7.25637e-11	8.6202e-10	14.6778
ENSG00000179859	CRTAP	0.430674	8.64238	9.19911	7.26031e-11	8.6202e-10	14.1352
ENSG00000226332	LARP4B	-0.63043	6.73922	-9.1957	7.32784e-11	8.69282e-10	14.4993
ENSG00000139160	AXIN2	-3.0728	2.76456	-9.19488	7.34439e-11	8.70489e-10	13.3864
ENSG00000184058	ARL3	0.691211	6.11871	9.19073	7.42771e-11	8.796e-10	14.4875
ENSG00000264577	ATP5MF	0.637477	6.63178	9.1883	7.47697e-11	8.84666e-10	14.3875
ENSG00000226328	RDX	-0.585359	7.25444	-9.17735	7.70304e-11	9.10626e-10	14.3395
ENSG00000262903	CPNE7	-1.29879	5.40598	-9.17521	7.74808e-11	9.15158e-10	14.6749
ENSG00000183682	NCEH1	-0.526992	7.1945	-9.17274	7.80026e-11	9.20525e-10	14.3028
ENSG00000103316	YBX1	0.401721	9.05736	9.16896	7.881e-11	9.29251e-10	14.0077
ENSG00000163803	F11R	0.987104	4.98467	9.16758	7.91079e-11	9.31958e-10	14.5978
ENSG00000180172	IFRD1	-0.994452	5.91547	-9.16187	8.03456e-11	9.44908e-10	14.619
ENSG00000120057	KNTC1	-0.728089	6.89788	-9.16203	8.0312e-11	9.44908e-10	14.3787
ENSG00000115718	METTL3	-0.711219	6.54986	-9.14477	8.41784e-11	9.89133e-10	14.3821
ENSG00000114923	UAP1L1	1.4203	3.80542	9.14092	8.50663e-11	9.98706e-10	14.6322
ENSG00000284691	WASHC3	0.949482	5.10269	9.13602	8.62117e-11	1.01128e-09	14.5126
ENSG00000288096	NEURL4	-1.34681	4.84256	-9.12944	8.77734e-11	1.02872e-09	14.6035
ENSG00000076258	NA	0.704918	6.16362	9.12392	8.91038e-11	1.04342e-09	14.2968
ENSG00000197467	STARD4	1.16224	4.36645	9.12122	8.97636e-11	1.05024e-09	14.5644
ENSG00000104894	NA	1.83588	2.74565	9.11696	9.08134e-11	1.06161e-09	14.4807
ENSG00000187775	PDIA6	0.427332	8.19675	9.11368	9.16298e-11	1.07024e-09	13.9691
ENSG00000181773	HIPK1	-0.762419	5.96235	-9.10996	9.25661e-11	1.08025e-09	14.4024
ENSG00000135205	LPP	-0.672828	6.56379	-9.10569	9.36518e-11	1.09199e-09	14.2815
ENSG00000223756	NA	0.796011	5.7794	9.09817	9.55943e-11	1.11369e-09	14.2823
ENSG00000088340	CCDC88A	-0.726158	6.58253	-9.09552	9.62893e-11	1.12083e-09	14.2438
ENSG00000213963	SCCPDH	0.543509	7.18682	9.09492	9.64478e-11	1.12172e-09	14.0579
ENSG00000174977	AKAP13	0.603192	7.09141	9.09047	9.76282e-11	1.13448e-09	14.0541
ENSG00000239407	ASCC1	0.72149	5.9843	9.08362	9.94732e-11	1.15494e-09	14.2362
ENSG00000228672	TMEM99	0.930417	4.63602	9.07879	1.00794e-10	1.16928e-09	14.3952
ENSG00000270890	RPL30	0.683962	7.92902	9.07641	1.01454e-10	1.17593e-09	13.903
ENSG00000180425	IFI35	1.03075	4.693	9.07405	1.02109e-10	1.18224e-09	14.395
ENSG00000241293	GOLIM4	-0.966716	5.43538	-9.07374	1.02196e-10	1.18224e-09	14.3731
ENSG00000129646	NACC2	-0.816618	6.22161	-9.07352	1.02257e-10	1.18224e-09	14.222
ENSG00000129991	KITLG	-1.07667	5.19665	-9.06732	1.04008e-10	1.20147e-09	14.385
ENSG00000177932	TOP1	-0.67763	7.13059	-9.06597	1.04392e-10	1.20386e-09	14.0676
ENSG00000276672	GNS	0.446318	7.93987	9.06617	1.04334e-10	1.20386e-09	13.8732
ENSG00000156500	HEATR1	-0.617723	7.20683	-9.05233	1.08362e-10	1.24858e-09	13.9999
ENSG00000134258	NDUFB2	0.693264	6.71961	9.05056	1.08889e-10	1.2536e-09	13.996
ENSG00000181101	HGS	-0.700427	6.87552	-9.04319	1.11111e-10	1.2781e-09	14.05
ENSG00000101445	FHOD1	-0.893349	5.26389	-9.04224	1.11398e-10	1.28033e-09	14.2886
ENSG00000280237	AVPI1	0.709553	6.49924	9.04168	1.11569e-10	1.28121e-09	14.0018
ENSG00000086717	NA	0.757508	6.28053	9.02726	1.16065e-10	1.33173e-09	14.0244
ENSG00000164056	KIAA0753	-0.845953	5.80939	-9.02609	1.16439e-10	1.3349e-09	14.1991
ENSG00000280046	PABPC1L	-2.26329	3.6447	-9.01919	1.18662e-10	1.35924e-09	13.9208
ENSG00000163644	SIPA1L3	-0.81882	6.57823	-9.0168	1.19444e-10	1.36704e-09	14.0087
ENSG00000239883	FUT8	0.837883	5.31975	9.01607	1.19683e-10	1.36863e-09	14.143
ENSG00000186076	FIBP	0.686381	6.54421	9.01549	1.19872e-10	1.36965e-09	13.9227
ENSG00000286011	JADE1	-0.770741	5.92653	-9.00791	1.22392e-10	1.39727e-09	14.1028
ENSG00000177494	FRK	0.964072	4.74913	9.00684	1.22751e-10	1.4002e-09	14.2093
ENSG00000233396	MCMBP	-0.497776	7.52054	-9.00619	1.22971e-10	1.40154e-09	13.8138
ENSG00000269069	C1S	0.63506	6.31576	9.00299	1.24056e-10	1.41272e-09	13.9562
ENSG00000168505	RRAGD	1.57289	3.38576	8.99766	1.25883e-10	1.43234e-09	14.2438
ENSG00000249867	TXN2	0.646961	6.16386	8.99709	1.26079e-10	1.43297e-09	13.9354
ENSG00000144355	DHX32	0.640748	6.62064	8.99689	1.26148e-10	1.43297e-09	13.8896
ENSG00000250071	NFU1	0.745663	5.59444	8.9952	1.26735e-10	1.43844e-09	14.0442
ENSG00000120675	WNT7B	-0.590453	6.64609	-8.99109	1.28174e-10	1.45356e-09	13.8576
ENSG00000256667	NSA2	0.577588	7.36938	8.98385	1.30747e-10	1.48151e-09	13.7306
ENSG00000185250	CHMP1B	0.838218	5.24728	8.98348	1.3088e-10	1.48178e-09	14.0681
ENSG00000225828	GM2A	0.885609	5.3454	8.97957	1.32294e-10	1.49656e-09	14.0145
ENSG00000143387	ANKRD1	-2.15279	3.8639	-8.97781	1.32935e-10	1.50256e-09	13.9295
ENSG00000167895	SOAT1	0.67908	6.48501	8.97701	1.33227e-10	1.50462e-09	13.8534
ENSG00000166839	EPB41	0.995253	4.82382	8.97289	1.34747e-10	1.52052e-09	14.1191
ENSG00000196220	RHOD	1.33786	4.26498	8.96929	1.36084e-10	1.53397e-09	14.1444
ENSG00000170373	SPCS1	0.576079	6.94983	8.96908	1.36163e-10	1.53397e-09	13.7464
ENSG00000170684	COL4A2	-0.573979	7.93137	-8.96852	1.36373e-10	1.53507e-09	13.6478
ENSG00000268205	TAF1	-0.762733	6.00523	-8.9681	1.36531e-10	1.53558e-09	13.9925
ENSG00000258012	ZNF629	-1.02202	5.35435	-8.96713	1.36894e-10	1.53839e-09	14.1116
ENSG00000242951	AFG3L1P	-1.24478	4.69571	-8.96478	1.37783e-10	1.54711e-09	14.1656
ENSG00000158865	TBC1D9B	-0.639806	7.37184	-8.95957	1.39771e-10	1.56815e-09	13.7081
ENSG00000198208	PGLS	0.827406	5.65726	8.95832	1.40252e-10	1.57225e-09	13.9172
ENSG00000085514	NAGLU	0.71485	5.79981	8.95239	1.42556e-10	1.59637e-09	13.8563
ENSG00000121966	NA	0.733787	6.38442	8.95219	1.42637e-10	1.59637e-09	13.7793
ENSG00000229184	RRAS	0.6739	6.00098	8.95158	1.42874e-10	1.59771e-09	13.8241
ENSG00000119283	DTL	-0.694781	6.44412	-8.94884	1.43955e-10	1.60848e-09	13.8555
ENSG00000196074	BCL2L2	-0.958624	5.3575	-8.94431	1.45764e-10	1.62736e-09	14.0451
ENSG00000255893	PIF1	-1.28705	4.44813	-8.9386	1.48071e-10	1.65176e-09	14.0919
ENSG00000130699	TFAP2A	-1.46214	4.28444	-8.93757	1.4849e-10	1.65509e-09	14.0865
ENSG00000263002	JOSD2	0.908325	5.54897	8.93329	1.50252e-10	1.67337e-09	13.8725
ENSG00000224660	CCNB2	0.52221	7.67482	8.92674	1.52986e-10	1.70242e-09	13.4867
ENSG00000158486	NTPCR	0.709581	5.98323	8.92319	1.54489e-10	1.71775e-09	13.7738
ENSG00000111728	ZFAND6	0.539672	7.00536	8.91884	1.5635e-10	1.73703e-09	13.6028
ENSG00000206149	UQCRC2	0.443876	7.95013	8.91613	1.57524e-10	1.74865e-09	13.4538
ENSG00000170889	TUBGCP6	-1.80197	4.34326	-8.91477	1.58114e-10	1.75377e-09	13.9982
ENSG00000175040	GATD1	-0.970612	5.33874	-8.91057	1.59954e-10	1.77273e-09	13.9255
ENSG00000135740	MRPS16	0.509248	7.35539	8.9052	1.62338e-10	1.7977e-09	13.4924
ENSG00000244560	IFIT3	1.69854	3.01062	8.90464	1.62589e-10	1.79902e-09	13.9273
ENSG00000282978	ANKRD22	2.70586	1.25252	8.90375	1.62988e-10	1.80198e-09	13.1372
ENSG00000271533	CDC42SE2	0.590129	6.56764	8.90196	1.63795e-10	1.80943e-09	13.6214
ENSG00000264107	DPY19L3	-0.750158	6.0237	-8.90139	1.64055e-10	1.81084e-09	13.8035
ENSG00000138311	ERRFI1	0.587029	6.97633	8.89827	1.65471e-10	1.82499e-09	13.5735
ENSG00000066923	LPIN2	0.690855	5.92517	8.89734	1.65894e-10	1.82819e-09	13.7224
ENSG00000237758	NAT10	-0.659824	6.84143	-8.89561	1.66687e-10	1.83544e-09	13.6278
ENSG00000283511	ATP5PO	0.859501	5.64915	8.89469	1.67115e-10	1.83867e-09	13.7461
ENSG00000128408	C14orf119	0.615705	6.61638	8.89023	1.69181e-10	1.8599e-09	13.5577
ENSG00000080947	UQCRB	0.755155	7.79506	8.88774	1.70348e-10	1.87123e-09	13.3924
ENSG00000244073	LSG1	-0.692772	6.23438	-8.88281	1.72681e-10	1.89532e-09	13.7131
ENSG00000161912	YIF1B	0.674886	6.63795	8.88072	1.73679e-10	1.90474e-09	13.5353
ENSG00000170006	MCM3	-0.506951	7.53861	-8.87787	1.75052e-10	1.91827e-09	13.435
ENSG00000269352	E2F4	-0.715348	6.63517	-8.86843	1.79675e-10	1.96577e-09	13.5824
ENSG00000225972	DDRGK1	0.533083	6.88047	8.86866	1.79557e-10	1.96577e-09	13.479
ENSG00000260231	RNF182	-1.51197	4.491	-8.86812	1.79826e-10	1.96585e-09	13.8959
ENSG00000258704	KCNN4	0.82432	5.51123	8.86724	1.80262e-10	1.96904e-09	13.6698
ENSG00000278133	MCTS1	0.630251	6.81335	8.86525	1.8126e-10	1.97836e-09	13.4864
ENSG00000261455	S100P	1.2006	4.36892	8.86383	1.81969e-10	1.98451e-09	13.8702
ENSG00000259065	PTPA	0.460046	7.68895	8.86272	1.82529e-10	1.98903e-09	13.3193
ENSG00000198468	FAM107B	0.493425	8.24266	8.8582	1.84824e-10	2.01243e-09	13.2627
ENSG00000225094	PPAT	-0.882565	5.45072	-8.85272	1.87643e-10	2.04045e-09	13.7686
ENSG00000280173	ATP6V1D	0.598669	6.71712	8.85261	1.87696e-10	2.04045e-09	13.4759
ENSG00000173110	IFITM2	0.84693	5.38174	8.84612	1.91094e-10	2.07409e-09	13.6414
ENSG00000213904	SNHG5	0.581844	8.03159	8.84616	1.91074e-10	2.07409e-09	13.2484
ENSG00000275832	IFT22	0.694453	5.64713	8.84231	1.93118e-10	2.09438e-09	13.5999
ENSG00000198932	SNX2	0.625013	6.49949	8.84083	1.93912e-10	2.09966e-09	13.4685
ENSG00000272288	NA	0.679155	7.2762	8.84103	1.93803e-10	2.09966e-09	13.3155
ENSG00000134538	HTRA1	0.622838	6.22339	8.83584	1.96604e-10	2.12557e-09	13.4885
ENSG00000174775	PTBP1	-0.514095	8.27081	-8.83582	1.96616e-10	2.12557e-09	13.2099
ENSG00000132692	CDC25A	-1.37979	4.58467	-8.83022	1.99684e-10	2.15703e-09	13.8035
ENSG00000231686	NXF1	-0.626722	6.69298	-8.82833	2.00734e-10	2.16665e-09	13.4666
ENSG00000186603	KLF4	1.05812	4.44531	8.82754	2.01169e-10	2.16964e-09	13.7589
ENSG00000133863	PIGU	0.694453	5.82028	8.82682	2.01571e-10	2.17226e-09	13.518
ENSG00000251017	EFR3B	-1.09578	4.84764	-8.82543	2.0235e-10	2.17721e-09	13.7669
ENSG00000101115	VDAC1	0.379636	9.06637	8.82562	2.0224e-10	2.17721e-09	13.0498
ENSG00000182324	EME2	-2.38657	3.32691	-8.82493	2.02631e-10	2.17852e-09	13.3229
ENSG00000226564	NA	1.5395	3.26412	8.82206	2.04245e-10	2.19414e-09	13.7438
ENSG00000181619	XRCC5	0.369517	9.35832	8.82098	2.04855e-10	2.19897e-09	12.9941
ENSG00000197608	STARD10	1.19065	4.24946	8.8145	2.08562e-10	2.237e-09	13.732
ENSG00000215788	ATAD2	-0.533567	7.44074	-8.81315	2.09345e-10	2.24364e-09	13.2973
ENSG00000188959	TWNK	-0.896104	5.6972	-8.81214	2.09931e-10	2.24815e-09	13.6157
ENSG00000007237	METRN	0.684991	5.84119	8.80784	2.12443e-10	2.27327e-09	13.4381
ENSG00000130829	RPL39L	0.791563	5.27025	8.79913	2.17633e-10	2.32698e-09	13.556
ENSG00000215154	GTF2H5	0.828671	5.25693	8.79643	2.19267e-10	2.34262e-09	13.5397
ENSG00000286587	GSE1	-0.798772	5.92526	-8.79571	2.19705e-10	2.34547e-09	13.5188
ENSG00000131127	TRAPPC2L	0.661077	5.98665	8.79343	2.21093e-10	2.35844e-09	13.4095
ENSG00000288066	CEP170B	-1.16634	5.90342	-8.78873	2.23995e-10	2.38753e-09	13.5901
ENSG00000228549	OGT	-0.590588	7.96614	-8.78625	2.2554e-10	2.40212e-09	13.167
ENSG00000127585	DDIT3	1.83859	3.06583	8.7852	2.26198e-10	2.40725e-09	13.4975
ENSG00000273891	NOTCH1	-1.38219	5.29515	-8.78361	2.27192e-10	2.41595e-09	13.6526
ENSG00000176700	P2RX4	1.06662	4.39915	8.77868	2.30319e-10	2.44729e-09	13.6268
ENSG00000163463	NSMCE1	0.746517	5.68817	8.77617	2.31933e-10	2.46253e-09	13.4141
ENSG00000236229	TMEM144	1.34559	3.54687	8.77528	2.32503e-10	2.46562e-09	13.6538
ENSG00000100055	PTPRF	-0.685504	8.09807	-8.77515	2.32585e-10	2.46562e-09	13.0805
ENSG00000233818	NOL11	-0.550004	7.40043	-8.76922	2.36441e-10	2.50456e-09	13.1798
ENSG00000170703	AGTRAP	0.81833	5.50279	8.76427	2.39717e-10	2.53728e-09	13.4006
ENSG00000273142	SUPT5H	-0.562654	8.01229	-8.75678	2.44747e-10	2.5884e-09	13.0486
ENSG00000267858	ABCC3	-0.466653	9.06867	-8.75652	2.44925e-10	2.5884e-09	12.8758
ENSG00000231789	SERINC3	0.482312	7.73429	8.74791	2.50852e-10	2.64898e-09	13.0275
ENSG00000102409	TMEM256	0.933506	4.96957	8.74586	2.52279e-10	2.65993e-09	13.4377
ENSG00000283050	CHMP3	0.558748	7.20228	8.74591	2.52245e-10	2.65993e-09	13.0822
ENSG00000259429	MEA1	0.650876	6.2353	8.74417	2.53465e-10	2.67038e-09	13.2344
ENSG00000187867	PLCB3	-1.08123	5.27036	-8.74254	2.54617e-10	2.68045e-09	13.4836
ENSG00000257261	PBXIP1	0.907775	4.844	8.73632	2.59053e-10	2.72398e-09	13.4573
ENSG00000177855	GOT2	0.418734	8.45568	8.73619	2.59152e-10	2.72398e-09	12.88
ENSG00000174899	CAMSAP1	-0.832635	6.04374	-8.73195	2.6222e-10	2.75412e-09	13.349
ENSG00000244165	PRPF39	-0.893933	5.77533	-8.7306	2.63202e-10	2.76231e-09	13.4068
ENSG00000085465	RBMS2	-0.813435	5.77137	-8.72965	2.63898e-10	2.76749e-09	13.3474
ENSG00000115657	MKRN1	0.585817	7.08857	8.72897	2.64401e-10	2.77063e-09	13.0593
ENSG00000214776	GADD45B	-1.24944	4.88004	-8.72564	2.6686e-10	2.79425e-09	13.5192
ENSG00000150540	JAG2	-1.87655	3.45212	-8.71804	2.72558e-10	2.85172e-09	13.3076
ENSG00000262468	RPL7	0.631105	8.26642	8.71351	2.76008e-10	2.88562e-09	12.839
ENSG00000214193	ATP11A	-0.99298	5.29779	-8.71002	2.78699e-10	2.91152e-09	13.4126
ENSG00000124813	ANKRD11	-0.747086	7.09644	-8.70795	2.80308e-10	2.92609e-09	13.1039
ENSG00000186198	RFLNB	-0.970138	5.00726	-8.70668	2.81305e-10	2.93426e-09	13.4263
ENSG00000221866	SWAP70	0.724269	6.33421	8.70255	2.84556e-10	2.9659e-09	13.1258
ENSG00000275410	SNRPC	0.68097	7.21276	8.70223	2.8481e-10	2.96629e-09	12.9542
ENSG00000187908	TRIO	-0.678936	7.52844	-8.70152	2.85368e-10	2.96983e-09	12.9933
ENSG00000231107	NA	0.492242	8.01243	8.695	2.90595e-10	3.02192e-09	12.8202
ENSG00000226781	SUN1	-0.628086	7.02237	-8.68812	2.96213e-10	3.078e-09	13.0254
ENSG00000136155	LZTS3	1.54372	2.96778	8.68751	2.96714e-10	3.08087e-09	13.3849
ENSG00000197976	ATP5F1C	0.56123	8.27988	8.6861	2.97889e-10	3.09071e-09	12.7621
ENSG00000213235	ARRDC3	1.00718	4.63997	8.67546	3.06842e-10	3.18056e-09	13.2945
ENSG00000247400	LDHB	0.655826	6.87113	8.67526	3.07015e-10	3.18056e-09	12.935
ENSG00000153395	RNF103	0.958668	4.62359	8.67368	3.08372e-10	3.19219e-09	13.2916
ENSG00000184574	CCN3	2.9193	1.49038	8.67001	3.11535e-10	3.2225e-09	12.5063
ENSG00000166816	PSPH	0.818743	5.56371	8.66815	3.13154e-10	3.23679e-09	13.1858
ENSG00000180747	WDR54	0.781656	5.77177	8.66575	3.1526e-10	3.25609e-09	13.0899
ENSG00000257270	SRSF5	-0.532791	7.75229	-8.6647	3.16187e-10	3.2632e-09	12.8299
ENSG00000230650	NA	0.724593	7.46391	8.66155	3.18973e-10	3.28946e-09	12.8032
ENSG00000007314	EVA1A	-1.23425	4.42932	-8.65659	3.23416e-10	3.33277e-09	13.3319
ENSG00000227543	COPS9	0.648293	5.99835	8.65265	3.26985e-10	3.36701e-09	13.015
ENSG00000180385	RASSF3	0.791294	5.67238	8.65067	3.28798e-10	3.38313e-09	13.0832
ENSG00000188234	PPM1F	-1.02565	5.38462	-8.65038	3.29065e-10	3.38332e-09	13.2167
ENSG00000169946	FUNDC2	0.766908	6.11095	8.64959	3.2979e-10	3.38823e-09	12.9808
ENSG00000235687	CCAR2	-0.707784	6.41116	-8.64891	3.30414e-10	3.39208e-09	13.0105
ENSG00000153404	OSBPL3	-0.897495	5.64247	-8.64467	3.34346e-10	3.42987e-09	13.1814
ENSG00000166262	TRANK1	1.6016	2.94761	8.64063	3.38136e-10	3.46355e-09	13.2442
ENSG00000002586	ABHD14B	0.947473	5.06179	8.64088	3.379e-10	3.46355e-09	13.1229
ENSG00000225783	MRFAP1	0.409552	8.58816	8.63783	3.40788e-10	3.48809e-09	12.5789
ENSG00000135636	BCAR3	-0.724936	6.1172	-8.63653	3.42022e-10	3.49811e-09	13.0363
ENSG00000170271	SRSF10	-0.561831	7.33006	-8.63253	3.45861e-10	3.53472e-09	12.8198
ENSG00000261094	ZNF469	-1.58306	3.974	-8.63173	3.46635e-10	3.53998e-09	13.2394
ENSG00000234801	UACA	-0.565309	7.40008	-8.63053	3.478e-10	3.54922e-09	12.7792
ENSG00000285979	TICRR	-0.938133	5.66173	-8.62953	3.48769e-10	3.55645e-09	13.1267
ENSG00000139187	COX14	0.7794	5.40651	8.62841	3.49867e-10	3.56499e-09	13.0608
ENSG00000135604	CMTM3	0.596725	6.04381	8.62542	3.52798e-10	3.59218e-09	12.8869
ENSG00000174529	ATRX	-0.630984	6.93759	-8.62066	3.57518e-10	3.63752e-09	12.8683
ENSG00000213397	NDUFS4	0.682073	6.27329	8.6195	3.58677e-10	3.64117e-09	12.8946
ENSG00000107731	RAB10	0.402485	8.56633	8.61963	3.58546e-10	3.64117e-09	12.5426
ENSG00000228192	AMHR2	2.87524	0.928651	8.61972	3.58457e-10	3.64117e-09	12.4092
ENSG00000135722	DBF4B	-0.81468	5.44184	-8.61588	3.62318e-10	3.6754e-09	13.0918
ENSG00000261324	SLC12A4	-1.17432	5.16673	-8.61537	3.62835e-10	3.67791e-09	13.1782
ENSG00000183569	RAP1GAP	0.804978	5.6246	8.61249	3.6577e-10	3.70491e-09	12.959
ENSG00000251432	SF3B6	0.637531	7.01062	8.60907	3.69277e-10	3.73766e-09	12.7343
ENSG00000185267	ATP5MD	0.656422	7.31675	8.60654	3.71895e-10	3.76137e-09	12.6741
ENSG00000271933	BAZ1A	-0.682684	6.54404	-8.59807	3.80803e-10	3.84862e-09	12.8421
ENSG00000185664	SMIM19	0.923027	4.80967	8.59601	3.83008e-10	3.86804e-09	13.0568
ENSG00000228109	RTF1	-0.77679	6.05783	-8.5923	3.87002e-10	3.90549e-09	12.9347
ENSG00000260423	ABCA12	1.47187	3.67763	8.58922	3.90342e-10	3.93628e-09	13.1491
ENSG00000280152	RHOC	0.579912	7.19022	8.58337	3.96786e-10	3.99831e-09	12.6042
ENSG00000131480	NDUFA12	0.750296	6.45019	8.58028	4.00236e-10	4.02713e-09	12.7481
ENSG00000183022	CSDE1	0.389399	8.97043	8.58034	4.00164e-10	4.02713e-09	12.3834
ENSG00000180044	WDR90	-1.53865	4.55671	-8.57989	4.00669e-10	4.02852e-09	13.1245
ENSG00000262402	NPTX1	-1.50469	4.22428	-8.5789	4.01775e-10	4.03667e-09	13.1181
ENSG00000125122	SEC61G	0.627899	7.13402	8.56933	4.12688e-10	4.14326e-09	12.6039
ENSG00000005513	RBM12	-0.544627	6.7154	-8.56125	4.22123e-10	4.23488e-09	12.6939
ENSG00000279233	TRAF3IP2	1.19745	4.13922	8.56005	4.23545e-10	4.24602e-09	13.0437
ENSG00000260630	STX5	0.751025	5.33786	8.55461	4.30051e-10	4.30493e-09	12.8885
ENSG00000270673	CLDN1	-0.646824	6.59542	-8.55475	4.29878e-10	4.30493e-09	12.719
ENSG00000072041	ELK4	-0.930258	5.31236	-8.55283	4.32199e-10	4.3201e-09	12.9693
ENSG00000158220	DMAC1	0.790388	5.47639	8.55283	4.32196e-10	4.3201e-09	12.8162
ENSG00000230715	CANX	0.30094	10.3995	8.55137	4.33962e-10	4.33455e-09	12.1215
ENSG00000226312	HSPG2	-0.920443	7.38879	-8.54936	4.36414e-10	4.35585e-09	12.5774
ENSG00000274602	RAB7A	0.461299	7.8307	8.5445	4.42403e-10	4.4124e-09	12.4315
ENSG00000257576	CALCOCO2	0.483667	7.35375	8.54072	4.47111e-10	4.4561e-09	12.5062
ENSG00000279443	ARL2	0.762582	6.08106	8.53858	4.49798e-10	4.47961e-09	12.6548
ENSG00000196724	MYO5A	-0.616146	6.89839	-8.53362	4.56092e-10	4.53898e-09	12.6218
ENSG00000160145	SPINT2	0.537974	7.55581	8.52852	4.62662e-10	4.60101e-09	12.3944
ENSG00000248180	MGST2	0.831791	5.31369	8.52609	4.65833e-10	4.62918e-09	12.7764
ENSG00000138623	PWWP3A	-1.12702	5.2445	-8.5252	4.66988e-10	4.63727e-09	12.9337
ENSG00000236058	ATP5PF	0.6732	6.8282	8.52307	4.69795e-10	4.66176e-09	12.5171
ENSG00000168062	SMCHD1	-0.772764	6.35319	-8.5186	4.75713e-10	4.71372e-09	12.6851
ENSG00000249459	COPE	0.626732	6.10778	8.5186	4.75722e-10	4.71372e-09	12.6163
ENSG00000196366	GTF3A	0.550848	6.74955	8.51815	4.76317e-10	4.7162e-09	12.5061
ENSG00000130518	FHL2	-0.725428	6.38493	-8.51656	4.7845e-10	4.73388e-09	12.6906
ENSG00000147164	IL4I1	3.92443	0.186045	8.51273	4.83616e-10	4.78153e-09	10.2146
ENSG00000242689	PTRHD1	0.838756	4.82618	8.51214	4.84415e-10	4.78597e-09	12.8063
ENSG00000187796	TLR6	1.10417	4.64558	8.51155	4.85221e-10	4.79046e-09	12.8697
ENSG00000260328	PSMD13	0.445371	7.99025	8.50636	4.92343e-10	4.85726e-09	12.3064
ENSG00000272455	MCM3AP	-0.756484	6.21223	-8.50522	4.93924e-10	4.86934e-09	12.6744
ENSG00000273702	GLA	0.490416	7.58883	8.50335	4.96521e-10	4.89141e-09	12.3604
ENSG00000226193	ORMDL2	0.827522	5.157	8.49584	5.07096e-10	4.99199e-09	12.7087
ENSG00000137460	MXD4	1.06077	4.35657	8.49439	5.0917e-10	5.0088e-09	12.8489
ENSG00000224635	CREG1	0.527911	7.32899	8.49244	5.11962e-10	5.03263e-09	12.3609
ENSG00000285043	HNRNPA0	-0.510185	7.46251	-8.48943	5.16306e-10	5.07168e-09	12.3496
ENSG00000126246	SAFB2	-0.816772	5.95737	-8.48758	5.19002e-10	5.0945e-09	12.6478
ENSG00000258472	LIPH	1.00601	4.65613	8.47866	5.32168e-10	5.21998e-09	12.7492
ENSG00000136367	GRWD1	-0.55762	7.18967	-8.47686	5.34862e-10	5.24265e-09	12.3713
ENSG00000243679	HIPK2	-0.757718	6.69955	-8.47592	5.36275e-10	5.25272e-09	12.513
ENSG00000286431	CENPM	0.7342	5.30651	8.46747	5.49167e-10	5.37515e-09	12.5938
ENSG00000285796	ADGRE1	0.981455	4.33745	8.46402	5.54524e-10	5.42369e-09	12.7492
ENSG00000164008	COQ5	0.661753	6.01127	8.46362	5.5515e-10	5.42593e-09	12.4901
ENSG00000260219	GNG2	1.67859	2.64986	8.45696	5.65639e-10	5.52448e-09	12.7597
ENSG00000139908	TAF1D	-0.670885	6.82851	-8.45273	5.72408e-10	5.58661e-09	12.4235
ENSG00000105996	CNKSR2	-1.4176	4.40661	-8.45206	5.73488e-10	5.58916e-09	12.7736
ENSG00000140543	CAMK2G	-0.812846	5.8184	-8.45212	5.73405e-10	5.58916e-09	12.6283
ENSG00000228212	UCP2	0.699152	5.86095	8.44491	5.85146e-10	5.69871e-09	12.4517
ENSG00000167037	MTSS2	-1.4582	4.30942	-8.43652	5.99138e-10	5.83081e-09	12.7309
ENSG00000154188	POLQ	-0.862174	6.08011	-8.4251	6.18717e-10	6.01707e-09	12.4902
ENSG00000283486	ZNF587B	-1.10681	4.86136	-8.42193	6.24255e-10	6.0666e-09	12.6706
ENSG00000150938	PCNA	0.370208	9.11218	8.41808	6.3106e-10	6.12837e-09	11.8836
ENSG00000152763	DNA2	-0.931	5.38934	-8.40662	6.5178e-10	6.32181e-09	12.5281
ENSG00000234160	WDR5	-0.678512	6.71769	-8.40655	6.51904e-10	6.32181e-09	12.2785
ENSG00000101361	ZNF767P	-2.41387	2.89454	-8.40477	6.55183e-10	6.3491e-09	11.9506
ENSG00000263563	ARID1A	-0.864645	5.83491	-8.40393	6.5675e-10	6.35976e-09	12.4328
ENSG00000114737	UBP1	-0.589434	7.2955	-8.40171	6.60866e-10	6.39509e-09	12.1711
ENSG00000158246	NISCH	-1.20618	4.76802	-8.39997	6.64112e-10	6.42194e-09	12.6178
ENSG00000169247	PPT1	0.524564	6.91949	8.39889	6.66137e-10	6.43697e-09	12.1468
ENSG00000206262	GLUD1	0.457758	7.57479	8.39731	6.69107e-10	6.46109e-09	12.0383
ENSG00000126353	PRKAG1	0.609826	6.48833	8.39009	6.82884e-10	6.58947e-09	12.196
ENSG00000248161	GBA2	-0.806034	6.06359	-8.38691	6.89031e-10	6.64409e-09	12.3753
ENSG00000260604	NA	0.670751	6.70161	8.38158	6.99473e-10	6.74001e-09	12.1329
ENSG00000163191	FN1	-0.448812	9.12243	-8.38094	7.00732e-10	6.74739e-09	11.8259
ENSG00000287185	GRIPAP1	-0.873519	5.79474	-8.38003	7.02542e-10	6.76005e-09	12.4155
ENSG00000174748	EIF3E	0.459091	8.91753	8.37579	7.10994e-10	6.83656e-09	11.8155
ENSG00000214381	WDR27	-1.53094	4.01867	-8.37226	7.18115e-10	6.90017e-09	12.517
ENSG00000262691	LOC100288175	1.42294	3.15808	8.3711	7.20478e-10	6.918e-09	12.5478
ENSG00000247746	ZNF275	-1.09242	4.90246	-8.36725	7.28354e-10	6.97891e-09	12.5182
ENSG00000171056	JAGN1	0.594076	6.2028	8.3676	7.27634e-10	6.97891e-09	12.1897
ENSG00000183604	GLB1	0.496222	6.99611	8.36738	7.28086e-10	6.97891e-09	12.0487
ENSG00000130584	COA3	0.607175	6.55733	8.366	7.30933e-10	6.9987e-09	12.0955
ENSG00000237489	PHLDB1	-1.72925	4.06918	-8.36497	7.33054e-10	7.00939e-09	12.5172
ENSG00000128165	FAM199X	-0.69607	6.52784	-8.36496	7.33076e-10	7.00939e-09	12.2225
ENSG00000115919	GLO1	0.460621	7.80853	8.36206	7.39096e-10	7.06202e-09	11.9206
ENSG00000229593	RNF207	-1.67031	3.75784	-8.35524	7.53488e-10	7.1945e-09	12.4452
ENSG00000183283	SERPINE2	0.436198	7.802	8.35434	7.55401e-10	7.20772e-09	11.8846
ENSG00000178982	NUP98	-0.422474	8.06798	-8.35025	7.64181e-10	7.2864e-09	11.8844
ENSG00000163611	MPV17	0.683299	5.6987	8.34686	7.71538e-10	7.35142e-09	12.1983
ENSG00000241170	EIF3J	-0.622156	7.16187	-8.34182	7.82597e-10	7.45159e-09	12.0397
ENSG00000186496	TEX264	0.729685	5.82057	8.33642	7.94635e-10	7.56093e-09	12.1426
ENSG00000259562	MGAT5B	-0.859119	5.62573	-8.33313	8.02061e-10	7.62628e-09	12.2701
ENSG00000137434	CCDC25	0.615099	6.28924	8.32177	8.28256e-10	7.86987e-09	12.0457
ENSG00000230177	AHI1	-1.0481	5.19665	-8.32104	8.29966e-10	7.88064e-09	12.3367
ENSG00000049540	SS18L1	-1.69307	4.24597	-8.31823	8.366e-10	7.93811e-09	12.3765
ENSG00000123131	ALDH3B1	0.543131	7.64168	8.31367	8.4745e-10	8.03547e-09	11.7586
ENSG00000260751	NOM1	-0.879351	5.60995	-8.31198	8.51527e-10	8.06853e-09	12.2304
ENSG00000204382	AEN	-0.635725	6.9316	-8.31112	8.53594e-10	8.08251e-09	12.0025
ENSG00000010310	ASH1L	-0.793295	6.51314	-8.30801	8.61146e-10	8.14836e-09	12.0559
ENSG00000074800	UBL5	0.685056	6.81097	8.30366	8.71818e-10	8.24363e-09	11.8933
ENSG00000267216	SMAD7	-1.00738	5.19014	-8.3024	8.74937e-10	8.2674e-09	12.2913
ENSG00000240291	TRAPPC6A	0.994996	4.40883	8.30202	8.75879e-10	8.27057e-09	12.2734
ENSG00000283041	KTN1	-0.459182	8.8771	-8.29889	8.83677e-10	8.33844e-09	11.6304
ENSG00000182718	MFSD1	0.66418	6.28956	8.29537	8.92514e-10	8.41601e-09	11.9818
ENSG00000105372	CTCF	-0.543543	6.82144	-8.29494	8.93623e-10	8.42065e-09	11.9316
ENSG00000197956	STAT5B	-0.589657	6.54571	-8.29386	8.96358e-10	8.4406e-09	11.9791
ENSG00000150991	SPAG7	0.603739	6.25578	8.29175	9.01731e-10	8.48535e-09	11.9498
ENSG00000166780	DDX51	-0.923991	5.26555	-8.29064	9.0455e-10	8.50601e-09	12.235
ENSG00000076344	NA	0.86296	4.84672	8.29022	9.05645e-10	8.51044e-09	12.2113
ENSG00000103257	LMNA	0.423247	9.17483	8.28891	9.09015e-10	8.53624e-09	11.4926
ENSG00000082497	ZNF488	-1.26155	4.26631	-8.288	9.11351e-10	8.55229e-09	12.318
ENSG00000156508	TIMM17B	0.693789	5.95346	8.28492	9.19335e-10	8.62129e-09	11.9744
ENSG00000162804	CXXC5	0.782979	4.98966	8.2809	9.29876e-10	8.71416e-09	12.1284
ENSG00000164574	CLIP1	-0.64312	7.28814	-8.27544	9.44368e-10	8.84389e-09	11.8431
ENSG00000117632	RANBP2	-0.610838	7.23266	-8.27317	9.50468e-10	8.89492e-09	11.8305
ENSG00000092841	EIF6	0.499308	7.63542	8.2727	9.51746e-10	8.90078e-09	11.6717
ENSG00000197756	GLS	-0.487054	8.42873	-8.26975	9.59721e-10	8.96922e-09	11.6021
ENSG00000253200	NA	0.903816	4.74537	8.26946	9.60534e-10	8.97068e-09	12.1701
ENSG00000144821	ETHE1	0.848247	5.13252	8.2685	9.63132e-10	8.9888e-09	12.0856
ENSG00000139644	RNF40	-0.638797	6.50188	-8.26145	9.82584e-10	9.16407e-09	11.8981
ENSG00000140416	PUDP	0.653637	5.57938	8.26028	9.85852e-10	9.18828e-09	11.9578
ENSG00000228709	SMPD1	1.13254	3.93879	8.25974	9.87375e-10	9.19619e-09	12.2163
ENSG00000089157	SYF2	0.698234	5.67946	8.25922	9.88834e-10	9.20351e-09	11.9821
ENSG00000262877	SLC5A3	-1.12303	5.21893	-8.25716	9.9463e-10	9.25115e-09	12.1766
ENSG00000277639	MZF1	-1.45648	4.28636	-8.25636	9.96884e-10	9.26579e-09	12.237
ENSG00000169045	NA	0.698079	6.34382	8.25231	1.0084e-09	9.36647e-09	11.8457
ENSG00000135390	HIBADH	0.573923	6.44801	8.24615	1.02619e-09	9.52526e-09	11.7957
ENSG00000196696	SRD5A3	1.11289	4.14734	8.2454	1.02837e-09	9.53898e-09	12.1705
ENSG00000133112	NA	0.746849	5.61372	8.24509	1.02927e-09	9.54085e-09	11.9051
ENSG00000151491	NDUFAF8	0.647524	6.44958	8.24465	1.03057e-09	9.54639e-09	11.7781
ENSG00000236849	CD3EAP	-1.85975	3.57092	-8.24164	1.0394e-09	9.62166e-09	12.1033
ENSG00000182108	CHTF18	-1.18135	4.88991	-8.24088	1.04164e-09	9.6339e-09	12.1534
ENSG00000149273	ANKRD40	-0.688148	6.44236	-8.24072	1.04213e-09	9.6339e-09	11.8722
ENSG00000148344	ITGB1BP1	0.520089	7.10762	8.23978	1.0449e-09	9.65295e-09	11.6664
ENSG00000196975	CIAO2B	0.59631	6.4509	8.23891	1.04749e-09	9.67035e-09	11.7657
ENSG00000074410	CLDN12	0.756745	5.40927	8.23671	1.05406e-09	9.72444e-09	11.9719
ENSG00000235613	NBEAL2	-0.999209	5.29868	-8.2361	1.05589e-09	9.73473e-09	12.0462
ENSG00000205041	TBX3	-1.08294	5.17264	-8.23574	1.05696e-09	9.73803e-09	12.1204
ENSG00000151632	GALM	0.81139	5.14448	8.23535	1.05813e-09	9.74224e-09	11.9774
ENSG00000117394	NUP214	-0.620063	6.43068	-8.22941	1.07615e-09	9.90144e-09	11.8242
ENSG00000166441	TPRA1	0.802737	5.74594	8.22811	1.08011e-09	9.93116e-09	11.8895
ENSG00000167526	NA	0.808264	5.82867	8.2274	1.08229e-09	9.93404e-09	11.8234
ENSG00000177600	XPO5	-0.602037	6.42778	-8.22735	1.08244e-09	9.93404e-09	11.8099
ENSG00000126432	NA	0.5815	7.36959	8.2273	1.0826e-09	9.93404e-09	11.5911
ENSG00000142657	METTL23	0.739565	5.39278	8.22689	1.08385e-09	9.93884e-09	11.9251
ENSG00000166924	MUS81	-0.971821	4.94416	-8.22575	1.08739e-09	9.95785e-09	12.0931
ENSG00000254999	ANAPC16	0.529228	6.9891	8.22597	1.08669e-09	9.95785e-09	11.6436
ENSG00000147403	ZNF106	-0.798996	5.96879	-8.22529	1.08879e-09	9.96407e-09	11.9484
ENSG00000111640	FGL1	0.803745	4.92437	8.2248	1.09032e-09	9.97137e-09	11.9765
ENSG00000135404	DUSP23	0.935326	4.88211	8.22376	1.09354e-09	9.99415e-09	11.9697
ENSG00000145632	PPP1R15B	-0.624115	6.39644	-8.22104	1.10204e-09	1.0065e-08	11.8311
ENSG00000134333	FRMD4B	2.15493	2.12562	8.21949	1.10689e-09	1.00994e-08	11.8931
ENSG00000042753	TRAM1	-0.342356	10.2142	-8.21937	1.10728e-09	1.00994e-08	11.2155
ENSG00000083845	MPHOSPH10	-0.707983	6.43401	-8.21782	1.11217e-09	1.01373e-08	11.8324
ENSG00000169567	ARF6	-0.504718	7.3077	-8.2171	1.11442e-09	1.0151e-08	11.6118
ENSG00000245573	HSD17B7	1.50815	3.28186	8.21674	1.11558e-09	1.01547e-08	12.118
ENSG00000107262	HSPH1	-0.427961	9.18144	-8.21453	1.1226e-09	1.02118e-08	11.4048
ENSG00000187994	CCDC57	-1.21391	4.80407	-8.21332	1.12649e-09	1.02404e-08	12.0957
ENSG00000125868	ZYX	-0.849388	6.47887	-8.20826	1.14278e-09	1.03816e-08	11.7643
ENSG00000176340	GGH	0.495792	6.96513	8.20572	1.15107e-09	1.04499e-08	11.5982
ENSG00000136810	TMED3	0.457623	7.82361	8.20404	1.15657e-09	1.04929e-08	11.442
ENSG00000158710	PLCH1	0.784624	4.91141	8.20228	1.1624e-09	1.05388e-08	11.9199
ENSG00000135046	RBM6	-0.864464	5.85494	-8.2007	1.1676e-09	1.05789e-08	11.8963
ENSG00000198034	SNHG6	0.672537	5.74863	8.19855	1.17479e-09	1.0637e-08	11.8009
ENSG00000142541	SCAND1	0.861495	4.91618	8.19708	1.17971e-09	1.06674e-08	11.8784
ENSG00000198618	TACC3	-0.579131	6.9747	-8.19709	1.17965e-09	1.06674e-08	11.6015
ENSG00000100097	PGAM1	0.584245	6.17861	8.19646	1.18178e-09	1.0679e-08	11.681
ENSG00000177614	SHANK2	-1.20418	4.38495	-8.19538	1.18541e-09	1.07048e-08	12.0672
ENSG00000131469	USP24	-0.605868	6.61074	-8.19499	1.18672e-09	1.07095e-08	11.6989
ENSG00000256849	STK10	-0.961156	5.12632	-8.19414	1.18961e-09	1.07285e-08	11.9827
ENSG00000238165	ZSCAN29	-1.03084	4.79491	-8.19267	1.19461e-09	1.07665e-08	12.0327
ENSG00000111669	CLDN2	-0.516494	7.49951	-8.19232	1.1958e-09	1.07701e-08	11.438
ENSG00000142534	PUS7	-0.714302	6.14988	-8.18767	1.21172e-09	1.08991e-08	11.7804
ENSG00000221983	TIMELESS	-0.449223	7.61766	-8.18779	1.2113e-09	1.08991e-08	11.471
ENSG00000244313	ZC3H7B	-0.833135	6.18923	-8.18694	1.21421e-09	1.09143e-08	11.7708
ENSG00000134291	SART1	-0.718409	6.21555	-8.18232	1.2303e-09	1.10516e-08	11.7373
ENSG00000142676	DIDO1	-0.740936	6.32258	-8.18077	1.23575e-09	1.10933e-08	11.7168
ENSG00000014641	NHP2	0.557446	6.45817	8.1778	1.24622e-09	1.11799e-08	11.5843
ENSG00000135047	NA	1.06393	5.18022	8.17251	1.26514e-09	1.13422e-08	11.8083
ENSG00000254719	TMEM201	-1.6111	4.22421	-8.17075	1.2715e-09	1.13918e-08	11.9946
ENSG00000113732	SFSWAP	-0.839416	5.66902	-8.16987	1.27468e-09	1.14128e-08	11.8313
ENSG00000188643	TMCO1	0.466292	7.6436	8.16085	1.30784e-09	1.1702e-08	11.3636
ENSG00000164587	NA	1.09607	4.69876	8.16006	1.31079e-09	1.17207e-08	11.8316
ENSG00000108654	FUBP3	-0.598032	6.56636	-8.15859	1.31627e-09	1.1762e-08	11.6053
ENSG00000101439	AKT1S1	0.607185	6.5634	8.157	1.32227e-09	1.18079e-08	11.5234
ENSG00000131143	QARS	0.497144	7.43624	8.15557	1.32767e-09	1.18483e-08	11.3576
ENSG00000107581	LIF	-0.745276	6.36932	-8.15229	1.34014e-09	1.19518e-08	11.6251
ENSG00000196154	APOBEC3B	1.03557	4.24778	8.15122	1.34421e-09	1.19725e-08	11.8674
ENSG00000157168	SLC17A5	0.972545	4.47825	8.15124	1.34416e-09	1.19725e-08	11.8309
ENSG00000198931	UQCRC1	0.517202	7.42488	8.14675	1.36146e-09	1.21182e-08	11.3306
ENSG00000089154	U2SURP	-0.517179	7.86515	-8.14571	1.3655e-09	1.21463e-08	11.3481
ENSG00000112306	RGS14	1.55416	2.59095	8.13985	1.38851e-09	1.23429e-08	11.8737
ENSG00000137673	NME4	0.506738	7.26045	8.13827	1.39474e-09	1.23902e-08	11.3202
ENSG00000136942	ADNP	-0.54583	6.81786	-8.13643	1.40208e-09	1.24473e-08	11.4723
ENSG00000181019	CROCCP2	-1.35532	4.3113	-8.13551	1.40579e-09	1.24599e-08	11.9034
ENSG00000108298	MED15	-0.914962	5.62848	-8.1354	1.40623e-09	1.24599e-08	11.732
ENSG00000117450	NSRP1	-0.905398	6.00607	-8.13545	1.406e-09	1.24599e-08	11.6921
ENSG00000026025	ISG20L2	-0.749514	5.87557	-8.13408	1.41154e-09	1.24988e-08	11.6662
ENSG00000115053	ECPAS	-0.456637	7.73447	-8.13285	1.4165e-09	1.25346e-08	11.3424
ENSG00000005022	DMPK	-1.12868	4.98115	-8.1326	1.41747e-09	1.25351e-08	11.8301
ENSG00000137818	EFNA1	1.44212	3.4929	8.13178	1.42081e-09	1.25565e-08	11.8889
ENSG00000117523	RNF185	0.915942	4.88841	8.13025	1.42703e-09	1.26033e-08	11.7465
ENSG00000171858	KIF21A	-0.700248	6.45415	-8.12565	1.44587e-09	1.27614e-08	11.5966
ENSG00000106153	ABL1	-0.699292	6.41164	-8.12059	1.4669e-09	1.29387e-08	11.5298
ENSG00000172927	GSTK1	0.52056	6.97442	8.12027	1.46822e-09	1.29419e-08	11.3381
ENSG00000107745	XPR1	0.54398	6.71876	8.11957	1.47116e-09	1.29595e-08	11.3887
ENSG00000134308	FKBP3	0.578955	7.00605	8.11854	1.47551e-09	1.29894e-08	11.3334
ENSG00000138413	ZNF496	-1.01244	5.26126	-8.11786	1.47835e-09	1.30061e-08	11.7643
ENSG00000161016	CCDC84	-1.7751	3.74942	-8.11646	1.48428e-09	1.30498e-08	11.7441
ENSG00000103018	MBD1	-0.952679	5.51911	-8.11433	1.49332e-09	1.31135e-08	11.7105
ENSG00000170315	NTRK3	-0.578716	6.59699	-8.1143	1.49344e-09	1.31135e-08	11.4283
ENSG00000100316	EIF4EBP1	0.635431	6.53701	8.11317	1.49829e-09	1.31476e-08	11.4147
ENSG00000177156	RNF216	-0.744402	6.10674	-8.11066	1.50905e-09	1.32335e-08	11.5999
ENSG00000213442	NF2	-0.969289	5.40967	-8.10987	1.51244e-09	1.32547e-08	11.6752
ENSG00000168028	CEACAM19	-1.77898	4.12973	-8.10889	1.51668e-09	1.32834e-08	11.7896
ENSG00000105193	PAWR	-0.719235	6.3826	-8.10795	1.52075e-09	1.33105e-08	11.5439
ENSG00000124762	HMGA1	0.403	9.10525	8.10404	1.53784e-09	1.34514e-08	10.9815
ENSG00000141458	POLR2A	-0.550903	7.16718	-8.10059	1.55305e-09	1.35698e-08	11.3037
ENSG00000127603	EMC4	0.550113	7.18462	8.10052	1.55336e-09	1.35698e-08	11.2579
ENSG00000126267	GOT1	0.65055	6.46026	8.09773	1.56582e-09	1.36699e-08	11.3847
ENSG00000004478	FLCN	0.849778	4.76933	8.09349	1.58488e-09	1.38275e-08	11.6535
ENSG00000130402	RAN	0.313177	9.93669	8.08892	1.60572e-09	1.40003e-08	10.8337
ENSG00000102144	CD38	0.784516	4.89782	8.08832	1.60848e-09	1.40154e-08	11.5813
ENSG00000072501	ADCY6	-1.05446	5.21947	-8.08588	1.61972e-09	1.41044e-08	11.659
ENSG00000034510	GCLC	0.439389	7.3166	8.08548	1.62157e-09	1.41115e-08	11.1928
ENSG00000155368	VKORC1	0.927649	4.92444	8.08486	1.62443e-09	1.41274e-08	11.6004
ENSG00000106541	NA	-1.24999	4.60216	-8.08406	1.62813e-09	1.41506e-08	11.7377
ENSG00000120306	NDUFB3	0.743513	6.10608	8.08321	1.63213e-09	1.41763e-08	11.3934
ENSG00000107798	NRBP1	0.421401	7.93135	8.08284	1.63384e-09	1.41821e-08	11.0789
ENSG00000136205	DENND3	-0.83823	5.61576	-8.07399	1.67569e-09	1.45361e-08	11.5565
ENSG00000122705	RPS23	0.643316	8.03959	8.07011	1.6944e-09	1.46891e-08	11.0395
ENSG00000142937	SMIM6	1.0542	3.97924	8.06568	1.71599e-09	1.48668e-08	11.6602
ENSG00000035403	M6PR	0.469868	7.2378	8.06539	1.7174e-09	1.48696e-08	11.1466
ENSG00000149806	CREBRF	1.77707	2.71482	8.06406	1.72396e-09	1.49075e-08	11.6157
ENSG00000170525	NUPR1	2.34226	2.40438	8.06409	1.72379e-09	1.49075e-08	11.3306
ENSG00000204628	PGPEP1	1.15777	3.70301	8.06343	1.72706e-09	1.49249e-08	11.6764
ENSG00000110955	SENP6	-0.755079	6.00852	-8.06313	1.72853e-09	1.49281e-08	11.4742
ENSG00000213741	NPM1	0.330681	10.2626	8.06216	1.73332e-09	1.49601e-08	10.7256
ENSG00000085662	DNPH1	0.717584	5.61314	8.05941	1.74701e-09	1.50686e-08	11.3969
ENSG00000117448	AP3D1	-0.62211	6.97757	-8.05795	1.75431e-09	1.51221e-08	11.2408
ENSG00000164823	WDR48	0.67034	6.05056	8.05667	1.76075e-09	1.5168e-08	11.3391
ENSG00000134107	PNPT1	-0.746389	6.63298	-8.05554	1.76647e-09	1.52077e-08	11.3047
ENSG00000253676	GAL3ST1	0.950667	4.29537	8.05523	1.76801e-09	1.52114e-08	11.5458
ENSG00000110700	NOP16	-0.606152	6.14117	-8.05104	1.78935e-09	1.53852e-08	11.3578
ENSG00000063177	CHAF1A	-0.997261	5.32947	-8.04958	1.79683e-09	1.54399e-08	11.5676
ENSG00000198755	PPA2	0.584466	6.70618	8.04395	1.82603e-09	1.56809e-08	11.1682
ENSG00000135940	GIGYF1	-0.869634	5.54039	-8.0427	1.83257e-09	1.57271e-08	11.4898
ENSG00000157557	GNA13	0.492746	7.25541	8.04092	1.84193e-09	1.57975e-08	11.0827
ENSG00000138085	NCBP3	-0.648034	6.4904	-8.03948	1.84954e-09	1.5843e-08	11.2976
ENSG00000133131	TBC1D8	0.607421	5.89479	8.03961	1.84888e-09	1.5843e-08	11.2946
ENSG00000100345	RPA3	0.620045	6.24122	8.03635	1.8662e-09	1.59756e-08	11.2202
ENSG00000129824	IFITM3	1.00754	4.44343	8.03118	1.89402e-09	1.62036e-08	11.5132
ENSG00000114942	PKP2	-1.22888	4.1758	-8.02966	1.90228e-09	1.6264e-08	11.6009
ENSG00000225178	EVPL	-0.981877	4.9867	-8.02761	1.91349e-09	1.63497e-08	11.5277
ENSG00000174444	VPS35	0.400229	8.38659	8.02342	1.93659e-09	1.65367e-08	10.8659
ENSG00000140264	SC5D	0.934653	4.93016	8.02278	1.94016e-09	1.65568e-08	11.418
ENSG00000155506	AGAP3	-0.783236	5.57954	-8.0214	1.94784e-09	1.6612e-08	11.3887
ENSG00000164111	ZNF445	-1.24586	4.39847	-8.01623	1.97692e-09	1.68495e-08	11.5674
ENSG00000104763	LTB4R	-2.30579	3.28818	-8.01197	2.00115e-09	1.70453e-08	11.2265
ENSG00000108219	METTL27	1.66108	2.93326	8.01127	2.00519e-09	1.70692e-08	11.5459
ENSG00000179918	PRPF3	-0.640544	6.54897	-8.00584	2.03665e-09	1.73261e-08	11.1787
ENSG00000176485	NA	0.609013	6.79861	8.00153	2.06194e-09	1.75303e-08	11.0417
ENSG00000067560	ROR1	-0.92029	5.52673	-7.99848	2.08008e-09	1.76735e-08	11.3687
ENSG00000105677	ZNF385A	1.36613	3.58106	7.99609	2.09439e-09	1.77841e-08	11.5151
ENSG00000075415	MYSM1	-1.08279	5.24256	-7.99194	2.11947e-09	1.79858e-08	11.4391
ENSG00000100292	MXD3	0.808815	4.65511	7.99162	2.12138e-09	1.79909e-08	11.3006
ENSG00000127483	RNPS1	-0.559353	7.0941	-7.99107	2.12472e-09	1.8008e-08	11.019
ENSG00000127184	RIC8A	-0.520656	7.1301	-7.99063	2.12741e-09	1.80197e-08	10.9934
ENSG00000170027	UROD	0.684145	5.55222	7.98588	2.15661e-09	1.82557e-08	11.1996
ENSG00000179604	TEAD4	-1.13323	4.61506	-7.98475	2.1636e-09	1.83035e-08	11.4594
ENSG00000084207	FGF2	-0.720446	6.5038	-7.9839	2.16891e-09	1.8337e-08	11.1677
ENSG00000172757	ZDHHC8	-1.45399	4.03659	-7.9825	2.17759e-09	1.83804e-08	11.4777
ENSG00000091136	BYSL	-0.888182	5.57022	-7.98268	2.17652e-09	1.83804e-08	11.3076
ENSG00000145741	IMPDH2	0.401941	7.98261	7.98243	2.17808e-09	1.83804e-08	10.7789
ENSG00000183853	SUB1	0.507552	7.86498	7.98195	2.18108e-09	1.83943e-08	10.8123
ENSG00000144713	PHF12	-0.74791	5.59891	-7.97819	2.2047e-09	1.85821e-08	11.2584
ENSG00000152952	TET3	-1.07418	4.93257	-7.97781	2.20712e-09	1.85886e-08	11.4144
ENSG00000133872	IST1	0.450793	7.56725	7.97764	2.2082e-09	1.85886e-08	10.8464
ENSG00000143947	POP4	0.493332	7.0829	7.9765	2.21543e-09	1.8638e-08	10.9067
ENSG00000143198	KIAA1217	1.06931	4.45145	7.9711	2.25006e-09	1.89177e-08	11.404
ENSG00000107438	FAM122B	-0.753004	5.96379	-7.97014	2.25624e-09	1.8958e-08	11.1898
ENSG00000161547	NA	-0.633995	6.65391	-7.96865	2.2659e-09	1.90274e-08	11.0621
ENSG00000227008	UBE2L3	0.517661	7.21833	7.96537	2.28733e-09	1.91956e-08	10.8577
ENSG00000163811	POLG	-0.792326	6.17071	-7.96502	2.28963e-09	1.92031e-08	11.1401
ENSG00000148303	ACAA2	0.583242	6.02671	7.95984	2.324e-09	1.94794e-08	11.0461
ENSG00000118257	PMVK	0.671108	5.5914	7.95811	2.33551e-09	1.95639e-08	11.1154
ENSG00000159377	NA	0.750762	5.70482	7.95731	2.34094e-09	1.95973e-08	11.0801
ENSG00000080608	STT3A	0.410348	7.8172	7.95346	2.36698e-09	1.98031e-08	10.7266
ENSG00000124193	NA	0.713103	7.49148	7.94759	2.40719e-09	2.01273e-08	10.7632
ENSG00000205542	SCAF4	-0.937418	5.09887	-7.9458	2.4196e-09	2.02186e-08	11.2862
ENSG00000163479	ATF6	0.515833	6.48612	7.9394	2.46454e-09	2.05816e-08	10.9247
ENSG00000152234	FANCA	-0.796296	5.76812	-7.9381	2.47372e-09	2.06393e-08	11.1512
ENSG00000188015	SDR16C5	3.5143	1.00892	7.938	2.47448e-09	2.06393e-08	10.2739
ENSG00000188554	HUWE1	-0.527315	8.53432	-7.93746	2.4783e-09	2.06585e-08	10.6472
ENSG00000138029	INCENP	-0.669224	6.23672	-7.93537	2.4932e-09	2.07701e-08	10.9924
ENSG00000084754	DUSP3	0.433545	7.54594	7.92592	2.56191e-09	2.13295e-08	10.678
ENSG00000111229	DMAC2	0.527188	7.16552	7.92355	2.57943e-09	2.14623e-08	10.7437
ENSG00000100129	FADS1	0.331208	8.89933	7.91915	2.61227e-09	2.17222e-08	10.4843
ENSG00000074319	SLC5A6	-0.632041	6.36422	-7.91503	2.64343e-09	2.1968e-08	10.9283
ENSG00000109919	SAMD4A	-1.19151	4.53289	-7.9131	2.65812e-09	2.20766e-08	11.2775
ENSG00000141552	GTF3C6	0.72704	6.40654	7.91276	2.66069e-09	2.20846e-08	10.8293
ENSG00000144746	DDB2	0.561264	6.74139	7.91247	2.66293e-09	2.20897e-08	10.7702
ENSG00000177469	NDUFB1	0.723058	6.47868	7.90742	2.70195e-09	2.23998e-08	10.8181
ENSG00000103363	CHD7	-1.48301	4.24773	-7.90541	2.71762e-09	2.2516e-08	11.2637
ENSG00000102007	SHISA5	0.487824	6.88135	7.90222	2.74267e-09	2.27098e-08	10.7013
ENSG00000147454	CDK5RAP3	-2.63475	3.55107	-7.90138	2.74934e-09	2.27512e-08	10.9174
ENSG00000086548	EIF4B	0.382739	8.50345	7.89722	2.78239e-09	2.30108e-08	10.4796
ENSG00000114867	CYB5A	0.555003	6.0785	7.89614	2.79109e-09	2.30687e-08	10.8353
ENSG00000092820	ENTR1	-0.668097	6.32417	-7.89321	2.8147e-09	2.32498e-08	10.8772
ENSG00000148834	HAUS5	-0.862723	5.12896	-7.89181	2.82608e-09	2.33297e-08	11.1194
ENSG00000164733	CDC25C	0.747772	5.02063	7.88256	2.90238e-09	2.39167e-08	10.9798
ENSG00000175334	EHMT1	-0.744274	6.05095	-7.8827	2.90122e-09	2.39167e-08	10.9134
ENSG00000109854	UQCR10	0.760593	5.58019	7.88235	2.9042e-09	2.39167e-08	10.8823
ENSG00000108518	PRRC2B	-0.772602	6.83705	-7.88252	2.90274e-09	2.39167e-08	10.7817
ENSG00000111481	RNPEP	0.469591	6.9398	7.87082	3.00224e-09	2.47092e-08	10.6279
ENSG00000148396	ECT2	-0.40015	8.46233	-7.8684	3.02327e-09	2.48673e-08	10.4099
ENSG00000147684	NA	0.683517	8.75382	7.86362	3.06522e-09	2.51972e-08	10.3445
ENSG00000197958	BRPF1	-1.26827	4.76813	-7.86203	3.07928e-09	2.52823e-08	11.1233
ENSG00000075223	MAT2B	0.553147	6.52973	7.86215	3.07826e-09	2.52823e-08	10.6834
ENSG00000185825	GIGYF2	-0.621061	6.35516	-7.85636	3.13007e-09	2.56839e-08	10.7697
ENSG00000102265	SAP18	0.534827	7.09444	7.85599	3.1334e-09	2.56958e-08	10.5658
ENSG00000185043	LSM3	0.662879	6.87604	7.8547	3.14506e-09	2.57759e-08	10.584
ENSG00000088832	GTF3C4	-0.660723	6.66236	-7.85424	3.14925e-09	2.57947e-08	10.7203
ENSG00000165671	CKS2	0.512679	8.17877	7.8503	3.18526e-09	2.60741e-08	10.381
ENSG00000160208	PAFAH1B3	0.695626	6.29612	7.84923	3.19505e-09	2.61385e-08	10.6537
ENSG00000068654	CHD8	-0.602971	6.67655	-7.84636	3.22165e-09	2.63404e-08	10.6961
ENSG00000143612	PURB	-0.906604	5.31007	-7.84582	3.22661e-09	2.63651e-08	10.9704
ENSG00000145901	ITGAX	2.07783	2.27652	7.84455	3.23851e-09	2.64465e-08	10.9225
ENSG00000154380	KANK2	-0.715819	5.51233	-7.84349	3.24842e-09	2.65116e-08	10.8511
ENSG00000181555	CHMP2B	0.479932	7.16557	7.83901	3.29068e-09	2.68405e-08	10.511
ENSG00000090487	COMMD9	0.645807	5.50217	7.83312	3.34705e-09	2.7284e-08	10.7795
ENSG00000132471	BMS1	-0.517317	7.18987	-7.82851	3.39185e-09	2.76327e-08	10.5393
ENSG00000009954	WIPI1	1.24858	3.54804	7.82563	3.42026e-09	2.78475e-08	11.0386
ENSG00000173113	CCDC90B	0.642519	5.98129	7.8248	3.42839e-09	2.7897e-08	10.7049
ENSG00000131475	MORC2	-0.940437	5.11074	-7.82265	3.44974e-09	2.80541e-08	10.9391
ENSG00000129562	NA	0.570179	7.02377	7.81988	3.47748e-09	2.82628e-08	10.4713
ENSG00000006327	ENSA	0.451829	7.42508	7.81671	3.50946e-09	2.85057e-08	10.3927
ENSG00000167601	DHX30	-0.595895	6.5094	-7.81588	3.51787e-09	2.85571e-08	10.6196
ENSG00000189043	NUP210	-0.651375	7.41883	-7.81193	3.55821e-09	2.88674e-08	10.4346
ENSG00000142168	NA	-1.56586	3.78133	-7.80516	3.62849e-09	2.942e-08	10.969
ENSG00000165678	CYB561D2	0.766007	4.72561	7.80207	3.66107e-09	2.96501e-08	10.8135
ENSG00000108424	GPN1	0.557574	6.34018	7.80205	3.66121e-09	2.96501e-08	10.5672
ENSG00000115944	ATP6V0A2	-0.757797	5.69964	-7.79888	3.695e-09	2.9906e-08	10.7619
ENSG00000139289	SLC20A1	0.454592	7.07675	7.79603	3.72545e-09	3.01347e-08	10.391
ENSG00000140612	BOP1	-0.61111	7.0011	-7.79481	3.73865e-09	3.02235e-08	10.44
ENSG00000100804	NOL8	-0.646574	6.21317	-7.79201	3.76905e-09	3.04513e-08	10.6298
ENSG00000128524	ATP2B4	0.694055	5.69715	7.7884	3.80855e-09	3.07522e-08	10.6457
ENSG00000126756	ADAR	-0.371523	8.50815	-7.78208	3.87885e-09	3.13013e-08	10.1682
ENSG00000077782	DDX27	-0.546103	6.94546	-7.78056	3.89595e-09	3.14207e-08	10.4675
ENSG00000145247	PIGV	0.950156	3.8426	7.77863	3.91769e-09	3.15774e-08	10.8394
ENSG00000136156	ISCA2	0.649933	5.4254	7.77758	3.92967e-09	3.16553e-08	10.6264
ENSG00000041353	E2F8	-1.08397	4.26959	-7.77363	3.97474e-09	3.19995e-08	10.8731
ENSG00000126247	MRPL54	0.784295	5.084	7.77271	3.98539e-09	3.20663e-08	10.6778
ENSG00000144674	ZNF655	-0.549557	6.64013	-7.77025	4.01383e-09	3.22761e-08	10.4523
ENSG00000116133	PEPD	0.560041	6.932	7.76485	4.077e-09	3.27648e-08	10.3088
ENSG00000141027	PDHA1	0.465577	7.57193	7.76441	4.08223e-09	3.27875e-08	10.2175
ENSG00000010278	KIF20B	-0.619746	6.97073	-7.7628	4.1013e-09	3.29213e-08	10.3774
ENSG00000129255	UHRF2	-0.556817	6.60647	-7.76059	4.12758e-09	3.31128e-08	10.4635
ENSG00000100300	DTYMK	0.554259	7.1248	7.76035	4.13051e-09	3.31168e-08	10.2561
ENSG00000099968	ADK	0.563578	6.28646	7.759	4.14658e-09	3.32262e-08	10.4328
ENSG00000173812	DENND5B	-0.755967	5.73802	-7.75878	4.14925e-09	3.3228e-08	10.6162
ENSG00000125743	KMT2A	-0.830705	5.5085	-7.75652	4.17657e-09	3.34272e-08	10.69
ENSG00000196262	USP7	-0.424553	7.7177	-7.74815	4.27899e-09	3.42269e-08	10.2069
ENSG00000135446	APH1A	0.467635	7.33025	7.74714	4.29151e-09	3.4307e-08	10.1936
ENSG00000147400	C15orf48	1.29794	3.2798	7.74259	4.34834e-09	3.47409e-08	10.8064
ENSG00000008988	CZIB	0.774408	5.20151	7.74203	4.35542e-09	3.47771e-08	10.5704
ENSG00000180879	TMEM120A	0.75754	5.01126	7.73894	4.39456e-09	3.50692e-08	10.5929
ENSG00000042493	TGFB2	-0.641189	5.9061	-7.7336	4.46308e-09	3.55951e-08	10.4651
ENSG00000103381	AKAP1	-0.562518	6.47793	-7.73189	4.48525e-09	3.57511e-08	10.3522
ENSG00000165092	PRAG1	-0.836008	5.71084	-7.72916	4.52083e-09	3.60137e-08	10.5198
ENSG00000109685	NDUFAF3	0.700273	5.51927	7.72666	4.55379e-09	3.6255e-08	10.4531
ENSG00000141504	NA	0.808277	5.04063	7.72579	4.56525e-09	3.63251e-08	10.5695
ENSG00000157106	RCC2	-0.517047	6.88731	-7.72517	4.57348e-09	3.63694e-08	10.2661
ENSG00000141934	MAFK	-1.07535	5.72557	-7.7249	4.57699e-09	3.63762e-08	10.5821
ENSG00000071082	PDE1C	-0.923808	5.40794	-7.72261	4.60758e-09	3.65767e-08	10.5621
ENSG00000052749	CTSC	0.536919	6.71318	7.72276	4.60546e-09	3.65767e-08	10.2404
ENSG00000197971	RPS15A	0.627482	6.53572	7.72211	4.61421e-09	3.6608e-08	10.2678
ENSG00000087087	SLC22A23	1.15295	3.93446	7.71493	4.71129e-09	3.73565e-08	10.7068
ENSG00000145592	CDK13	-0.694477	5.86854	-7.7141	4.72254e-09	3.7424e-08	10.4529
ENSG00000104823	PLEC	-0.641574	9.66808	-7.71365	4.72872e-09	3.74512e-08	9.81976
ENSG00000106803	LXN	1.0241	4.51803	7.71198	4.75171e-09	3.76115e-08	10.6103
ENSG00000175061	CIAO2A	0.544913	6.77049	7.71178	4.75449e-09	3.76117e-08	10.1867
ENSG00000111843	CDK10	-0.934006	5.07541	-7.70836	4.80178e-09	3.79638e-08	10.5791
ENSG00000068697	IRF2	0.998256	4.25802	7.70794	4.8077e-09	3.79886e-08	10.6298
ENSG00000213553	MORF4L1	0.357486	8.63314	7.70715	4.81875e-09	3.80539e-08	9.90508
ENSG00000113810	NOC3L	-0.771914	6.25814	-7.70627	4.83106e-09	3.8129e-08	10.3915
ENSG00000164919	SLC6A6	0.458842	7.78628	7.70578	4.83794e-09	3.81613e-08	10.0043
ENSG00000138829	ARHGEF11	-0.785681	5.81468	-7.70541	4.84309e-09	3.81799e-08	10.4665
ENSG00000163171	TPM3	0.336799	9.44978	7.69372	5.01018e-09	3.94744e-08	9.76297
ENSG00000018408	NA	0.669124	5.83112	7.69014	5.0625e-09	3.98533e-08	10.3167
ENSG00000185088	VDAC2	0.46653	7.68753	7.69003	5.06412e-09	3.98533e-08	9.99206
ENSG00000231991	SMC5	-0.787123	5.96804	-7.68846	5.08724e-09	4.00122e-08	10.3943
ENSG00000013364	STX16	-0.741877	5.76559	-7.68719	5.10601e-09	4.01367e-08	10.4319
ENSG00000120509	TUFT1	-0.952862	5.22061	-7.68361	5.15924e-09	4.05318e-08	10.5532
ENSG00000171863	AKR1B15	1.08665	6.22598	7.68141	5.19236e-09	4.07686e-08	10.225
ENSG00000167085	SYS1	0.674117	5.51704	7.68098	5.19887e-09	4.07962e-08	10.3156
ENSG00000166681	NA	0.733771	5.39586	7.6803	5.20917e-09	4.08536e-08	10.3604
ENSG00000136450	CASP8AP2	-1.06787	4.95608	-7.68006	5.21277e-09	4.08583e-08	10.5627
ENSG00000142507	FDXR	0.749292	5.96661	7.67729	5.25485e-09	4.11645e-08	10.263
ENSG00000137154	LTO1	-1.03765	5.04589	-7.67488	5.29176e-09	4.14298e-08	10.5313
ENSG00000111775	NA	0.791777	5.08282	7.67441	5.2989e-09	4.1462e-08	10.3967
ENSG00000197746	ABRACL	0.804376	4.82123	7.67203	5.33576e-09	4.17265e-08	10.4336
ENSG00000167863	GATAD2A	-0.827938	5.53692	-7.67105	5.35093e-09	4.17973e-08	10.4127
ENSG00000183726	G6PC3	0.557325	6.93833	7.67109	5.3502e-09	4.17973e-08	10.0392
ENSG00000106853	RPS27	0.981803	6.29263	7.67018	5.36449e-09	4.18792e-08	10.1421
ENSG00000131669	SFXN1	-0.474933	7.14978	-7.66702	5.41389e-09	4.22407e-08	10.0506
ENSG00000149480	QTRT2	-0.657319	6.21358	-7.66665	5.41969e-09	4.22618e-08	10.2618
ENSG00000133657	TRIB1	0.590941	5.74754	7.66575	5.43388e-09	4.23483e-08	10.2389
ENSG00000136811	VPS35L	0.519677	6.70366	7.66362	5.46761e-09	4.25869e-08	10.0721
ENSG00000196419	WAPL	-0.605248	6.37161	-7.66274	5.48159e-09	4.26714e-08	10.2466
ENSG00000159720	NAMPT	0.429675	7.70802	7.6613	5.50455e-09	4.28257e-08	9.90792
ENSG00000170540	B3GNT7	2.70427	0.878884	7.66083	5.51218e-09	4.28607e-08	9.7066
ENSG00000168137	METTL16	-0.581384	6.58352	-7.66049	5.5175e-09	4.28776e-08	10.1717
ENSG00000089280	CLEC2B	2.5763	1.13156	7.65718	5.57079e-09	4.32671e-08	9.98619
ENSG00000147416	THSD4	-0.574313	6.54018	-7.65651	5.5817e-09	4.33272e-08	10.1438
ENSG00000130255	NPBWR1	1.576	2.88824	7.65576	5.59384e-09	4.33968e-08	10.5621
ENSG00000111639	EXT2	0.421351	7.36801	7.6523	5.65042e-09	4.38108e-08	9.91986
ENSG00000103855	SPIN3	-1.01101	4.66969	-7.65109	5.67035e-09	4.39404e-08	10.4997
ENSG00000146648	TFAP2C	-1.08349	4.36198	-7.64588	5.75679e-09	4.45849e-08	10.5147
ENSG00000117410	NECTIN3	-0.63814	6.01238	-7.64482	5.77464e-09	4.46978e-08	10.2114
ENSG00000060237	SNRPE	0.503316	7.03096	7.64134	5.83336e-09	4.51267e-08	9.95619
ENSG00000108592	PSMC3	0.413474	8.05854	7.64038	5.84967e-09	4.52273e-08	9.7924
ENSG00000116209	MXRA7	0.596713	5.77615	7.63944	5.86553e-09	4.53243e-08	10.1608
ENSG00000131711	NDUFC1	0.753124	5.68415	7.63545	5.93406e-09	4.58279e-08	10.1749
ENSG00000130726	SDHB	0.490697	6.88478	7.63386	5.96153e-09	4.6014e-08	9.952
ENSG00000167258	PTPN14	-0.922233	5.44121	-7.63313	5.97425e-09	4.60861e-08	10.3376
ENSG00000232573	RAB29	0.839615	4.64785	7.63235	5.98771e-09	4.61639e-08	10.3655
ENSG00000089289	RBX1	0.663747	6.16264	7.63143	6.00377e-09	4.62616e-08	10.0532
ENSG00000109475	DCAF12	0.513888	6.71975	7.6311	6.00954e-09	4.62799e-08	9.99128
ENSG00000159199	AMD1	-0.430695	7.72789	-7.62977	6.03278e-09	4.64327e-08	9.8123
ENSG00000145555	XPOT	-0.413265	8.00071	-7.62856	6.05406e-09	4.65702e-08	9.83529
ENSG00000196715	AKAP8	-0.905724	5.21251	-7.62492	6.11853e-09	4.70396e-08	10.325
ENSG00000160752	SLC2A12	3.67964	0.38205	7.62317	6.14987e-09	4.7254e-08	9.23104
ENSG00000213939	RNF14	0.565219	6.47452	7.61498	6.29807e-09	4.83655e-08	9.99112
ENSG00000198952	NAT9	-0.790956	5.6174	-7.61332	6.32853e-09	4.85721e-08	10.242
ENSG00000172809	ATXN2	-0.916885	5.14327	-7.61294	6.33553e-09	4.85985e-08	10.3255
ENSG00000132361	AURKAIP1	0.515211	6.69065	7.6112	6.36768e-09	4.87903e-08	9.90231
ENSG00000089248	CDKN3	0.559421	6.88884	7.61127	6.36652e-09	4.87903e-08	9.87038
ENSG00000116288	THNSL1	1.01864	4.10556	7.60564	6.47166e-09	4.95592e-08	10.3412
ENSG00000182944	DCTN2	0.423845	7.50731	7.603	6.52153e-09	4.99131e-08	9.76456
ENSG00000182704	RHOT2	-0.644327	6.05432	-7.5936	6.70251e-09	5.12695e-08	10.0496
ENSG00000149257	NA	0.820262	4.52094	7.59244	6.72511e-09	5.14136e-08	10.2474
ENSG00000160633	ZNF207	-0.395257	8.18924	-7.59185	6.73669e-09	5.14733e-08	9.66236
ENSG00000114480	TRMU	-0.825598	5.564	-7.58464	6.87966e-09	5.25363e-08	10.1331
ENSG00000037474	GRHPR	0.450702	7.38161	7.58413	6.88991e-09	5.25852e-08	9.7252
ENSG00000239672	TUG1	-0.570899	6.93577	-7.57166	7.14488e-09	5.45007e-08	9.8356
ENSG00000056097	LOC388282	-1.20586	3.8494	-7.56986	7.18249e-09	5.4757e-08	10.322
ENSG00000115268	SSBP1	0.544491	7.09928	7.56777	7.22634e-09	5.50605e-08	9.72485
ENSG00000123349	RPS25	0.62884	7.95378	7.56665	7.25001e-09	5.52101e-08	9.58745
ENSG00000182117	RBM19	-0.855267	5.10435	-7.56345	7.31782e-09	5.56954e-08	10.1897
ENSG00000106605	SMARCC1	-0.545141	6.67344	-7.56083	7.37395e-09	5.60914e-08	9.84133
ENSG00000115828	VPS26C	0.702729	5.23415	7.56055	7.38013e-09	5.61071e-08	10.0379
ENSG00000213614	AKR7A2	0.683209	5.37209	7.55953	7.40199e-09	5.62375e-08	9.98576
ENSG00000100997	CELF1	-0.538125	7.0894	-7.55937	7.40553e-09	5.62375e-08	9.77622
ENSG00000140988	PJA2	0.566223	6.33134	7.55904	7.41253e-09	5.62594e-08	9.82873
ENSG00000140365	EEA1	-0.963784	5.03225	-7.55379	7.52689e-09	5.70957e-08	10.176
ENSG00000198231	ASAP2	-0.905635	5.12454	-7.55249	7.55564e-09	5.72819e-08	10.1714
ENSG00000130066	NA	1.03714	4.32657	7.55099	7.58866e-09	5.75003e-08	10.1467
ENSG00000125877	DCTN5	0.441319	7.06355	7.5497	7.61729e-09	5.76853e-08	9.67771
ENSG00000123240	COMMD6	0.598785	5.89069	7.54926	7.62703e-09	5.7727e-08	9.87861
ENSG00000115875	NA	0.811979	5.79542	7.54731	7.6706e-09	5.80246e-08	9.89626
ENSG00000182481	CPLX2	-0.367397	9.25527	-7.53926	7.85293e-09	5.93709e-08	9.32195
ENSG00000008018	NA	2.41857	0.561852	7.53734	7.89685e-09	5.96699e-08	9.55156
ENSG00000055483	MFF	0.497606	6.74974	7.53399	7.97464e-09	6.02244e-08	9.68973
ENSG00000011422	MAP4	-0.424378	8.06108	-7.53302	7.99716e-09	6.03611e-08	9.51102
ENSG00000256745	EIF3F	0.569499	6.84521	7.52953	8.0791e-09	6.09459e-08	9.66933
ENSG00000149532	PEF1	0.54237	6.31609	7.52817	8.11112e-09	6.11536e-08	9.72636
ENSG00000186566	DHRS9	3.08544	0.871027	7.52645	8.15193e-09	6.14274e-08	9.57352
ENSG00000172301	TM4SF4	0.472541	6.90737	7.52598	8.16325e-09	6.14788e-08	9.59696
ENSG00000163938	NA	-2.22197	2.71824	-7.52163	8.26741e-09	6.22289e-08	9.77014
ENSG00000089220	TMEM179B	0.81386	4.8403	7.52143	8.2724e-09	6.22321e-08	9.986
ENSG00000117859	PRDX3	0.363167	9.06437	7.52094	8.28408e-09	6.22857e-08	9.29722
ENSG00000173457	BPTF	-0.590086	6.53017	-7.52065	8.2913e-09	6.23057e-08	9.76491
ENSG00000104312	MAPRE2	0.697429	5.49023	7.51425	8.4475e-09	6.34445e-08	9.88009
ENSG00000131174	UQCC2	0.630665	5.81297	7.50969	8.56085e-09	6.42605e-08	9.77212
ENSG00000127884	DDIAS	-0.725667	5.91559	-7.50856	8.58923e-09	6.44381e-08	9.87903
ENSG00000054148	ZDHHC24	0.774725	4.91879	7.50825	8.59704e-09	6.44613e-08	9.92034
ENSG00000092010	ATOX1	0.719023	5.87337	7.50707	8.62654e-09	6.4647e-08	9.7556
ENSG00000185298	BAD	0.75797	5.22426	7.50549	8.66641e-09	6.49101e-08	9.8597
ENSG00000080189	GFPT2	0.604629	6.31083	7.50449	8.69187e-09	6.50652e-08	9.68808
ENSG00000176619	CTIF	-1.57352	3.99317	-7.50152	8.76764e-09	6.55605e-08	10.1298
ENSG00000253729	MYCBP2	-0.778129	5.3941	-7.50154	8.76717e-09	6.55605e-08	9.94705
ENSG00000163041	STMP1	0.65814	5.9622	7.50131	8.77306e-09	6.55651e-08	9.73917
ENSG00000038219	RETREG2	0.567022	6.25087	7.50053	8.79301e-09	6.56782e-08	9.66717
ENSG00000136930	RHNO1	0.531834	6.31705	7.4997	8.81433e-09	6.58015e-08	9.65071
ENSG00000119596	PDE6D	0.77881	4.84992	7.49841	8.84777e-09	6.59579e-08	9.933
ENSG00000164300	TOP3A	-0.663129	6.19401	-7.49833	8.84978e-09	6.59579e-08	9.779
ENSG00000102316	PGRMC1	0.431606	7.84383	7.49841	8.84765e-09	6.59579e-08	9.40071
ENSG00000153187	EIF4G3	-0.588482	6.308	-7.49654	8.89615e-09	6.62673e-08	9.73427
ENSG00000129250	TCEAL1	0.849669	4.53105	7.48861	9.10464e-09	6.77834e-08	9.9497
ENSG00000164120	YIF1A	0.609338	6.64808	7.48667	9.15658e-09	6.81329e-08	9.55351
ENSG00000008394	S100A13	0.69578	5.44495	7.48582	9.17926e-09	6.82645e-08	9.77707
ENSG00000112739	ATP5ME	0.824312	5.6494	7.48535	9.19183e-09	6.83208e-08	9.7427
ENSG00000087302	G2E3	-0.624255	6.02278	-7.48318	9.25033e-09	6.86808e-08	9.74307
ENSG00000166228	CIP2A	-0.559326	6.73366	-7.48334	9.24617e-09	6.86808e-08	9.60339
ENSG00000164405	PKIB	1.61989	2.52512	7.48298	9.25579e-09	6.8684e-08	10.0431
ENSG00000154277	TRIM25	-0.523975	6.93522	-7.48165	9.29185e-09	6.89142e-08	9.55301
ENSG00000196526	EHBP1L1	-0.697325	6.03274	-7.47776	9.39821e-09	6.96651e-08	9.71185
ENSG00000030582	BLOC1S1	1.00781	4.11805	7.47574	9.45371e-09	7.00385e-08	9.97336
ENSG00000125995	ITM2C	0.526478	6.36812	7.47415	9.49782e-09	7.03271e-08	9.57591
ENSG00000013588	OARD1	0.730384	5.33233	7.46766	9.67976e-09	7.15966e-08	9.73569
ENSG00000154518	VPS29	0.557271	7.27594	7.46776	9.67707e-09	7.15966e-08	9.40942
ENSG00000180891	CD59	0.409009	7.89296	7.46729	9.69046e-09	7.1637e-08	9.28852
ENSG00000116754	PLEKHA7	-0.993292	4.70324	-7.46586	9.73091e-09	7.18971e-08	9.95831
ENSG00000169692	ATG10	1.0064	4.01886	7.46322	9.80637e-09	7.23763e-08	9.96985
ENSG00000116062	MAP3K21	-0.895221	5.54353	-7.46336	9.80246e-09	7.23763e-08	9.78769
ENSG00000166900	C12orf75	0.404137	8.11306	7.46284	9.8173e-09	7.24178e-08	9.24951
ENSG00000004779	EDF1	0.420809	7.9821	7.46096	9.87135e-09	7.27772e-08	9.26983
ENSG00000125356	BPNT1	0.785169	4.7189	7.46064	9.88066e-09	7.28066e-08	9.83829
ENSG00000125991	ASB9	0.700642	4.94929	7.45627	1.0008e-08	7.37052e-08	9.74873
ENSG00000178741	SIM2	-1.4904	3.85764	-7.4551	1.00422e-08	7.39174e-08	9.99416
ENSG00000131100	DZIP1	-0.972352	4.82836	-7.45217	1.01287e-08	7.45139e-08	9.92323
ENSG00000111540	PSMB3	0.638893	6.88256	7.44963	1.02044e-08	7.50302e-08	9.41402
ENSG00000187498	SNRPF	0.565098	7.17442	7.44934	1.0213e-08	7.50528e-08	9.35296
ENSG00000117592	DGCR6L	0.802949	4.75097	7.44838	1.02417e-08	7.5223e-08	9.80007
ENSG00000113649	PPP1R12A	-0.680211	6.30876	-7.4465	1.02981e-08	7.55969e-08	9.60708
ENSG00000123416	ACSM3	1.42824	2.92525	7.44594	1.0315e-08	7.56803e-08	9.96962
ENSG00000130520	DHRS7B	0.841162	4.70037	7.44476	1.03508e-08	7.59022e-08	9.8055
ENSG00000242265	NUMA1	-0.651762	6.40124	-7.44347	1.039e-08	7.61484e-08	9.55937
ENSG00000228474	CHCHD1	0.562623	6.37573	7.44235	1.04242e-08	7.63582e-08	9.46978
ENSG00000196230	TTC14	-0.855311	5.02207	-7.43517	1.06456e-08	7.79386e-08	9.80564
ENSG00000243964	LARP4	-0.539362	7.04438	-7.43399	1.06825e-08	7.81667e-08	9.45581
ENSG00000108107	CCDC85C	-1.04987	5.37002	-7.43147	1.07615e-08	7.87026e-08	9.73325
ENSG00000122406	PTAR1	-0.791962	6.018	-7.4311	1.07732e-08	7.87462e-08	9.63316
ENSG00000055044	KRT16	1.69655	2.71266	7.42796	1.08727e-08	7.94308e-08	9.83228
ENSG00000114391	SRSF4	-0.566204	6.1482	-7.42462	1.09797e-08	8.01696e-08	9.55632
ENSG00000182899	SCPEP1	0.583121	5.95682	7.42383	1.1005e-08	8.03114e-08	9.53363
ENSG00000173660	FJX1	-0.987615	4.7624	-7.42221	1.10574e-08	8.06326e-08	9.78532
ENSG00000084652	MUC5B	-0.802619	6.23343	-7.4221	1.10608e-08	8.06326e-08	9.53402
ENSG00000155097	RRP1	-0.791368	5.61054	-7.42142	1.10829e-08	8.07501e-08	9.67019
ENSG00000130724	HMG20B	0.640839	5.53246	7.4198	1.11357e-08	8.10913e-08	9.54112
ENSG00000170043	UNC13D	-0.763856	5.65242	-7.41656	1.12421e-08	8.18232e-08	9.59699
ENSG00000169021	ADAMTS10	-1.1052	4.77617	-7.41525	1.12853e-08	8.20934e-08	9.78227
ENSG00000129235	PDS5B	-0.784971	5.31785	-7.41034	1.14487e-08	8.32379e-08	9.69493
ENSG00000130826	WWC2	-0.806731	5.5774	-7.40886	1.14987e-08	8.35566e-08	9.66404
ENSG00000100225	PPP1R3B	1.2259	3.30256	7.40837	1.15152e-08	8.3632e-08	9.8635
ENSG00000085733	NA	0.970222	4.24404	7.40561	1.16086e-08	8.42658e-08	9.74722
ENSG00000132963	NA	2.50898	1.19822	7.40527	1.16204e-08	8.43063e-08	9.39546
ENSG00000109814	THRAP3	-0.498728	7.32251	-7.40454	1.16452e-08	8.44418e-08	9.25937
ENSG00000107537	ATP6AP2	0.385688	7.8879	7.40359	1.16775e-08	8.46312e-08	9.11808
ENSG00000116459	MIDN	-0.909978	5.32347	-7.39926	1.18268e-08	8.56675e-08	9.66122
ENSG00000140391	PAXIP1	-0.904814	4.83828	-7.3973	1.18948e-08	8.61146e-08	9.73812
ENSG00000172534	NDOR1	-1.39047	4.12308	-7.39652	1.1922e-08	8.622e-08	9.83119
ENSG00000111802	BRCA2	-1.25536	4.49643	-7.39658	1.192e-08	8.622e-08	9.81395
ENSG00000116221	NAV2	0.808612	4.98208	7.396	1.19403e-08	8.63067e-08	9.57296
ENSG00000124942	VPS26A	0.478406	7.0223	7.39528	1.19657e-08	8.6444e-08	9.24607
ENSG00000112695	PIP4P1	0.653408	5.57876	7.39416	1.20049e-08	8.66816e-08	9.48993
ENSG00000136238	QSER1	-0.597581	6.45506	-7.39124	1.21082e-08	8.73815e-08	9.39846
ENSG00000133318	IFT52	0.701879	5.68626	7.38346	1.23878e-08	8.93519e-08	9.432
ENSG00000105640	NUDT19	-0.775564	5.61516	-7.38069	1.24888e-08	9.00327e-08	9.54645
ENSG00000149932	NAPA	0.551926	5.85741	7.37872	1.2561e-08	9.05056e-08	9.3756
ENSG00000125691	MRPL48	0.709527	5.62822	7.37845	1.25711e-08	9.05305e-08	9.42516
ENSG00000113448	CABLES1	1.0465	4.13079	7.37807	1.25852e-08	9.05842e-08	9.71037
ENSG00000165868	DHX40	0.464011	6.838	7.37699	1.26251e-08	9.08238e-08	9.22691
ENSG00000127922	ZNF302	-0.676113	5.6891	-7.37645	1.26452e-08	9.08812e-08	9.49734
ENSG00000051523	PLXNA1	-0.940274	6.15628	-7.37641	1.26464e-08	9.08812e-08	9.44144
ENSG00000164032	NA	-1.46278	4.30491	-7.3734	1.27589e-08	9.16415e-08	9.76731
ENSG00000057019	MCM4	-0.372672	8.4163	-7.37062	1.28633e-08	9.23427e-08	8.95578
ENSG00000168894	ARRB2	0.568231	6.46955	7.36613	1.30338e-08	9.35173e-08	9.23658
ENSG00000142230	SDC4	0.552852	6.22572	7.36579	1.30471e-08	9.35639e-08	9.28908
ENSG00000158545	CRIP2	0.610635	5.99488	7.3635	1.31349e-08	9.41439e-08	9.29633
ENSG00000125676	ADA	0.633931	5.43926	7.36173	1.32035e-08	9.45861e-08	9.42326
ENSG00000072110	ATR	-0.627801	6.27526	-7.36093	1.32346e-08	9.47588e-08	9.3404
ENSG00000228232	NRCAM	-0.402251	8.12134	-7.35895	1.33117e-08	9.52608e-08	8.99251
ENSG00000133026	SNRPG	0.631369	6.65883	7.357	1.33879e-08	9.57558e-08	9.16505
ENSG00000100612	TPD52L2	-0.463833	7.49765	-7.35435	1.34925e-08	9.6454e-08	9.10869
ENSG00000108602	STK16	0.807639	4.94072	7.35315	1.35401e-08	9.66927e-08	9.48017
ENSG00000144824	RNF19A	0.463117	7.20511	7.35326	1.35358e-08	9.66927e-08	9.07448
ENSG00000168002	ANO10	0.678396	5.81891	7.34622	1.38189e-08	9.86318e-08	9.29911
ENSG00000069849	NA	0.630539	5.8478	7.34086	1.40379e-08	1.00143e-07	9.25335
ENSG00000124172	EEPD1	0.945676	4.2284	7.33045	1.4474e-08	1.032e-07	9.53331
ENSG00000100697	MICAL3	-0.98556	5.22972	-7.32868	1.45494e-08	1.03683e-07	9.48716
ENSG00000089063	TMEM160	0.868243	4.67356	7.32765	1.45937e-08	1.03945e-07	9.41256
ENSG00000133226	DOCK9	-0.805272	5.67712	-7.32148	1.48606e-08	1.05768e-07	9.36902
ENSG00000188846	PSMG2	0.529367	6.1355	7.32138	1.48652e-08	1.05768e-07	9.1678
ENSG00000111897	PDXK	-0.475713	8.22557	-7.31702	1.50567e-08	1.07075e-07	8.8406
ENSG00000189343	EXOSC2	-0.580042	6.48028	-7.31591	1.51061e-08	1.07371e-07	9.14246
ENSG00000123562	EIF1B	0.70358	5.47305	7.31458	1.51652e-08	1.07735e-07	9.28005
ENSG00000196531	NA	0.620997	6.63029	7.31298	1.52368e-08	1.08187e-07	9.04794
ENSG00000171456	C7orf50	0.530914	6.38721	7.31273	1.5248e-08	1.0821e-07	9.07812
ENSG00000196924	ZNF532	-0.728023	5.53351	-7.31101	1.53252e-08	1.08701e-07	9.34651
ENSG00000112941	APH1B	0.767024	4.96082	7.30957	1.53904e-08	1.09107e-07	9.37406
ENSG00000196205	PSMA5	0.433803	7.80582	7.30888	1.54217e-08	1.09272e-07	8.86215
ENSG00000167721	NA	1.36003	3.41768	7.30758	1.54806e-08	1.09633e-07	9.57775
ENSG00000129559	HSPB8	0.75296	5.29778	7.3027	1.57045e-08	1.11161e-07	9.36279
ENSG00000173821	MAF1	0.491554	7.06224	7.30067	1.57986e-08	1.11769e-07	8.92833
ENSG00000122378	NDUFA2	0.802978	5.61615	7.29991	1.58341e-08	1.11962e-07	9.19088
ENSG00000147677	STAG2	0.456988	7.16384	7.29853	1.58985e-08	1.12359e-07	8.92633
ENSG00000134882	IRGQ	-1.0446	4.45233	-7.29002	1.63015e-08	1.15148e-07	9.48783
ENSG00000137767	CEP290	-1.02256	5.38357	-7.2894	1.6331e-08	1.15297e-07	9.39433
ENSG00000130204	GBP2	1.78946	2.13276	7.28852	1.63737e-08	1.15538e-07	9.46156
ENSG00000179041	MAP3K9	-0.922121	4.86519	-7.28655	1.64688e-08	1.16149e-07	9.40528
ENSG00000234741	PLSCR1	0.560558	6.02334	7.28613	1.64892e-08	1.16227e-07	9.08407
ENSG00000143774	RRM1	0.361824	8.38933	7.28597	1.64968e-08	1.16227e-07	8.69671
ENSG00000143398	DIAPH1	-0.450057	7.39947	-7.28558	1.65158e-08	1.163e-07	8.89875
ENSG00000125826	ADAM19	-0.894746	4.90649	-7.28026	1.67766e-08	1.18076e-07	9.39283
ENSG00000131016	SNAPC4	-1.1735	4.28767	-7.27867	1.68553e-08	1.18569e-07	9.4796
ENSG00000033867	SEC11C	0.571244	5.85599	7.27807	1.68849e-08	1.18655e-07	9.10919
ENSG00000152291	HSPA8	-0.238593	11.9143	-7.27819	1.6879e-08	1.18655e-07	8.24322
ENSG00000091651	FSTL1	-0.541874	6.25703	-7.27764	1.69062e-08	1.18743e-07	9.08226
ENSG00000162244	NUDT1	0.652687	5.39041	7.27551	1.70125e-08	1.19428e-07	9.17193
ENSG00000116898	DTD1	0.66613	5.48901	7.27433	1.70718e-08	1.19783e-07	9.14747
ENSG00000118705	ALG1	0.629785	5.47277	7.27298	1.71399e-08	1.202e-07	9.15802
ENSG00000167996	ZNF783	-1.80571	3.61491	-7.27078	1.72511e-08	1.20917e-07	9.42881
ENSG00000118680	EBP	0.614831	5.53528	7.26962	1.73104e-08	1.2127e-07	9.11017
ENSG00000060339	CDH2	-0.564624	6.18628	-7.26917	1.73335e-08	1.2137e-07	9.06783
ENSG00000149547	KCTD1	-0.673267	5.5269	-7.26494	1.75508e-08	1.2282e-07	9.18423
ENSG00000065911	RECQL4	-0.760238	5.94297	-7.26478	1.75586e-08	1.2282e-07	9.11172
ENSG00000147408	PLEKHG3	-0.663862	5.61172	-7.26119	1.77457e-08	1.24066e-07	9.17833
ENSG00000171490	RFK	0.592841	5.97172	7.25975	1.7821e-08	1.24528e-07	9.02339
ENSG00000004059	CORO1B	0.565979	6.04781	7.25881	1.78704e-08	1.2481e-07	8.96445
ENSG00000124789	KDELR1	0.4089	8.11147	7.2583	1.7897e-08	1.24931e-07	8.63883
ENSG00000145494	NA	0.595042	6.49051	7.25159	1.82548e-08	1.27364e-07	8.90637
ENSG00000105379	NA	-1.23583	4.26161	-7.25112	1.82799e-08	1.27474e-07	9.41345
ENSG00000115760	ATAD5	-0.983039	5.0136	-7.25014	1.83326e-08	1.27776e-07	9.31218
ENSG00000197102	HGH1	-0.610251	6.01387	-7.2476	1.84703e-08	1.28604e-07	9.02339
ENSG00000226415	NUP188	-0.502938	7.14985	-7.24775	1.8462e-08	1.28604e-07	8.82263
ENSG00000182979	FAT1	-0.522549	8.19371	-7.24635	1.85385e-08	1.29014e-07	8.64666
ENSG00000126945	CHSY1	-0.761295	5.64185	-7.24579	1.8569e-08	1.2916e-07	9.17191
ENSG00000196683	PALLD	-0.444306	7.4104	-7.24352	1.86936e-08	1.2996e-07	8.7877
ENSG00000149357	COPB2	0.365216	8.08806	7.24069	1.88503e-08	1.30983e-07	8.60613
ENSG00000120690	FERMT1	-0.726144	5.44959	-7.24043	1.88647e-08	1.31017e-07	9.17634
ENSG00000071894	TAOK2	-0.687351	6.11369	-7.23861	1.89663e-08	1.31655e-07	8.99704
ENSG00000095564	SMAD3	-0.352355	8.45166	-7.23713	1.90491e-08	1.32163e-07	8.56081
ENSG00000185630	CDIPT	0.513656	6.46273	7.23453	1.91961e-08	1.33115e-07	8.85154
ENSG00000176915	TBC1D24	-1.42254	3.57972	-7.2312	1.93853e-08	1.34359e-07	9.35189
ENSG00000198612	NA	0.868921	4.63816	7.22716	1.96175e-08	1.35899e-07	9.1749
ENSG00000153922	UQCR11	0.614574	5.68868	7.22347	1.98322e-08	1.37274e-07	8.97799
ENSG00000159063	ARF1	0.30738	9.0973	7.2234	1.9836e-08	1.37274e-07	8.41729
ENSG00000183011	LMNB1	-0.431575	7.13671	-7.2223	1.99009e-08	1.37653e-07	8.69657
ENSG00000099341	ZBED5-AS1	1.04108	3.62616	7.2212	1.99656e-08	1.38031e-07	9.2845
ENSG00000105518	GOLGB1	-0.521408	7.13965	-7.2192	2.00835e-08	1.38775e-07	8.79265
ENSG00000136908	CD22	1.92526	1.94363	7.21684	2.02239e-08	1.39675e-07	9.1046
ENSG00000246705	PACSIN2	-0.541949	6.73786	-7.21565	2.02949e-08	1.40094e-07	8.8288
ENSG00000186834	SRI	0.584612	5.96268	7.21035	2.06145e-08	1.42229e-07	8.88291
ENSG00000120727	SURF6	-0.600638	5.8036	-7.20349	2.10361e-08	1.45064e-07	8.96703
ENSG00000197912	DUSP7	-1.09219	4.2308	-7.20297	2.10686e-08	1.45192e-07	9.25401
ENSG00000198356	SMPD4	-0.620461	6.16599	-7.20285	2.10759e-08	1.45192e-07	8.87165
ENSG00000134824	HECTD1	-0.409886	7.70894	-7.20154	2.11576e-08	1.45681e-07	8.59333
ENSG00000264364	NA	-1.46299	3.7942	-7.19973	2.12709e-08	1.46387e-07	9.26712
ENSG00000266472	CYC1	0.436468	8.04256	7.19748	2.14124e-08	1.47287e-07	8.46262
ENSG00000139168	ANTXR1	-0.433429	7.90666	-7.19699	2.14435e-08	1.47427e-07	8.52669
ENSG00000198189	PSMC2	0.408075	7.87933	7.19656	2.14711e-08	1.47542e-07	8.52836
ENSG00000088992	VAMP3	0.45112	7.03666	7.19597	2.15081e-08	1.47722e-07	8.63152
ENSG00000175793	DERA	0.589526	5.9855	7.1953	2.15509e-08	1.47942e-07	8.82986
ENSG00000049860	PPP1R9B	-0.671844	5.75163	-7.19379	2.16473e-08	1.48529e-07	8.92388
ENSG00000105254	TNFAIP8	0.693102	5.61716	7.1924	2.17361e-08	1.49063e-07	8.8997
ENSG00000163902	ZMYND11	-0.454156	7.29605	-7.18926	2.19384e-08	1.50375e-07	8.62758
ENSG00000064115	MORN2	0.871676	4.94615	7.18809	2.20147e-08	1.50822e-07	9.02157
ENSG00000157191	BID	0.541472	6.3203	7.18752	2.20514e-08	1.50998e-07	8.76732
ENSG00000088888	PHF2	-0.865116	5.12055	-7.18493	2.22208e-08	1.52081e-07	9.07823
ENSG00000169180	CLDN3	1.40658	2.52694	7.18196	2.24169e-08	1.5327e-07	9.21679
ENSG00000218175	ZNF185	-0.701779	6.18802	-7.18208	2.24088e-08	1.5327e-07	8.82947
ENSG00000108826	METTL9	0.469112	7.09729	7.17882	2.26256e-08	1.5462e-07	8.56806
ENSG00000047410	NA	-1.54541	3.70458	-7.17805	2.26767e-08	1.54892e-07	9.20817
[truncated: 11,655 more rows]

## Sheet: Genes_used_for_heatmap
Geneid	OXIDATIVE		Geneid	Interferon		Geneid	Centrosome		Geneid	Spliceosome
ENSG00000057704	NDUFA1		ENSG00000068697	IRF2		ENSG00000101255	MKI67		ENSG00000138658	SRSF11
ENSG00000073737	ATP6V0B		ENSG00000077235	UBE2L6		ENSG00000108840	CENPE		ENSG00000023445	PNN
ENSG00000084072	ALDH6A1		ENSG00000108406	TNFSF10		ENSG00000110092	CCND1		ENSG00000171345	RBM25
ENSG00000099814	ATP6V1F		ENSG00000112096	SOD2		ENSG00000111802	BRCA2		ENSG00000188549	PRPF38B
ENSG00000112159	COX8A		ENSG00000117419	PELI1		ENSG00000125652	TNPO2		ENSG00000169991	ACIN1
ENSG00000112739	ATP5ME		ENSG00000129824	IFITM3		ENSG00000129235	PDS5B		ENSG00000019144	SRSF1
ENSG00000120306	NDUFB3		ENSG00000130204	GBP2		ENSG00000132522	CCP110		ENSG00000163950	CHERP
ENSG00000122378	NDUFA2		ENSG00000130723	TNFAIP3		ENSG00000132692	CDC25A		ENSG00000172375	THOC2
ENSG00000126106	ATP6V1E1		ENSG00000132382	PTGS2		ENSG00000136450	CASP8AP2		ENSG00000223959	SRSF6
ENSG00000131711	NDUFC1		ENSG00000136813	ISG20		ENSG00000138166	SMC1A		ENSG00000164403	TCERG1
ENSG00000138778	COX6B1		ENSG00000137207	IFIH1		ENSG00000145979	SRSF2		ENSG00000145979	SRSF2
ENSG00000145685	ATP6V0E1		ENSG00000138434	IFIT2		ENSG00000160781	MYC		ENSG00000176697	DDX5
ENSG00000151743	PHYH		ENSG00000138495	SAMD9		ENSG00000164134	E2F3		ENSG00000251129	SRSF7
ENSG00000161642	COX6A1		ENSG00000140326	RIPK2		ENSG00000172794	POLE		ENSG00000247271	DDX42
ENSG00000165757	COX5B		ENSG00000140678	DDX58		ENSG00000175224	CEP152		ENSG00000114391	SRSF4
ENSG00000168310	NDUFB8		ENSG00000173110	IFITM2		ENSG00000187800	EZH2		ENSG00000170271	SRSF10
ENSG00000177469	NDUFB1		ENSG00000180425	IFI35		ENSG00000196793	E2F1		ENSG00000257270	SRSF5
ENSG00000177854	COX6C		ENSG00000185344	ICAM1		ENSG00000197905	SMC4		ENSG00000089154	U2SURP
ENSG00000185219	ATP5PD		ENSG00000188807	B2M		ENSG00000244649	CEP250
ENSG00000196498	IDH1		ENSG00000213493	VCAM1		ENSG00000255893	PIF1
ENSG00000249915	COX7B		ENSG00000219023	TENT5A		ENSG00000266967	PCNT
ENSG00000255248	NDUFA8		ENSG00000244560	IFIT3			CDC27
ENSG00000262902	NDUFS6		ENSG00000158864	VAMP8			CDC20
ENSG00000270069	COX7A2			IFIT1			CUL1
ENSG00000274925	ATP5MG			ISG15			HNRNPU
ENSG00000275464	NDUFB7			IFNAR1			CENPF
ENSG00000279759	NDUFB4			IL6R			CCNT1
ENSG00000283511	ATP5PO			IL32			CTCF
				IL34			CCNF
				TNFSF9			CEP85
ENSG00000222009	DECR1			CASP4			CEP164
				CASP9			CEP170B
							CEP290
							CEP350
							CEP83
							CEP78
							CEP295
							CEP95
							CEP131
							CEP135
							INCENP
							CENPT
							CENPJ
							CENPO
							CCNL2
							CCN1
							CCND3
							CCN2
							CCNE1
							CCNL1
							CCNT2
							CCNE2
							CDCA7
							CCDC14
							CCDC9B
							CCDC137
							CDC42EP3
							CCDC86
							CDC6
							CCDC88A
