# Supplementary material for: Integration of the Connectivity Map and Pathway Analysis to Predict Plant Extract’s Medicinal Properties—The Study Case of Sarcopoterium spinosum L
Source: Plants (Basel). 2022 Aug 24;11(17):2195. doi: 10.3390/plants11172195 (PMC9460920; doi:10.3390/plants11172195)
Supplement: Supplementary file 1 [file plants-11-02195-s001.zip › Supplementary-Table S2.xlsx]

## Sheet: Sheet1
NAME_DOWNREGULATED	NOM p-value	FDR q-value	ES (Enrichment Score)	NES (Normalized Enrichment Score)				NAME_UPREGULATED	NOM p-value	FDR q-value	ES (Enrichment Score)	NES (Normalized Enrichment Score)
HALLMARK_MYC_TARGETS_V2	0.0208696	0.115267	-0.456617	-1.53913				HALLMARK_CHOLESTEROL_HOMEOSTASIS	0	0	0.606709	2.24052
HALLMARK_WNT_BETA_CATENIN_SIGNALING	0.0273973	0.133311	-0.536986	-1.5957				HALLMARK_OXIDATIVE_PHOSPHORYLATION	0	0	0.519968	2.23059
HALLMARK_HEDGEHOG_SIGNALING	0.0933333	0.16369	-0.506065	-1.4134				HALLMARK_INTERFERON_GAMMA_RESPONSE	0	0	0.536782	2.08416
HALLMARK_KRAS_SIGNALING_DN	0.0649351	0.195994	-0.428225	-1.42867				HALLMARK_FATTY_ACID_METABOLISM	0.00213675	0.00152111	0.504184	1.96244
HALLMARK_G2M_CHECKPOINT	0.0428816	0.22006	-0.329239	-1.34137				HALLMARK_TNFA_SIGNALING_VIA_NFKB	0	0.00173265	0.463068	1.92881
HALLMARK_TGF_BETA_SIGNALING	0.133212	0.245576	-0.412489	-1.29783				HALLMARK_INTERFERON_ALPHA_RESPONSE	0	0.00183632	0.554632	1.95262
HALLMARK_MITOTIC_SPINDLE	0.0802139	0.287488	-0.298648	-1.24597				HALLMARK_APOPTOSIS	0	0.00414084	0.46505	1.87153
HALLMARK_UV_RESPONSE_DN	0.191379	0.367838	-0.309347	-1.18149				HALLMARK_INFLAMMATORY_RESPONSE	0.00436681	0.0119682	0.458771	1.74687
HALLMARK_NOTCH_SIGNALING	0.46516	0.691472	-0.353094	-0.972211				HALLMARK_HYPOXIA	0	0.0230207	0.410212	1.66654
HALLMARK_E2F_TARGETS	0.584699	0.713409	-0.22781	-0.93972				HALLMARK_IL6_JAK_STAT3_SIGNALING	0.022869	0.0281797	0.523451	1.62059
HALLMARK_COAGULATION	0.482558	0.75787	-0.272795	-0.973238				HALLMARK_BILE_ACID_METABOLISM	0.013363	0.0282684	0.45601	1.63357
HALLMARK_ANGIOGENESIS	0.48785	0.831388	-0.355181	-0.976694				HALLMARK_ALLOGRAFT_REJECTION	0.00700935	0.0375193	0.422237	1.56141
HALLMARK_MYC_TARGETS_V1	0.882867	0.883363	-0.191355	-0.803847				HALLMARK_GLYCOLYSIS	0.00235849	0.0399619	0.378422	1.56299
HALLMARK_EPITHELIAL_MESENCHYMAL_TRANSITION	0.818015	0.904389	-0.213671	-0.829205				HALLMARK_XENOBIOTIC_METABOLISM	0.0110865	0.05379	0.369832	1.50824
HALLMARK_REACTIVE_OXYGEN_SPECIES_PATHWAY	0.839161	0.920257	-0.226999	-0.721096				HALLMARK_KRAS_SIGNALING_UP	0.0246085	0.0632579	0.388122	1.48095
								HALLMARK_MTORC1_SIGNALING	0.0122549	0.0685798	0.348642	1.45922
								HALLMARK_PI3K_AKT_MTOR_SIGNALING	0.0554273	0.107751	0.377098	1.38668
								HALLMARK_SPERMATOGENESIS	0.0762887	0.109533	0.414062	1.36676
								HALLMARK_P53_PATHWAY	0.0251142	0.114206	0.331135	1.36872
								HALLMARK_IL2_STAT5_SIGNALING	0.0710901	0.122824	0.335718	1.34374
								HALLMARK_ADIPOGENESIS	0.044289	0.127078	0.322464	1.32998
								HALLMARK_PEROXISOME	0.111597	0.161515	0.347899	1.28654
								HALLMARK_HEME_METABOLISM	0.112613	0.161521	0.316961	1.27936
								HALLMARK_ESTROGEN_RESPONSE_LATE	0.0844444	0.163996	0.315035	1.2645
								HALLMARK_COMPLEMENT	0.101996	0.168345	0.317151	1.26661
								HALLMARK_APICAL_JUNCTION	0.127803	0.198536	0.306589	1.22575
								HALLMARK_UV_RESPONSE_UP	0.237327	0.319752	0.287287	1.12812
								HALLMARK_ESTROGEN_RESPONSE_EARLY	0.257384	0.327954	0.271889	1.11596
								HALLMARK_MYOGENESIS	0.399543	0.460083	0.268551	1.03479
								HALLMARK_PROTEIN_SECRETION	0.458613	0.491118	0.27044	1.01169
								HALLMARK_ANDROGEN_RESPONSE	0.515021	0.574601	0.262132	0.96342
								HALLMARK_UNFOLDED_PROTEIN_RESPONSE	0.988235	0.974597	0.160121	0.622882
								HALLMARK_DNA_REPAIR	0.99115	0.984904	0.163417	0.668699
								HALLMARK_APICAL_SURFACE	0.814433	0.992353	0.269364	0.704116
