# Supplementary material for: Integration of the Connectivity Map and Pathway Analysis to Predict Plant Extract’s Medicinal Properties—The Study Case of Sarcopoterium spinosum L
Source: Plants (Basel). 2022 Aug 24;11(17):2195. doi: 10.3390/plants11172195 (PMC9460920; doi:10.3390/plants11172195)
Supplement: Supplementary file 1 [file plants-11-02195-s001.zip › Supplementary-Table S3.xlsx]

## Sheet: Sheet1
NAME_DOWNREGULATED	NOM p-value	FDR q-value	ES (Enrichment Score)	NES (Normalized Enrichment Score)				NAME_UPREGULATED	NOM p-value	FDR q-value	ES (Enrichment Score)	NES (Normalized Enrichment Score)
HALLMARK_MITOTIC_SPINDLE	0	0.105172	-0.52096	-1.47872				HALLMARK_INTERFERON_GAMMA_RESPONSE	0	0	0.780688	2.86484
HALLMARK_WNT_BETA_CATENIN_SIGNALING	0.120988	0.526918	-0.563242	-1.30064				HALLMARK_TNFA_SIGNALING_VIA_NFKB	0	0	0.763944	2.78909
HALLMARK_MYOGENESIS	0.429487	1	-0.378121	-1.03819				HALLMARK_INTERFERON_ALPHA_RESPONSE	0	0	0.800697	2.65705
HALLMARK_APICAL_JUNCTION	0.447508	1	-0.371376	-1.02458				HALLMARK_INFLAMMATORY_RESPONSE	0	0	0.760013	2.59184
HALLMARK_E2F_TARGETS	0.494253	1	-0.354514	-1.00781				HALLMARK_IL6_JAK_STAT3_SIGNALING	0	0	0.797371	2.54202
HALLMARK_REACTIVE_OXYGEN_SPECIES_PATHWAY	0.542823	1	-0.386205	-0.95886				HALLMARK_COMPLEMENT	0	0	0.623597	2.23385
HALLMARK_BILE_ACID_METABOLISM	0.63914	1	-0.354915	-0.924951				HALLMARK_KRAS_SIGNALING_UP	0	0	0.604405	2.16945
HALLMARK_G2M_CHECKPOINT	0.68361	1	-0.31918	-0.92101				HALLMARK_ALLOGRAFT_REJECTION	0	0	0.591973	2.0691
HALLMARK_ANGIOGENESIS	0.615006	1	-0.393765	-0.910172				HALLMARK_APOPTOSIS	0	0.00797807	0.525788	1.83386
HALLMARK_NOTCH_SIGNALING	0.685789	1	-0.381963	-0.858872				HALLMARK_IL2_STAT5_SIGNALING	0	0.0217808	0.448758	1.62003
HALLMARK_SPERMATOGENESIS	0.820542	1	-0.310113	-0.800787				HALLMARK_EPITHELIAL_MESENCHYMAL_TRANSITION	0	0.0218721	0.44377	1.60732
HALLMARK_HEME_METABOLISM	0.934759	1	-0.266594	-0.746561				HALLMARK_MTORC1_SIGNALING	0	0.0231933	0.42875	1.63604
HALLMARK_HEDGEHOG_SIGNALING	0.833542	1	-0.339755	-0.74465				HALLMARK_OXIDATIVE_PHOSPHORYLATION	0	0.024472	0.43558	1.64379
HALLMARK_UV_RESPONSE_DN	0.932059	1	-0.26477	-0.733282				HALLMARK_CHOLESTEROL_HOMEOSTASIS	0.00854701	0.0353059	0.467409	1.53523
HALLMARK_DNA_REPAIR	0.993637	1	-0.222779	-0.620268				HALLMARK_HYPOXIA	0	0.0396558	0.407754	1.49745
HALLMARK_PI3K_AKT_MTOR_SIGNALING	1	1	-0.18306	-0.489102				HALLMARK_COAGULATION	0.00990099	0.0397938	0.448292	1.50628
HALLMARK_PROTEIN_SECRETION	1	1	-0.15667	-0.420502				HALLMARK_MYC_TARGETS_V1	0	0.0665875	0.383246	1.41561
HALLMARK_ADIPOGENESIS	1	1	-0.112724	-0.321632				HALLMARK_KRAS_SIGNALING_DN	0.0735294	0.122839	0.398745	1.29842
								HALLMARK_ESTROGEN_RESPONSE_LATE	0.0142857	0.214213	0.325267	1.20966
								HALLMARK_P53_PATHWAY	0.0322581	0.296179	0.30604	1.13972
								HALLMARK_ESTROGEN_RESPONSE_EARLY	0.190476	0.296854	0.312809	1.14641
								HALLMARK_XENOBIOTIC_METABOLISM	0.1875	0.298497	0.307267	1.13176
								HALLMARK_APICAL_SURFACE	0.319249	0.323984	0.413741	1.10932
								HALLMARK_GLYCOLYSIS	0.309524	0.443741	0.279754	1.05546
								HALLMARK_UV_RESPONSE_UP	0.355932	0.502919	0.279507	1.02655
								HALLMARK_TGF_BETA_SIGNALING	0.516129	0.581365	0.319694	0.990576
								HALLMARK_UNFOLDED_PROTEIN_RESPONSE	0.68	0.718059	0.262028	0.933063
								HALLMARK_ANDROGEN_RESPONSE	0.892157	0.97306	0.235138	0.80151
								HALLMARK_MYC_TARGETS_V2	1	0.992126	0.191709	0.652805
								HALLMARK_FATTY_ACID_METABOLISM	1	1	0.195851	0.703054
								HALLMARK_PEROXISOME	1	1	0.183826	0.58101
