# Supplementary material for: Integration of the Connectivity Map and Pathway Analysis to Predict Plant Extract’s Medicinal Properties—The Study Case of Sarcopoterium spinosum L
Source: Plants (Basel). 2022 Aug 24;11(17):2195. doi: 10.3390/plants11172195 (PMC9460920; doi:10.3390/plants11172195)
Supplement: Supplementary file 1 [file plants-11-02195-s001.zip › Supplementary-Table S4.xlsx]

## Sheet: DRUGS
Supplementary Table S4: The list shows the drugs that has been checked for the GSEA-CMAP integration analysis. The list of pathways obtained after running GSEA of these drugs transcriptomic data has been provided in the second sheet of this excel file.
Drug	Description	Pathway
BX-795	IKK inhibitor	NFKb pathway
IKK-16	IKK inhibitor	NFKb pathway
CHEMBL-374350	NFKb pathway	NFKb pathway inhibitor
Cediranib	KIT inhibitor	RTK pathway
Neratinib	EGFR inhibitor	RTK pathway			have
TG-101348	FLT3 inhibitor	RTK pathway
RS-17053	Adrenergic receptor antagonist	GPCR pathway
Sertraline	Serotonin receptor antagonist	GPCR pathway
5-nonyloxytryptamine	Serotonin receptor antagonist	GPCR pathway

## Sheet: CMAP_drugs_pathways
Supplementary Table S4: Represents the list of enriched pathways of drugs (GPCRs, RTKs, NFKBs) that showed similar signatures with RNA-seq analysis.
Pathways_found in GPCRs	Presence / out of 3 drugs		Pathways_NFKB	Presense / 3		Pathways_RTKs	Presense /4
Cell cycle	3		DNA replication	3		Ribosome biogenesis in eukaryotes	4
DNA replication	3		Fanconi anemia pathway	3		Cell cycle	3
Nucleotide excision repair	3		Homologous recombination	3		DNA replication	3
Parkinson disease	3		Mismatch repair	3		Proteasome	3
Proteasome	3		AGE-RAGE signaling pathway in diabetic complications	2		Pyrimidine metabolism	3
Pyrimidine metabolism	3		Apoptosis	2		RNA transport	3
Ribosome biogenesis in eukaryotes	3		Bladder cancer	2		Spliceosome	3
RNA polymerase	3		Cell cycle	2		Terpenoid backbone biosynthesis	3
RNA transport	3		Chronic myeloid leukemia	2		Autophagy	2
Shigellosis	3		Hematopoietic cell lineage	2		Fanconi anemia pathway	2
Spliceosome	3		IL-17 signaling pathway	2		Fatty acid metabolism	2
Base excision repair	2		Mitophagy	2		Lysosome	2
Fat digestion and absorption	2		Nucleotide excision repair	2		Mismatch repair	2
Huntington disease	2		Prion diseases	2		Mitophagy	2
IL-17 signaling pathway	2		Rheumatoid arthritis	2		Oxidative phosphorylation	2
Legionellosis	2		Ribosome	2		Purine metabolism	2
Lysosome	2		Spliceosome	2		Steroid biosynthesis	2
Mismatch repair	2		TNF signaling pathway	2		Synaptic vesicle cycle	2
mRNA surveillance pathway	2		Toxoplasmosis	2		TNF signaling pathway	2
Pathogenic Escherichia coli infection	2		African trypanosomiasis	1		Aminoacyl-tRNA biosynthesis	1
PPAR signaling pathway	2		Alanine, aspartate and glutamate metabolism	1		Antifolate resistance	1
Protein export	2		Allograft rejection	1		Arrhythmogenic right ventricular cardiomyopathy (ARVC)	1
Ribosome	2		Aminoacyl-tRNA biosynthesis	1		Base excision repair	1
Steroid biosynthesis	2		Amoebiasis	1		beta-Alanine metabolism	1
Terpenoid backbone biosynthesis	2		Antigen processing and presentation	1		Biosynthesis of unsaturated fatty acids	1
Alzheimer disease	1		Apelin signaling pathway	1		Chronic myeloid leukemia	1
Amino sugar and nucleotide sugar metabolism	1		Arachidonic acid metabolism	1		Citrate cycle (TCA cycle)	1
Apoptosis	1		Autoimmune thyroid disease	1		Collecting duct acid secretion	1
Asthma	1		Autophagy	1		Cytokine-cytokine receptor interaction	1
beta-Alanine metabolism	1		B cell receptor signaling pathway	1		Cytosolic DNA-sensing pathway	1
Biosynthesis of amino acids	1		Base excision repair	1		ECM-receptor interaction	1
Bladder cancer	1		Cell adhesion molecules (CAMs)	1		Endometrial cancer	1
Butanoate metabolism	1		Cellular senescence	1		Fatty acid elongation	1
Calcium signaling pathway	1		Chagas disease (American trypanosomiasis)	1		Glycosaminoglycan biosynthesis	1
Cellular senescence	1		Chemokine signaling pathway	1		Homologous recombination	1
Cholesterol metabolism	1		Cocaine addiction	1		Huntington disease	1
Chronic myeloid leukemia	1		Colorectal cancer	1		Hypertrophic cardiomyopathy (HCM)	1
Complement and coagulation cascades	1		Complement and coagulation cascades	1		IL-17 signaling pathway	1
Cysteine and methionine metabolism	1		C-type lectin receptor signaling pathway	1		JAK-STAT signaling pathway	1
Fanconi anemia pathway	1		Cytokine-cytokine receptor interaction	1		Lysine degradation	1
Fatty acid biosynthesis	1		Cytosolic DNA-sensing pathway	1		Neuroactive ligand-receptor interaction	1
Fatty acid metabolism	1		Epithelial cell signaling in Helicobacter pylori infection	1		Nicotinate and nicotinamide metabolism	1
Ferroptosis	1		Epstein-Barr virus infection	1		Nicotine addiction	1
Fluid shear stress and atherosclerosis	1		Ether lipid metabolism	1		Nucleotide excision repair	1
Glycerophospholipid metabolism	1		Fluid shear stress and atherosclerosis	1		Olfactory transduction	1
Glycosaminoglycan degradation	1		Graft-versus-host disease	1		One carbon pool by folate	1
Glyoxylate and dicarboxylate metabolism	1		Hepatitis B	1		Other glycan degradation	1
Hematopoietic cell lineage	1		Hepatitis C	1		p53 signaling pathway	1
Herpes simplex infection	1		Herpes simplex infection	1		Parkinson disease	1
Hippo signaling pathway	1		Human cytomegalovirus infection	1		Pathogenic Escherichia coli infection	1
Homologous recombination	1		Human immunodeficiency virus 1 infection	1		Phagosome	1
Influenza A	1		Human T-cell leukemia virus 1 infection	1		Phototransduction	1
Mannose type O-glycan biosynthesis	1		Inflammatory bowel disease (IBD)	1		Propanoate metabolism	1
Maturity onset diabetes of the young	1		Influenza A	1		Protein export	1
Mineral absorption	1		Kaposi sarcoma-associated herpesvirus infection	1		Protein processing in endoplasmic reticulum	1
Mitophagy	1		Legionellosis	1		Ribosome	1
Neuroactive ligand-receptor interaction	1		Leishmaniasis	1		RNA polymerase	1
Nicotine addiction	1		Longevity regulating pathway	1		Shigellosis	1
Non-alcoholic fatty liver disease (NAFLD)	1		Malaria	1		Small cell lung cancer	1
Non-small cell lung cancer	1		Mannose type O-glycan biosynthesis	1		Taste transduction	1
Olfactory transduction	1		Measles	1		Valine, leucine and isoleucine degradation	1
Oocyte meiosis	1		mRNA surveillance pathway	1		Vibrio cholerae infection	1
Ovarian steroidogenesis	1		Natural killer cell mediated cytotoxicity	1
Oxidative phosphorylation	1		Neuroactive ligand-receptor interaction	1
p53 signaling pathway	1		Neurotrophin signaling pathway	1
Pancreatic cancer	1		NF-kappa B signaling pathway	1
Phototransduction	1		NOD-like receptor signaling pathway	1
Protein processing in endoplasmic reticulum	1		Non-homologous end-joining	1
Purine metabolism	1		One carbon pool by folate	1
Pyruvate metabolism	1		Oocyte meiosis	1
RNA degradation	1		Osteoclast differentiation	1
Salmonella infection	1		p53 signaling pathway	1
Steroid hormone biosynthesis	1		Pancreatic cancer	1
Taste transduction	1		Pathogenic Escherichia coli infection	1
Thermogenesis	1		Pertussis	1
Thyroid cancer	1		Phagosome	1
TNF signaling pathway	1		Phospholipase D signaling pathway	1
Ubiquitin mediated proteolysis	1		Prolactin signaling pathway	1
Valine, leucine and isoleucine degradation	1		Propanoate metabolism	1
Vibrio cholerae infection	1		Prostate cancer	1
Viral carcinogenesis	1		Proteoglycans in cancer	1
			Pyrimidine metabolism	1
			Pyruvate metabolism	1
			Ras signaling pathway	1
			Regulation of actin cytoskeleton	1
			Relaxin signaling pathway	1
			RIG-I-like receptor signaling pathway	1
			RNA transport	1
			Salmonella infection	1
			Shigellosis	1
			Small cell lung cancer	1
			Staphylococcus aureus infection	1
			Steroid biosynthesis	1
			T cell receptor signaling pathway	1
			Terpenoid backbone biosynthesis	1
			Th1 and Th2 cell differentiation	1
			Th17 cell differentiation	1
			Thyroid cancer	1
			Toll-like receptor signaling pathway	1
			Tuberculosis	1
			Type I diabetes mellitus	1
			Ubiquitin mediated proteolysis	1
			Viral myocarditis	1
