# Supplementary figures and images for: Integration of the Connectivity Map and Pathway Analysis to Predict Plant Extract’s Medicinal Properties—The Study Case of Sarcopoterium spinosum L.
Source: MDPI journal article supplement (doi:10.3390/plants11172195), 2022-08-24

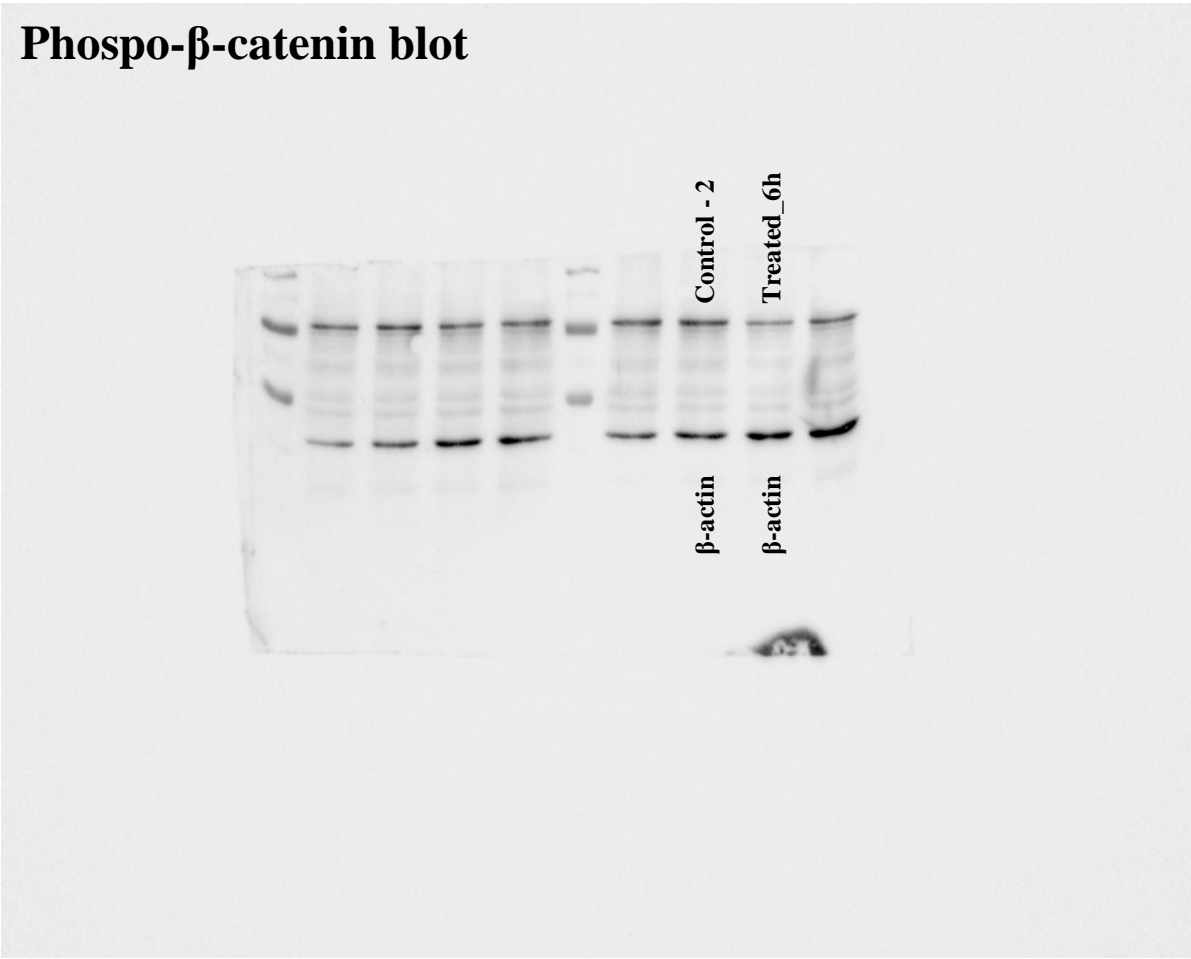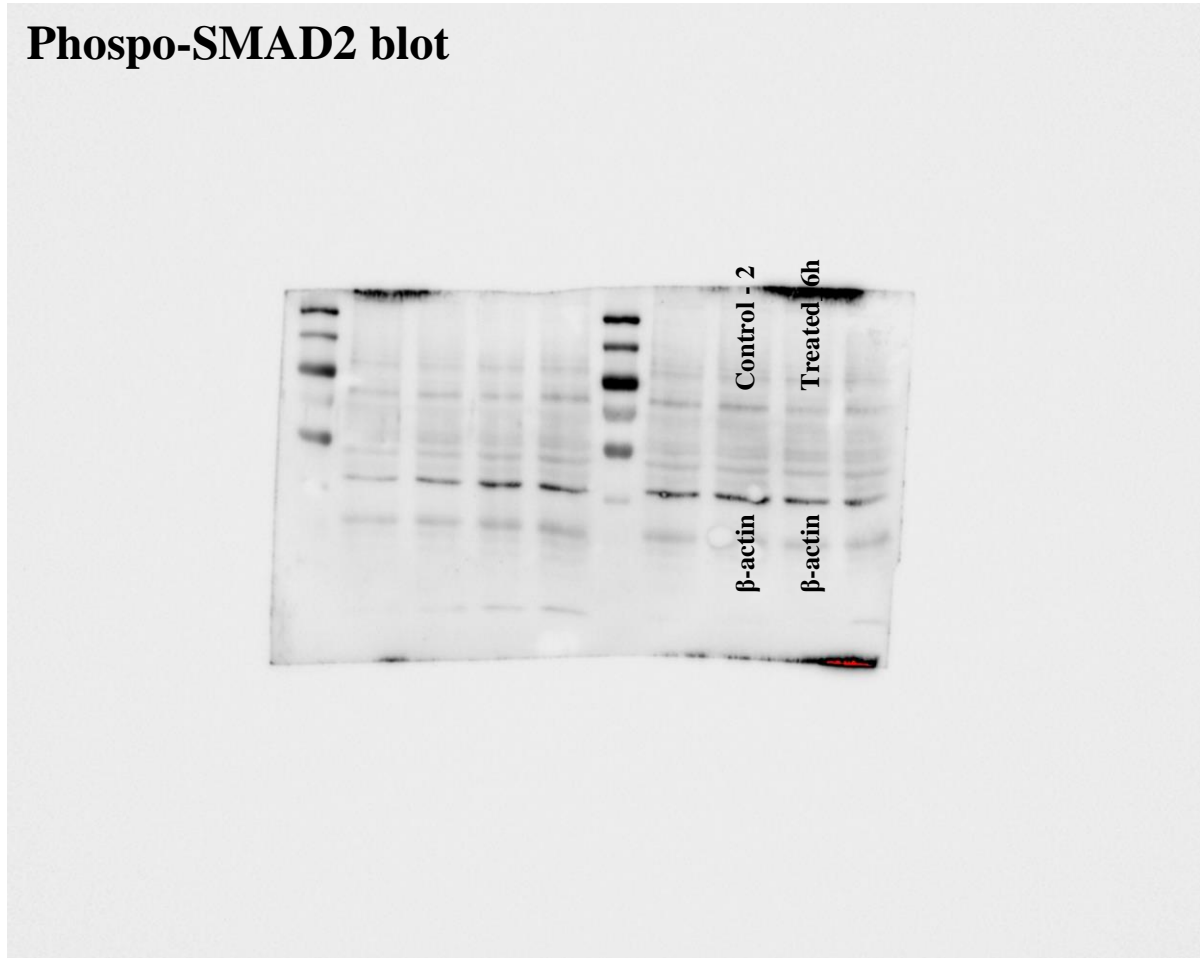

LC3\_1 and LC3\_2 blot

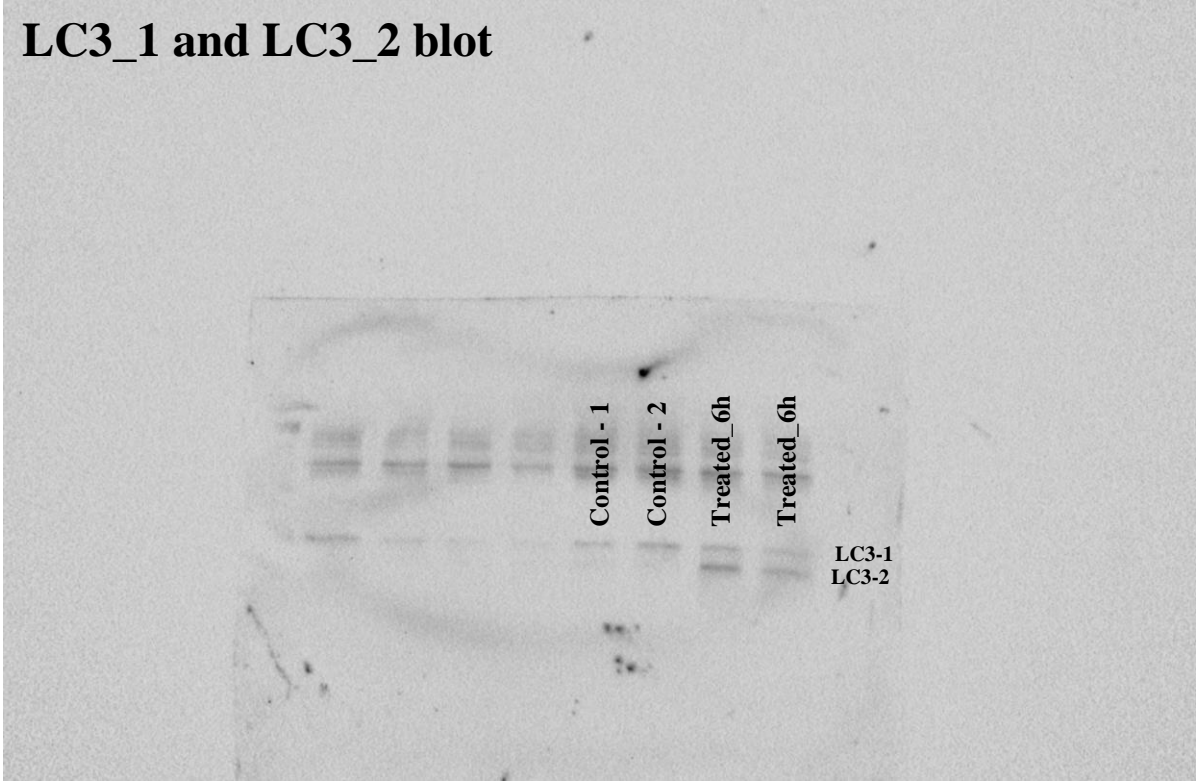

LC3\_1 and LC3\_2  $\beta$ -actin blot

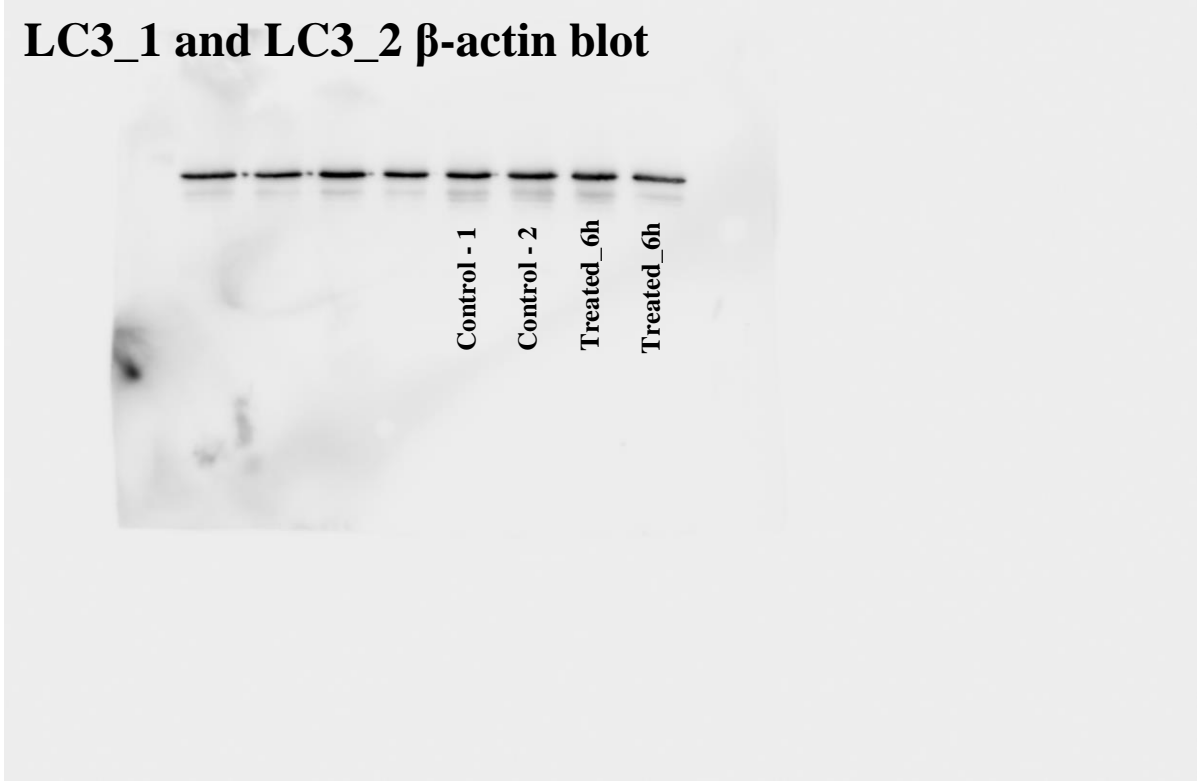

Supplement: s1 [file s1]
